# Supplementary material
Source: PubMed Central journal article supplement (PMC6642696)
Supplement: EMS83251-supplement-Supplementary_dataset_1.pdf [file EMS83251-supplement-Supplementary_dataset_1.pdf]

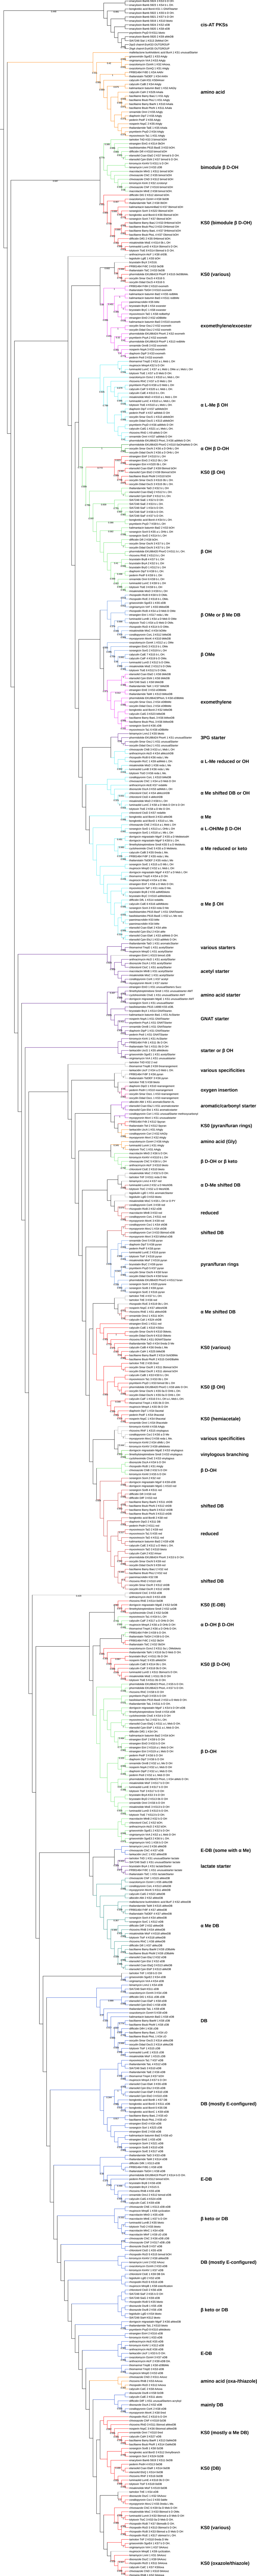

**cis-AT PKSS**  
**amino acid**  
**bimodule  $\beta$  D-OH**  
**KSO (bimodule  $\beta$  D-OH)**  
**KSO (various)**  
**exomethylene/exoester**  
 **$\alpha$  L-Me  $\beta$  OH**  
 **$\alpha$  OH  $\beta$  D-OH**  
**KSO ( $\beta$  OH)**  
 **$\beta$  OH**  
 **$\beta$  OMe or  $\beta$  Me DB**  
 **$\beta$  OMe**  
**exomethylene**  
**3PG starter**  
 **$\alpha$  L-Me reduced or OH**  
 **$\alpha$  Me shifted DB or OH**  
 **$\alpha$  Me**  
 **$\alpha$  L-OH/Me  $\beta$  D-OH**  
 **$\alpha$  Me reduced or keto**  
**various starters**  
**acetyl starter**  
**amino acid starter**  
**GNAT starter**  
**starter or  $\beta$  OH**  
**various specificities**  
**oxygen insertion**  
**aromatic/carbonyl starter**  
**KSO (pyran/furan rings)**  
**amino acid (Gly)**  
 **$\beta$  D-OH or  $\beta$  keto**  
 **$\alpha$  D-Me shifted DB**  
 **$\alpha$  Me shifted DB**  
**KSO (various)**  
**KSO ( $\beta$  OH)**  
**KSO (hemiacetale)**  
**various specificities**  
**vinyllogous branching**  
 **$\beta$  D-OH**  
 **$\alpha$  D-OH  $\beta$  D-OH**  
**reduced**  
**shifted DB**  
**KSO (E-DB)**  
 **$\alpha$  D-OH  $\beta$  D-OH**  
**KSO ( $\beta$  D-OH)**  
 **$\beta$  D-OH**  
**E-DB (some with  $\alpha$  Me)**  
**lactate starter**  
 **$\alpha$  Me DB**  
 **$\beta$  keto or DB**  
**E-DB**  
**amino acid (oxa/thiazole)**  
**mainly DB**  
**KSO (mostly  $\alpha$  Me DB)**  
**KSO (DB)**  
**KSO (various)**  
**KSO (oxazole/thiazole)**
