# Supplementary material
Source: PubMed Central journal article supplement (PMC6642696)
Supplement: EMS83251-supplement-Supplementary_figures_and_tables.pdf [file EMS83251-supplement-Supplementary_figures_and_tables.pdf]

## Supplementary Information

# Automated structure prediction of *trans*-acyltransferase polyketide synthase products

Eric J. N. Helfrich,<sup>1\*</sup> Reiko Ueoka,<sup>1\*</sup> Alon Dolev,<sup>1\*</sup> Michael Rust,<sup>1</sup> Roy A. Meoded,<sup>1</sup> Agneya Bhushan,<sup>1</sup> Gianmaria Califano,<sup>2,3</sup> Rodrigo Costa,<sup>2,4</sup> Muriel Gugger,<sup>5</sup> Christoph Steinbeck,<sup>3,6</sup> Pablo Moreno,<sup>6#</sup> and Jörn Piel<sup>1#</sup>

<sup>1</sup>Institute of Microbiology, Eidgenössische Technische Hochschule (ETH) Zürich, Vladimir-Prelog Weg 4, 8093 Zurich, Switzerland.

<sup>2</sup>Centre of Marine Sciences, University of Algarve, Gambelas Campus, Building 7, 8005-139 Faro, Portugal.

<sup>3</sup>Institute for Inorganic and Analytical Chemistry, Friedrich-Schiller-Universität Jena, Lessingstrasse 8, 07743 Jena, Germany.

<sup>4</sup>Institute for Bioengineering and Biosciences (IBB), Instituto Superior Técnico, Universidade de Lisboa, 1049-001 Lisbon, Portugal.

<sup>5</sup>Institut Pasteur, Collection des Cyanobactéries, 28 Rue du Docteur Roux, 75724 Paris CEDEX15, France.

<sup>6</sup>European Bioinformatics Institute (EBI), Wellcome Trust Genome Campus, Hinxton, Cambridge, CB10 1SD, United Kingdom.

#Correspondence should be addressed to JP ([jpiel@ethz.ch](mailto:jpiel@ethz.ch)) and PM ([pmoreno@ebi.ac.uk](mailto:pmoreno@ebi.ac.uk)).

\*Authors contributed equally to this work

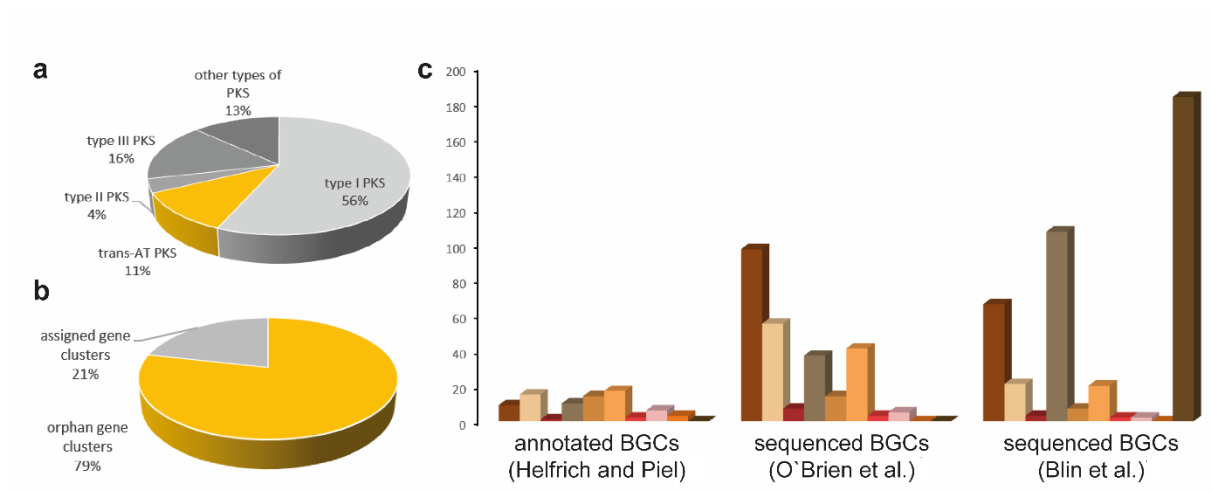

**Supplementary Figure 1: Distribution of *trans*-AT PKS BGCs** (a) Relative abundance of polyketide BGCs according to the antiSMASH database.<sup>1</sup> (b) Comparison between characterized and orphan *trans*-AT PKS BGCs. (c) Comparison of BGCs with characterized polyketides<sup>2,3</sup> and published data<sup>1,4</sup> on the occurrence of *trans*-AT PKS BGCs in published genomes.

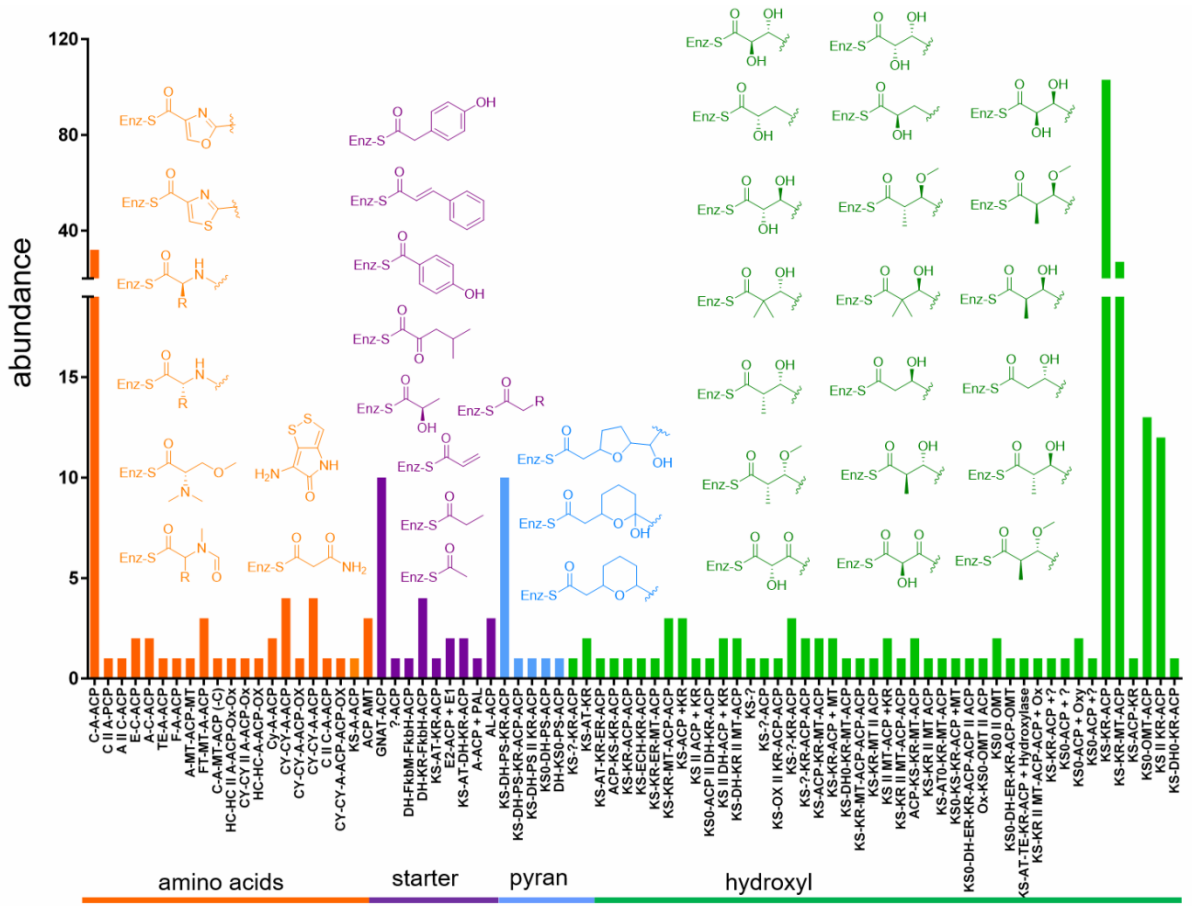

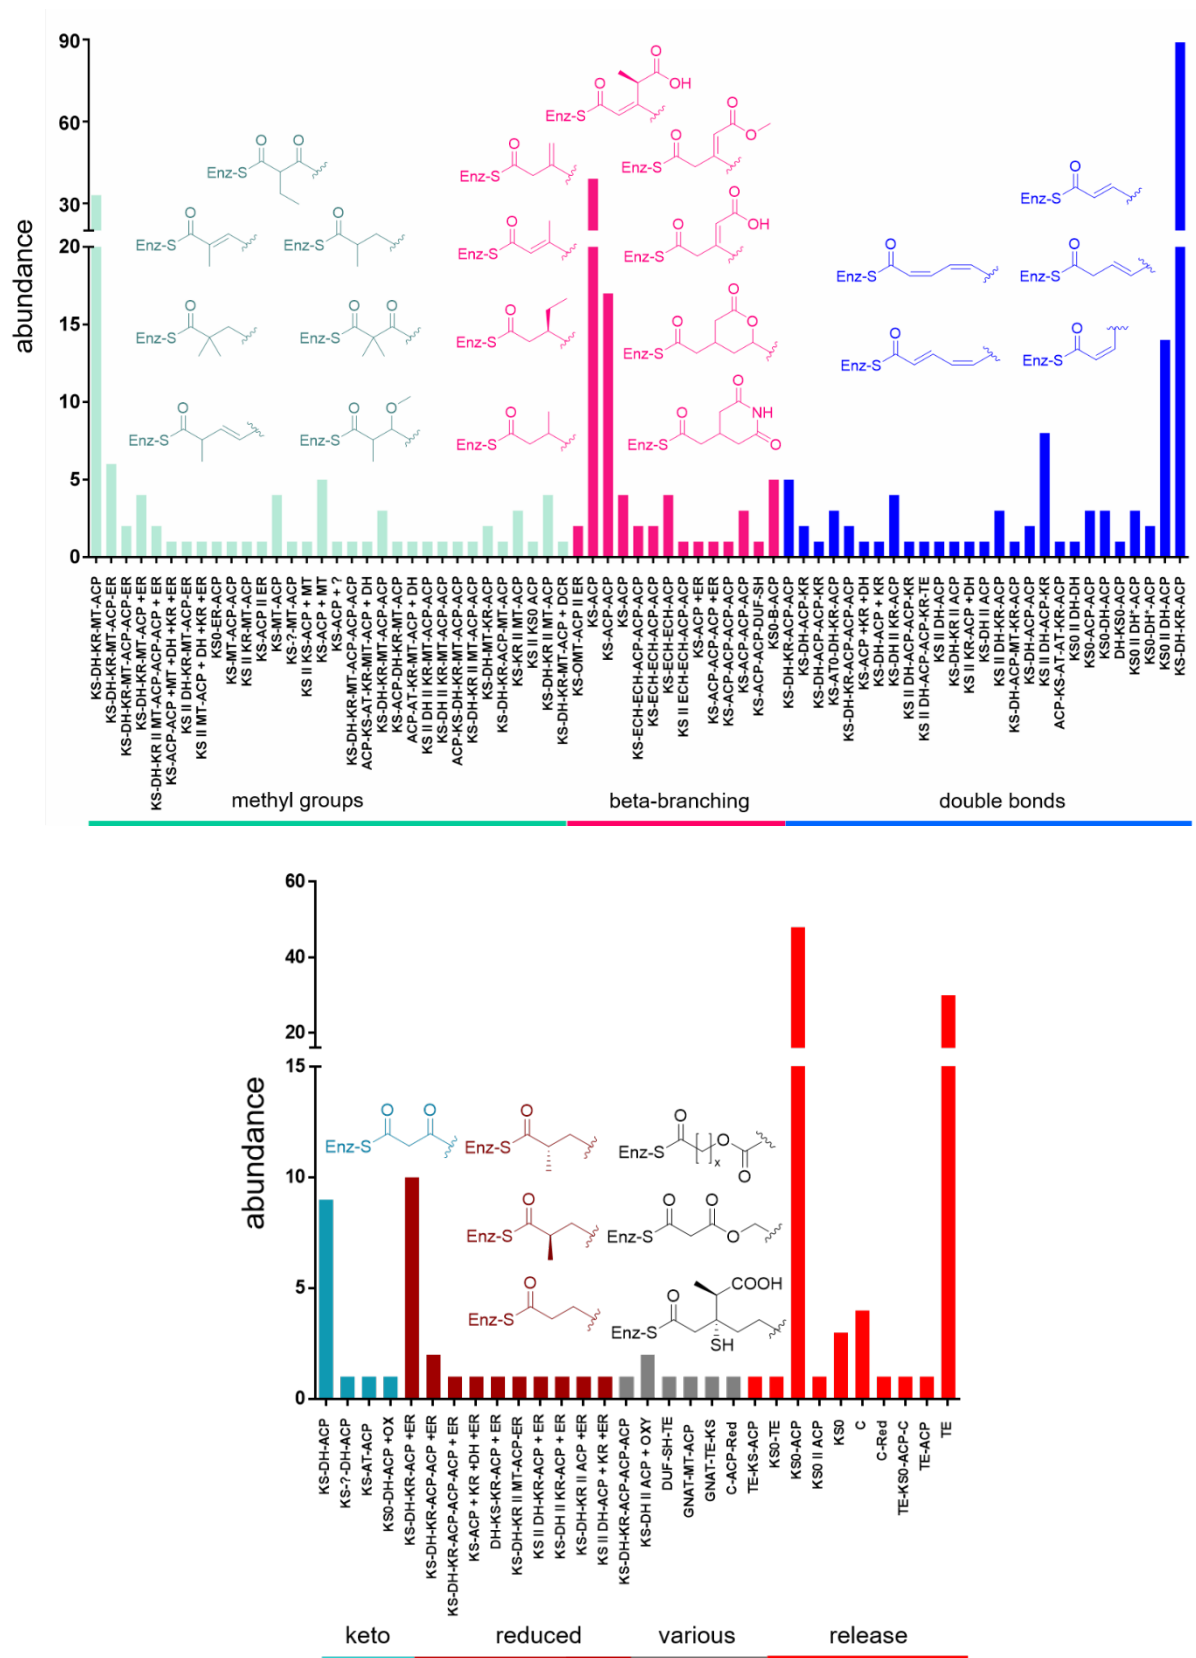

**Supplementary Figure 2: Module variants encountered in *trans*-AT PKSs.** Module variants were extracted and quantified from all annotated *trans*-AT PKS BGCs as described by Helfrich and Piel 2016<sup>5</sup> and Piel 2010.<sup>2</sup> Module variants are grouped according to the modifications introduced into the polyketide backbone. "+" in module descriptors signifies non-covalent interactions with *trans*-acting enzymes. OXY: oxygenase, PAL: phenylalanine ammonia lyase, DUF: domain of unknown function, SH: cysteine lyase, DCR: 2,4-dienoyl-CoA reductase.

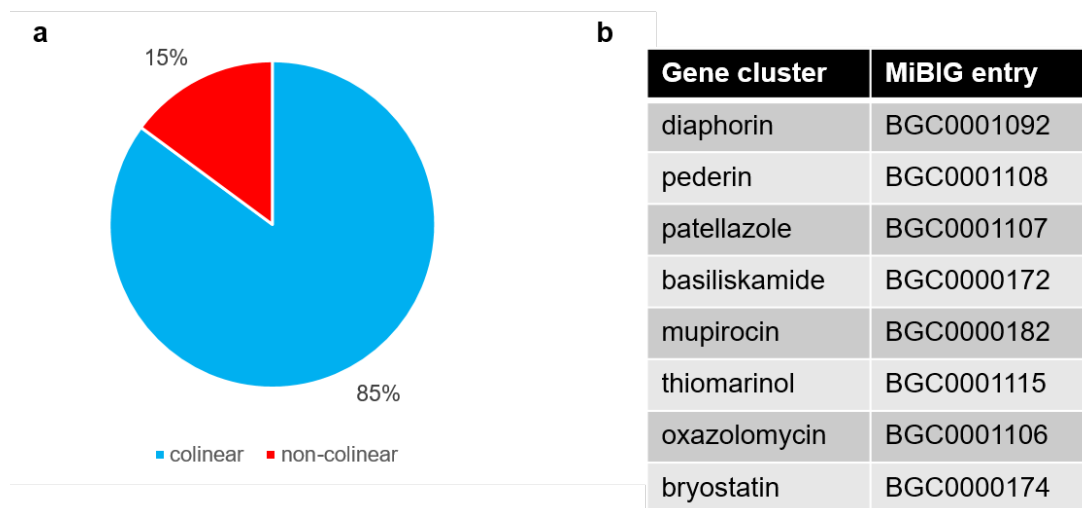

**Supplementary Figure 3: Colinearity between gene order in the BGC and protein order during polyketide biosynthesis in 54 characterized *trans*-AT PKS clusters. (a)** Colinearity between PKS genes and order at the protein level. **(b)** Table of all characterized *trans*-AT PKS BGCs that do not show a colinearity between gene order and order of the corresponding proteins in the PKS.

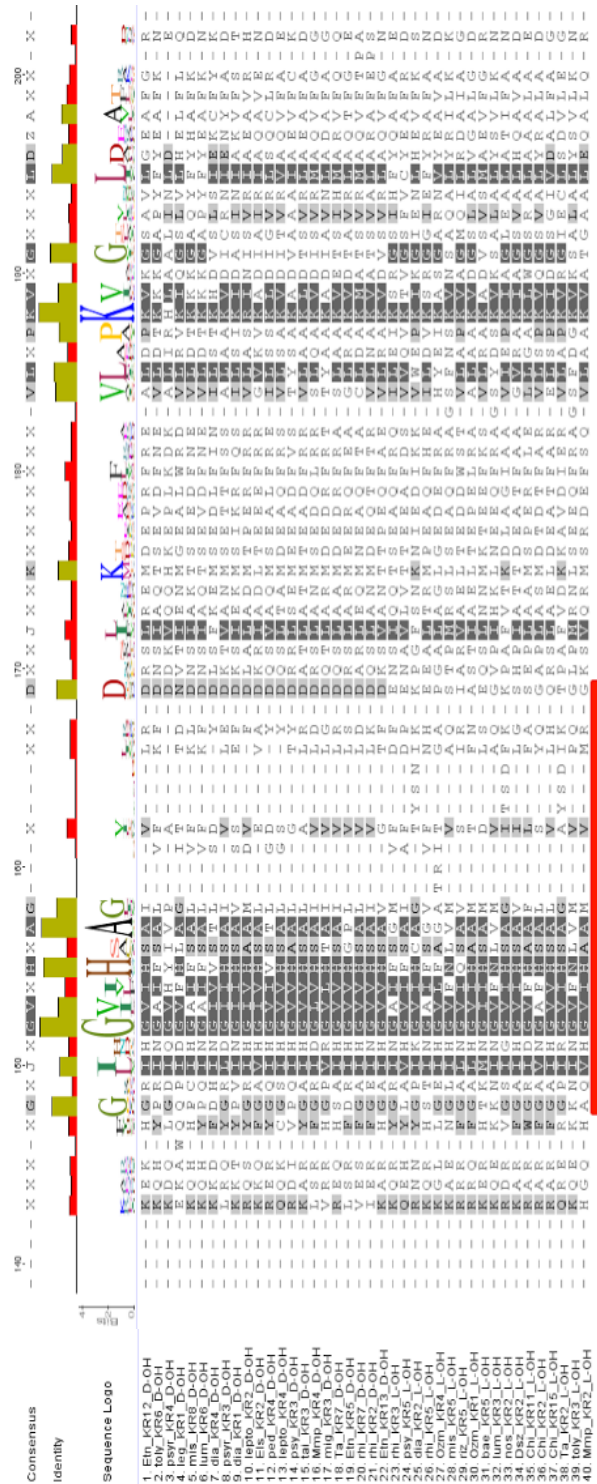

**Supplementary Figure 4: KR alignment around the fuzzpro pattern used to distinguish between D-OH and L-OH groups.** Red bar: KR Fuzzpro pattern used. Blue bar: Stereochemistry-determining residue with D (Asp) forming D-configured OH groups and all other amino acids giving rise to L-OH groups. Fuzzpro pattern:  $[GDPSE RVIHK NAT]_x(3)[GVTA][IVAL][VHILF][HYFVQY][SIATGMLCFNV][AVTSP][GLIMRP]_x(3)D$ .

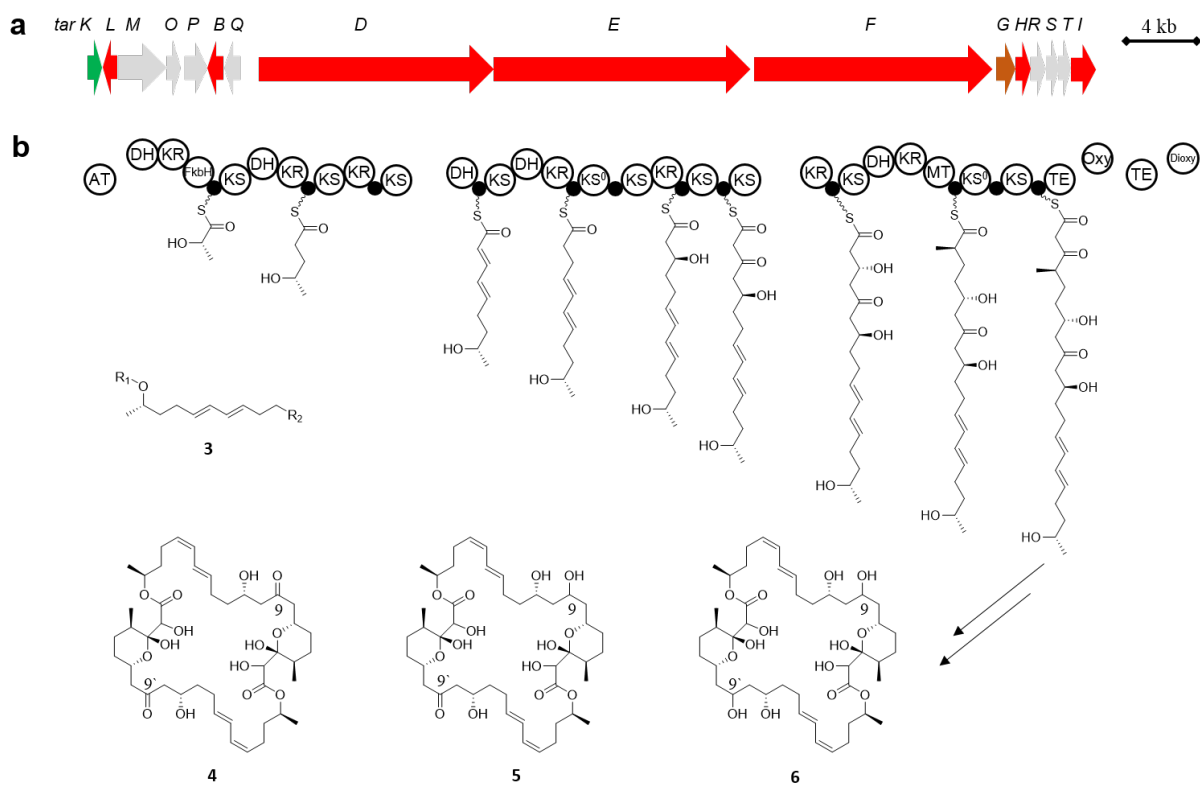

**Supplementary Figure 5: Model for tartrolon biosynthesis. (a)** *tar* BGC. Red: PKS genes, grey: hypothetical genes, brown: oxygenase genes, green: regulatory genes. **(b)** Proposed model for tartrolon biosynthesis, high-confidence part (3) of the structure generated by TransATor and used for MarinLit library search, and isolated homo- and heterodimeric tartrolon D, F and G (4-6).

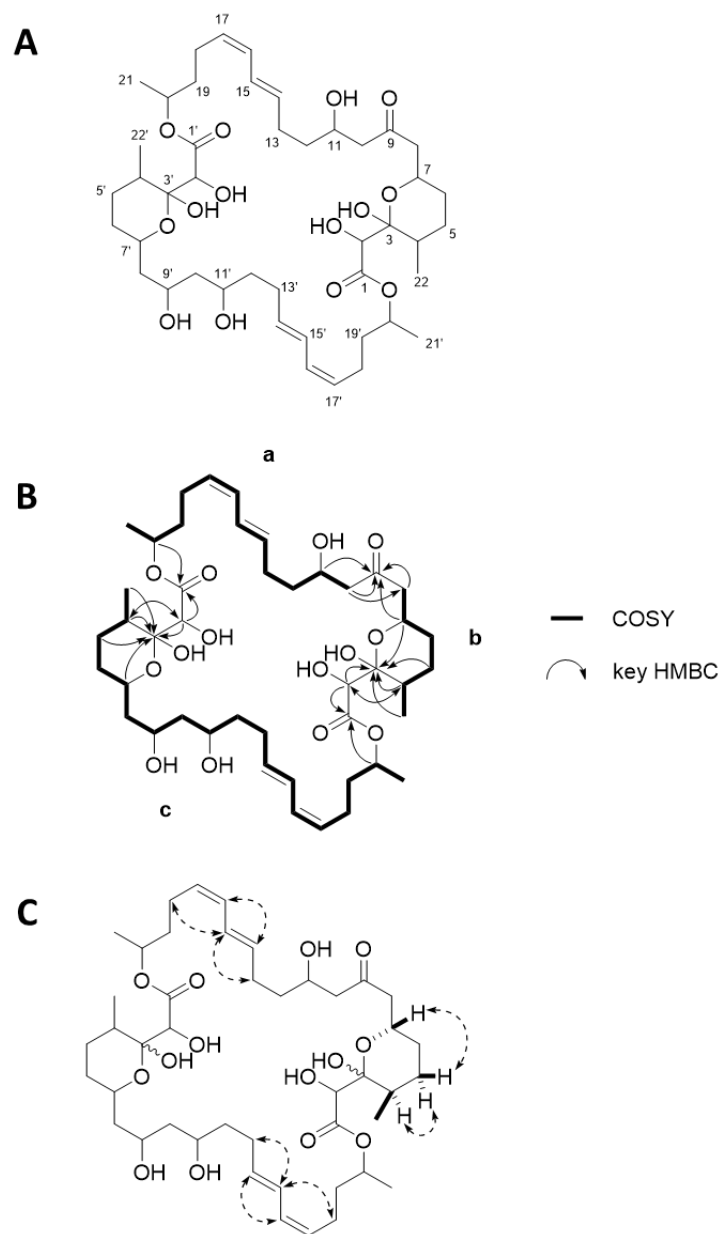

**Supplementary Figure 6: A: Structure of tartrolon F (5). B: COSY and key HMBC correlations of tartrolon F (5). C: Key NOESY correlation of tartrolon F (5).**



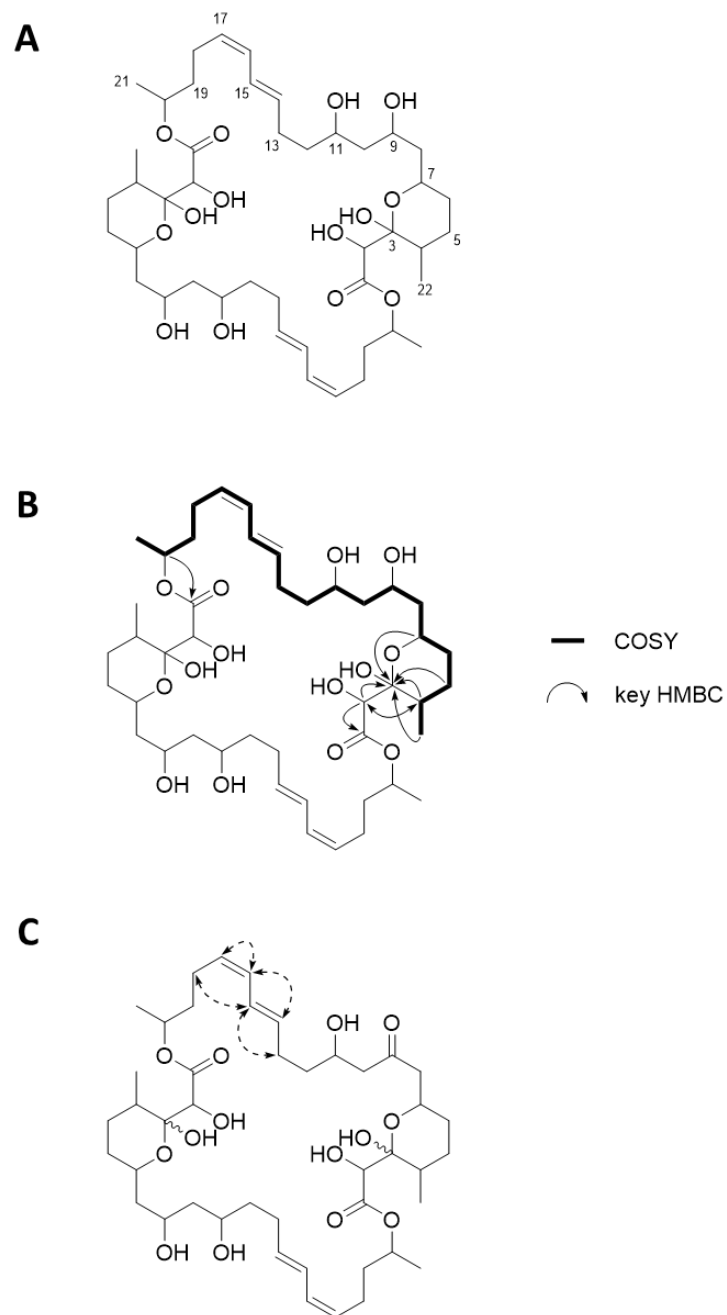

**Supplementary Figure 7: A: Structure of tartrolon G (6). B: COSY and key HMBC correlations of tartrolon G (6). C: Key NOESY correlation of tartrolon G (6).**

**A**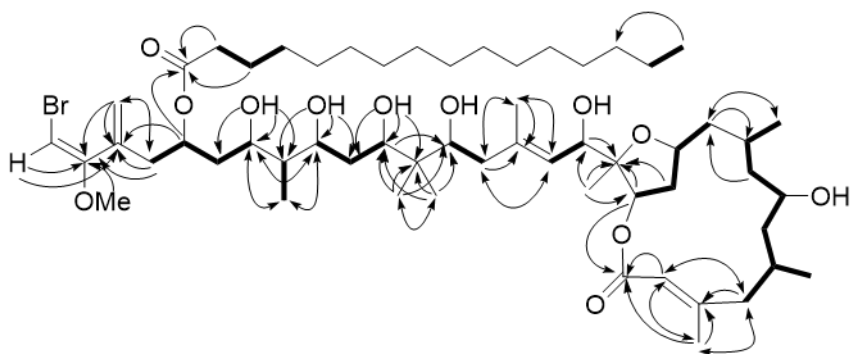

— COSY

↷ key HMBC

**B**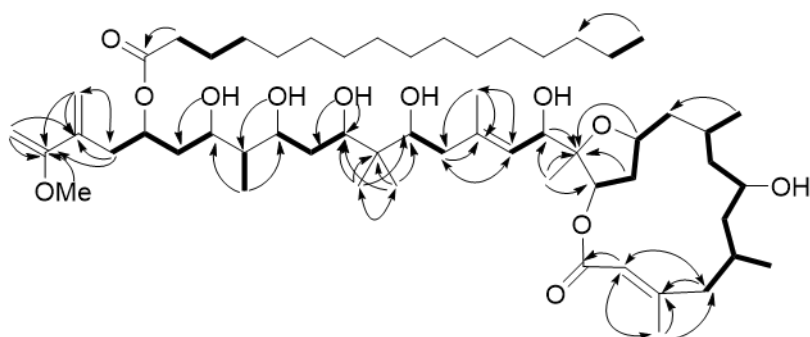**C**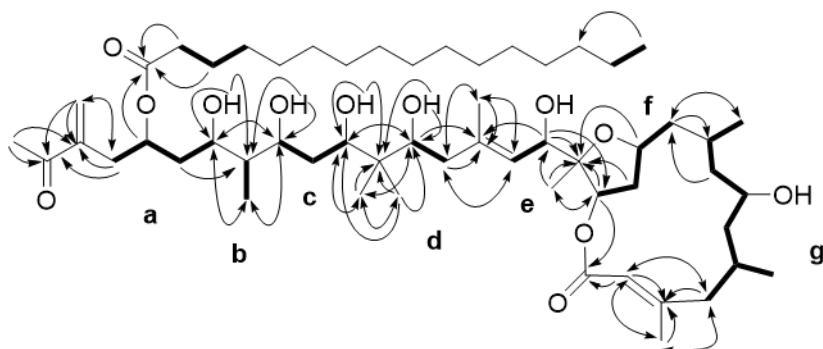

**Supplementary Figure 8: Key NMR correlations of leptolyngbyalide A-C. A: leptolyngbyalide A (10), B: leptolyngbyalide B (11), and C: leptolyngbyalide C (12).**

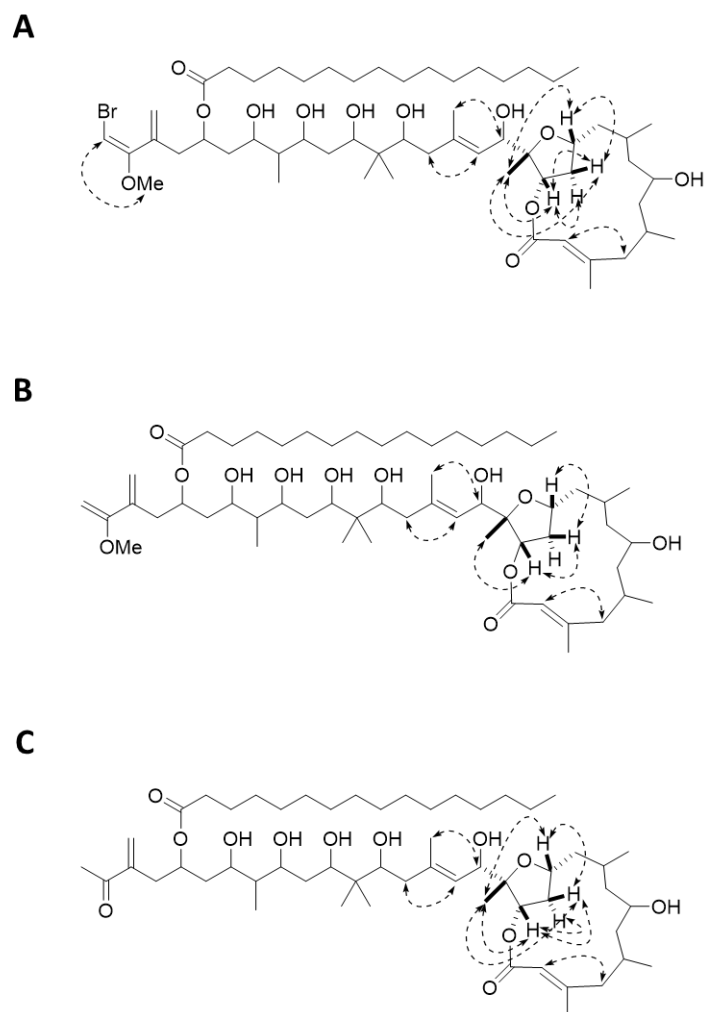

**Supplementary Figure 9: Key NOESY correlations of leptolyngbyalides A-C.** A: leptolyngbyalide A (10), B: leptolyngbyalide B (11), and C: leptolyngbyalide C (12).

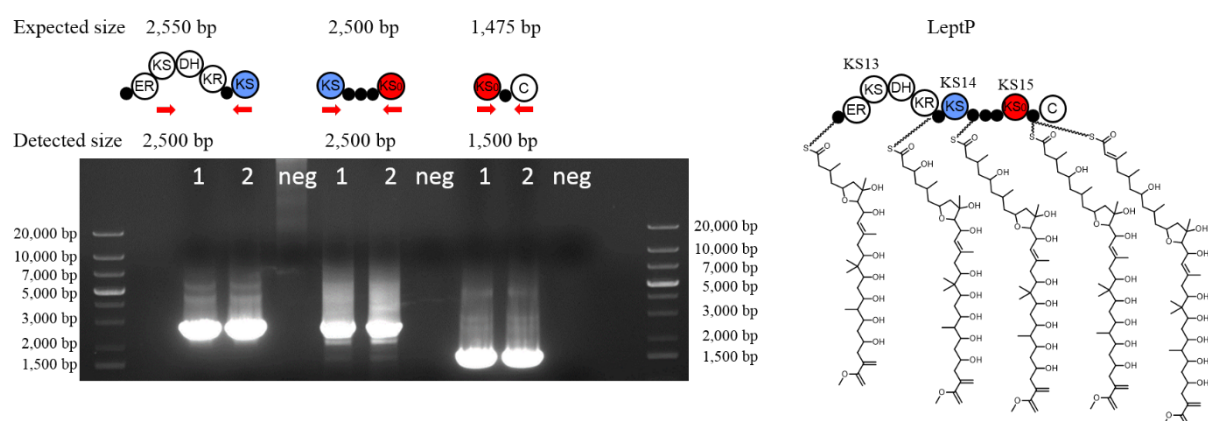

**Supplementary Figure 10: PCR-based verification of the correct assembly of the last PKS gene (*leptP*).** Module 14 is putatively used iteratively and installs two beta branches. PCRs were conducted in duplicates (1-2). Neg: negative control. The detection of PCR fragments of the expected size indicates correct sequence assembly of the *lept* locus. Red arrows indicate translated primer annealing sites on the PKS level for the visualization of the corresponding PKS section and its assigned biosynthetic functions.

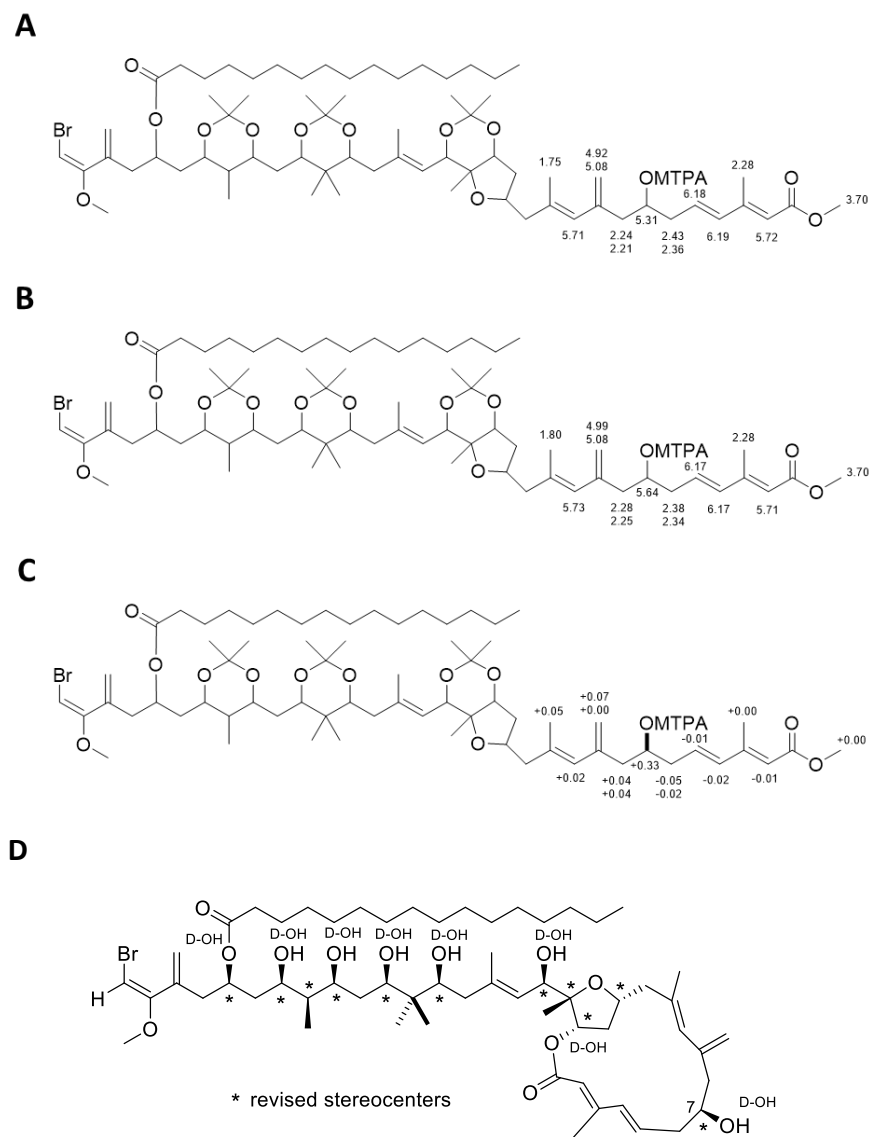

**Supplementary Figure 11: Absolute stereochemistry of phormidolide.**  $^1\text{H}$  NMR chemical shifts of **A**: phormidolide triacetonide methyl ester (*R*)-MTPA ester and **B**: (*S*)-MTPA ester from the literature. **C**:  $\Delta\delta_{S-R}$  values of phormidolide triacetonide methyl ester MTPA ester. **D**: Proposed revised absolute stereochemistry based on TransATor analysis and reexamination of published primary data.<sup>6,7</sup>

**A**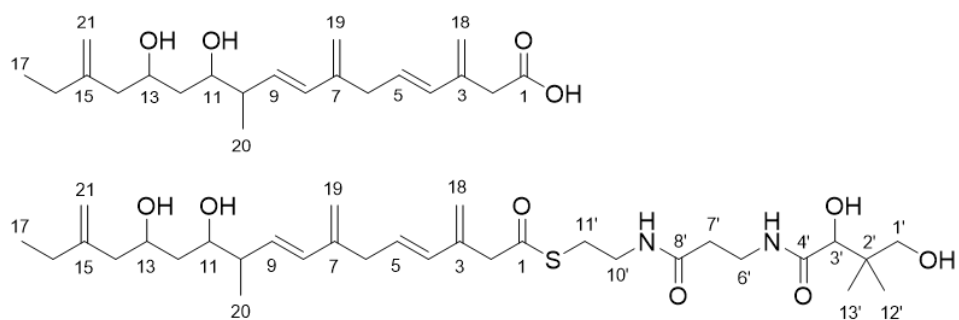**B**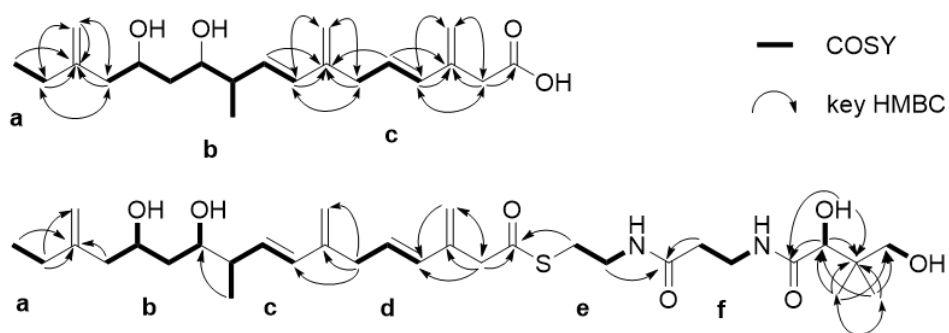

**Supplementary Figure 12: A: Structures of cuniculene 6A (14) and cuniculene 6B (15). B: COSY and key HMBC correlations of cuniculene 6A (14) and 6B (15).**

**Supplementary Table 1: Ubiquitous distribution of *trans*-AT PKS BGCs across bacterial phyla.** Distribution of functionally assigned *trans*-AT PKS BGCs<sup>2,5</sup> for which the corresponding metabolite is characterized versus the distribution of sequenced BGCs as reported by O'Brien *et al.*<sup>4</sup> and based on the AntiSMASH database.<sup>8</sup> This discrepancy between annotated *trans*-AT PKS BGCs and the studies by O'Brien *et al.*<sup>4</sup> and Blin *et al.*<sup>8</sup> is either due to a higher abundance of *trans*-AT PKS BGCs in certain phyla, or due to a general overrepresentation of these genomes in GenBank. Firmicutes, Actinobacteria,  $\beta$ -Proteobacteria and  $\gamma$ -Proteobacteria as well as bacterial phyla not traditionally studied for natural product discovery show a huge potential for the isolation of novel *trans*-AT PKS-derived polyketides.

| Phylum/Class             | Annotated BGCs | Sequenced BGCs (O'Brien <i>et al.</i> ) | Sequenced BGCs (AntiSMASH database) |
|--------------------------|----------------|-----------------------------------------|-------------------------------------|
| Firmicutes               | 9              | 97                                      | 66                                  |
| Actinobacteria           | 15             | 55                                      | 21                                  |
| $\alpha$ -Proteobacteria | 1              | 7                                       | 3                                   |
| $\beta$ -Proteobacteria  | 10             | 37                                      | 107                                 |
| $\delta$ -Proteobacteria | 14             | 14                                      | 7                                   |
| $\gamma$ -Proteobacteria | 17             | 41                                      | 20                                  |
| Bacteroidetes            | 2              | 3                                       | 2                                   |
| Cyanobacteria            | 6              | 5                                       | 2                                   |
| Other                    | 3              | 0                                       | 183                                 |
| total                    | 77             | 259                                     | 411                                 |

**Supplementary Table 2: *trans*-AT PKS ketide clades.** HMMs were trained for each clade and used for TransATor predictions.

| Clade ID | Clade Description                                                        |
|----------|--------------------------------------------------------------------------|
| Clade_1  | GNAT starter                                                             |
| Clade_2  | $\alpha$ -Me shifted double bond or OH                                   |
| Clade_5  | amino acids (oxa/thia)                                                   |
| Clade_7  | $\beta$ D-OH                                                             |
| Clade_8  | unusual starter (AMT/succinate)                                          |
| Clade_9  | aromatic starter                                                         |
| Clade_10 | amino acids (glycine)                                                    |
| Clade_11 | shifted double bonds                                                     |
| Clade_12 | vinyllogous chain branching                                              |
| Clade_13 | lactate starter                                                          |
| Clade_14 | exomethyl/exoester                                                       |
| Clade_21 | $\alpha$ -Me red or keto                                                 |
| Clade_23 | $\alpha$ -Me                                                             |
| Clade_25 | completely reduced                                                       |
| Clade_26 | pyran/furan rings                                                        |
| Clade_27 | acetyl starter                                                           |
| Clade_28 | amino acids                                                              |
| Clade_30 | bimodule $\beta$ D-OH                                                    |
| Clade_31 | non-elongating (bimodule $\beta$ D-OH)                                   |
| Clade_32 | cis-AT PKS                                                               |
| Clade_33 | various starters                                                         |
| Clade_34 | methoxycarbonyl starter                                                  |
| Clade_35 | oxidative rearrangement                                                  |
| Clade_36 | non-elongating (oxazole/thiazole rings)                                  |
| Clade_38 | non-elongating (pyran/furan rings)                                       |
| Clade_39 | amino acids (glycine)                                                    |
| Clade_40 | $\beta$ D-OH or $\beta$ keto                                             |
| Clade_42 | shifted double bonds                                                     |
| Clade_43 | $\alpha$ D-Me shifted double bonds                                       |
| Clade_44 | non-elongating ( $\alpha$ -Me completely reduced or shifted double bond) |

| Clade ID  | Clade Description                                             |
|-----------|---------------------------------------------------------------|
| Clade_81  | non-elongating ( $\beta$ D-OH)                                |
| Clade_82  | double bonds (mostly <i>E</i> -configured)                    |
| Clade_83  | non-elongating (mostly $\alpha$ -Me double bonds)             |
| Clade_84  | non-elongating                                                |
| Clade_85  | non-elongating (bimodule $\beta$ D-OH)                        |
| Clade_86  | $\alpha$ -L-Me red or OH                                      |
| Clade_88  | non-elongating                                                |
| Clade_89  | $\alpha$ -Me $\beta$ -OH                                      |
| Clade_90  | $\beta$ -keto or double bonds                                 |
| Clade_92  | non-elongating ( $\alpha$ D-OH $\beta$ -L-OH)                 |
| Clade_93  | non elongating ( $\beta$ -OH)                                 |
| Clade_94  | non-elongating (various)                                      |
| Clade_95  | various specificities                                         |
| Clade_96  | various specificities (mainly $\alpha$ -Me)                   |
| Clade_97  | $\beta$ D-OH                                                  |
| Clade_98  | non-elongating (various)                                      |
| Clade_99  | double bonds ( <i>E</i> -configured)                          |
| Clade_100 | mainly double bonds                                           |
| Clade_101 | double bonds                                                  |
| Clade_102 | $\beta$ D-OH                                                  |
| Clade_103 | $\beta$ OMe                                                   |
| Clade_104 | $\beta$ OMe or $\beta$ Me double bond                         |
| Clade_106 | lactate starter                                               |
| Clade_107 | mainly reduced                                                |
| Clade_108 | shifted double bonds                                          |
| Clade_109 | completely reduced                                            |
| Clade_110 | $\beta$ D-OH or double bonds ( <i>e</i> -configured)          |
| Clade_111 | $\alpha$ L-(di)Me $\beta$ OH                                  |
| Clade_112 | $\alpha$ L-(di)Me $\beta$ OH                                  |
| Clade_113 | double bonds ( <i>e</i> -configured) (some with $\alpha$ -Me) |

|           |                                                               |
|-----------|---------------------------------------------------------------|
| Clade_45  | non-elongating ( $\beta$ -keto)                               |
| Clade_46  | non-elongating (hemiacetal)                                   |
| Clade_47  | amino acids (oxazole/thiazole rings)                          |
| Clade_49  | shifted double bonds (some with $\alpha$ -Me)                 |
| Clade_51  | double bonds ( <i>Z</i> -configured)                          |
| Clade_52  | $\alpha$ -Me double bond                                      |
| Clade_53  | $\beta$ D-OH                                                  |
| Clade_54  | lactate starter                                               |
| Clade_55  | $\alpha$ -Me double bonds ( <i>E</i> -configured)             |
| Clade_56  | $\alpha$ -Me double bonds ( <i>Z</i> -configured)             |
| Clade_57  | double bonds ( <i>E</i> -configured) (some with $\alpha$ -Me) |
| Clade_60  | double bonds ( <i>Z</i> -configured)                          |
| Clade_61  | $\alpha$ L-Me $\beta$ D-OH                                    |
| Clade_62  | $\beta$ D-OH (some with $\alpha$ L-Me)                        |
| Clade_64  | non-elongating (double bonds (mostly <i>Z</i> -configured))   |
| Clade_65  | double bonds                                                  |
| Clade_66  | $\beta$ L-OH                                                  |
| Clade_67  | phosphoglycerate-derived starters                             |
| Clade_68  | $\alpha$ L-OH/Me $\beta$ D-OH                                 |
| Clade_70  | $\alpha$ OH $\beta$ D-OH                                      |
| Clade_72  | $\alpha$ L-(di)Me $\beta$ OH                                  |
| Clade_73  | Exomethylene                                                  |
| Clade_74  | $\alpha$ Me $\beta$ OH                                        |
| Clade_75  | non-elongating ( $\beta$ L-OH)                                |
| Clade_76  | non-elongating (double bonds)                                 |
| Clade_77  | vinylous chain branching                                      |
| Clade_78  | non-elongating (mostly $\beta$ OH)                            |
| Clade_79  | starters or $\beta$ OH                                        |
| Clade_80  | non-elongating ( $\beta$ OH)                                  |
| Clade_114 | $\beta$ L-OH                                                  |
| Clade_115 | $\beta$ -keto or double bonds                                 |
| Clade_116 | $\beta$ -keto or double bonds                                 |
| Clade_117 | $\alpha$ -Me red or keto                                      |
| Clade_118 | mainly double bonds                                           |
| Clade_119 | non elongating ( $\beta$ -OH)                                 |
| Clade_120 | non-elongating (various)                                      |
| Clade_121 | $\alpha$ D-OH $\beta$ D-OH                                    |
| Clade_122 | double bonds ( <i>E</i> -configured) (some with $\alpha$ -Me) |
| Clade_123 | $\beta$ D-OH                                                  |
| Clade_124 | $\beta$ D-OH                                                  |
| Clade_125 | double bonds ( <i>E</i> -configured)                          |
| Clade_126 | double bonds ( <i>E</i> -configured)                          |
| Clade_127 | double bonds ( <i>E</i> -configured)                          |
| Clade_128 | double bonds ( <i>E</i> -configured)                          |
| Clade_129 | double bonds ( <i>E</i> -configured)                          |
| Clade_130 | double bonds ( <i>E</i> -configured)                          |
| Clade_131 | $\alpha$ -Me double bonds ( <i>Z</i> -configured)             |
| Clade_132 | $\alpha$ -Me double bonds ( <i>E</i> -configured)             |
| Clade_133 | $\alpha$ -Me double bonds ( <i>E</i> -configured)             |
| Clade_134 | double bonds ( <i>E</i> -configured)                          |
| Clade_135 | $\beta$ D-OH                                                  |
| Clade_136 | $\beta$ D-OH                                                  |
| Clade_137 | $\beta$ D-OH                                                  |
| Clade_138 | $\alpha$ L-Me $\beta$ OH                                      |
| Clade_139 | $\beta$ OH                                                    |
| Clade_140 | $\beta$ D-OH                                                  |
| Clade_141 | $\alpha$ -Me double bonds                                     |
| Clade_142 | non-elongating (various)                                      |

**Supplementary Table 3: Annotation of KS sequences based on their respective ketide clades.** Sequence names contain the following descriptors: name of the corresponding polyketide\_protein harboring the respective KS\_number of KS on the respective protein\_KS number when counting from first KS of the pathway\_substrate specificity.

| Sequence                                     | Clade     |
|----------------------------------------------|-----------|
| >basiliskamides_P615_14890_KS5_eDB           | Clade_1   |
| >kalimantacin_batumin_Bat1_1_KS1_AcStarter   | Clade_1   |
| >diaphorin_DipP_1_KS1_GNATstarter            | Clade_1   |
| >nosperin_NspA_1_KS1_GNATstarter             | Clade_1   |
| >onnamide_OnnB_1_KS1_GNATstarter             | Clade_1   |
| >pederin_PedI_1_KS1_GNATstarter              | Clade_1   |
| >psymberin_PsyA_1_KS1_GNATstarter            | Clade_1   |
| >bryostatin_BryX_1_KS14_GNATstarter          | Clade_1   |
| >oxazolomycin_OzmH_2_KS6_AAgly               | Clade_10  |
| >luminaolid_LumA_1_KS1_AAgly                 | Clade_10  |
| >tolytoxin_TtoC_1_KS1_AAgly                  | Clade_10  |
| >griseoviridin_SgvE2_2_KS4_eDB               | Clade_100 |
| >virginiamycin_VirA_4_KS4_eDB                | Clade_100 |
| >tartrolon_TrtF_1_KS9_b_D_OH                 | Clade_100 |
| >oxazolomycin_OzmN_2_KS3_eDB                 | Clade_101 |
| >kirromycin_KirAIV_1_KS7_eDB                 | Clade_101 |
| >kirromycin_KirAIV_2_KS8_aMeeDB              | Clade_101 |
| >leinamycin_LnmI_2_KS2_AAoxz                 | Clade_101 |
| >rhizopodin_RizD_5_KS15_bimod_bOH            | Clade_101 |
| >luminaolid_LumD_3_KS13_b_D_OH               | Clade_102 |
| >tolytoxin_TtoE_7_KS13_b_D_OH.               | Clade_102 |
| >misakinolide_MisE_3_KS13_b_D_OH             | Clade_102 |
| >luminaolid_LumE_3_KS17_b_D_OH               | Clade_102 |
| >tolytoxin_TtoF_3_KS17_b_D_OH                | Clade_102 |
| >misakinolide_MisF_3_KS17_b_D_OH             | Clade_102 |
| >bryostatin_BryD_2_KS13_0b_D_OH              | Clade_102 |
| >onnamide_OnnI_3_KS6_b_D_OH                  | Clade_102 |
| >bryostatin_BryA_KS3_3_b_D_OH                | Clade_102 |
| >phormidolide_EKU96423_PhorL_1_KS4_aMeb_D_OH | Clade_102 |
| >etnangien_EtnG_3_KS13_b_L_OMe               | Clade_103 |
| >luminaolid_LumD_2_KS12_b_D_OMe              | Clade_103 |
| >misakinolide_MisE_2_KS12_b_D_OMe            | Clade_103 |
| >tolytoxin_TtoE_6_KS12_b_D_OMe.              | Clade_103 |
| >calyculin_CalE_7_KS15_b_L_OH.               | Clade_103 |
| >calyculin_CalF_4_KS19_b_D_OMe.              | Clade_103 |
| >sorangicin_SorG_2_KS19_b_L_OH               | Clade_103 |
| >oxazolomycin_OzmK_1_KS12_a_L_OMe            | Clade_103 |
| >corallopyronin_CorL_3_KS12_bMeDB            | Clade_104 |
| >myxopyronin_MxnK_4_KS10_bMeDB               | Clade_104 |
| >luminaolid_LumB_1_KS4_a_D_Meb_D_OMe         | Clade_104 |
| >tolytoxin_TtoD_1_KS4_a_D_Meb_D_OMe          | Clade_104 |
| >misakinolide_MisC_4_KS4_bOMe                | Clade_104 |
| >rhizopodin_RizD_4_KS14_b_D_OMe              | Clade_104 |
| >rhizopodin_RizB_4_KS4_a_D_Meb_D_OMe         | Clade_104 |
| >rhizopodin_RizB_8_KS8_b_D_OMe               | Clade_104 |
| >rhizopodin_RizE_2_KS18_b_L_OMe              | Clade_104 |
| >etnangien_EtnI_1_KS17_reda_L_Me             | Clade_104 |
| >griseoviridin_SgvE3_1_KS5_eDB               | Clade_104 |
| >virginiamycin_VirF_1_KS5_bMeeDB             | Clade_104 |
| >paenimacrolidin_KS2_DB                      | Clade_108 |
| >oocydin_Smar_OocR_2_KS12_shDB               | Clade_108 |
| >oocydin_Ddad_OocR_2_KS12_shDB               | Clade_108 |
| >rhizoxins_RhiD_2_KS10_shD                   | Clade_108 |



|                                                 |           |
|-------------------------------------------------|-----------|
| >corallopyronin_CorL_2_KS11_red                 | Clade_109 |
| >myxopyronin_MxnK_3_KS9_red                     | Clade_109 |
| >macrolactin_MlnB_3_KS3_red                     | Clade_109 |
| >corallopyronin_CorK_3_KS9_red                  | Clade_109 |
| >rhizopodin_RizB_2_KS2_eDB                      | Clade_109 |
| >bacillaene_Bamy_BaeN_2_KS11_shDB               | Clade_11  |
| >bacillaene_Bsub_PksN_2_KS12_shDB               | Clade_11  |
| >bacillaene_Bamy_BaeN_3_KS12_shDB               | Clade_11  |
| >bacillaene_Bsub_PksN_3_KS13_shDB               | Clade_11  |
| >9methylstreptimidone_Smdl_4_KS4_eDB            | Clade_110 |
| >cycloheximide_ChxE_4_KS4_b_D_OH                | Clade_110 |
| >dorrigocin_migrastatin_MgsF_1_KS4_b_D_OH_eDB   | Clade_110 |
| >onnamide_OnnI_4_KS7_adiMeb_D_OH                | Clade_111 |
| >psymberin_PsyD_4_KS6_adiMeb_D_OH               | Clade_111 |
| >phormidolide_EKU96423_PhorL_3_KS6_adiMeb_D_OH  | Clade_111 |
| >rhizoxins_RhiD_1_K9_aMeb_D_OH                  | Clade_111 |
| >calyculin_CalG_1_KS21_a_L_Meb_L_OH             | Clade_111 |
| >luminaolid_LumC_4_KS10_a_L_Meb_L_OH            | Clade_112 |
| >tolytoxin_TtoE_4_KS10_a_L_Meb_L_OH             | Clade_112 |
| >misakinolide_MisD_4_KS10_a_L_Meb_L_OH          | Clade_112 |
| >calyculin_CalE_4_KS13_b_L_OH                   | Clade_112 |
| >rhizoxins_RhiC_2_KS7_a_D_Meb_L_OH              | Clade_112 |
| >psymberin_PsyD_6_KS8_a_D_Meb_L_OH              | Clade_112 |
| >calyculin_CalF_5_KS20_a_L_Meb_L_OH             | Clade_112 |
| >sorangicin_SorA_4_KS4_aMeeDB                   | Clade_113 |
| >sorangicin_SorC_1_KS12_eDB                     | Clade_113 |
| >elansolid_Csan_ElaQ_2_KS12_b_L_OH              | Clade_114 |
| >elansolid_Cpin_ElsP_2_KS12_b_L_OH              | Clade_114 |
| >thailandamide_TaiD_2_KS2_b_L_OH                | Clade_114 |
| >disorazole_DszB_1_KS5_zDB                      | Clade_115 |
| >disorazole_DszB_2_KS6_zDB                      | Clade_115 |
| >SIA7248_SiaF_2_KS5_b_D_OH                      | Clade_115 |
| >rhizopodin_RizB_5_KS5_bketo                    | Clade_115 |
| >chlorotonil_CtoD_2_KS6_eDB                     | Clade_115 |
| >SIA7248_SiaG_2_KS9_eDB                         | Clade_115 |
| >legioliulin_LglD_4_KS4_bketo                   | Clade_115 |
| >SIA7248_SiaH_KS12_bketo                        | Clade_115 |
| >thailandamide_TaiL_2_KS10_bketo                | Clade_116 |
| >psymberin_PsyD_8_KS10_aMebketo                 | Clade_116 |
| >dorrigocin_migrastatin_MgsF_3_KS6_aMeeDB       | Clade_116 |
| >basiliskamides_P615_BasF_1_KS1_GNATstarter     | Clade_117 |
| >basiliskamides_P615_BasE_1_KS2_a_L_Me_red      | Clade_117 |
| >elansolid_Csan_ElaK_2_KS4_aMe                  | Clade_117 |
| >elansolid_Cpin_ElsJ_2_KS4_aMe                  | Clade_117 |
| >elansolid_Csan_ElaK_1_KS3_adiMeb_D_OH          | Clade_117 |
| >elansolid_Cpin_ElsJ_1_KS3_adiMeb_D_OH          | Clade_117 |
| >difficidin_DifL_1_KS14_redaMe                  | Clade_117 |
| >calyculin_CalE_6_KS16_adiMbketo                | Clade_117 |
| >sorangicin_SorA_3_KS3_reda_D_Me                | Clade_117 |
| >myxovirescin_TaP_1_KS1_reda_D_Me               | Clade_117 |
| >paenimacrolidin_KS3_bMe                        | Clade_117 |
| >paenimacrolidin_KS4_bMe                        | Clade_117 |
| >bryostatin_BryB_2_KS5_adiMEbketo               | Clade_117 |
| >bryostatin_BryC_3_KS10_adiMEbketo              | Clade_117 |
| >corallopyronin_CorK_2_KS8_eDB                  | Clade_118 |
| >myxopyronin_MxnK_2_KS8_0red                    | Clade_118 |
| >disorazole_DszA_2_KS2_eDB                      | Clade_118 |
| >disorazole_DszB_4_KS8_0zDB                     | Clade_118 |
| >difficidin_DifF_1_KS1_unusualStarters_acryloyl | Clade_118 |

|                                                    |           |
|----------------------------------------------------|-----------|
| >calyculin_CalE_2_KS11_aketo                       | Clade_118 |
| >9methylstreptimidone_Smdl_3_KS3_vinylogous        | Clade_12  |
| >cycloheximide_ChxE_3_KS3_vinylogous               | Clade_12  |
| >dorrigin_migrastatin_MgsE_3_KS3_vinylogous        | Clade_12  |
| >tartrolon_TrtrF_2_KS10_0reda_D_Me                 | Clade_120 |
| >griseoviridin_SgvE4_1_KS7_b_D_OH                  | Clade_120 |
| >virginiamycin_VirH_1_KS7_0AAoxz                   | Clade_120 |
| >mupirocin_MmpA_2_KS6_a_D_OHb_D_OH                 | Clade_121 |
| >thiomarinol_TmpA_2_KS6_a_D_OHb_D_OH               | Clade_121 |
| >calyculin_CalF_2_KS17_a_D_OHb_D_OH                | Clade_121 |
| >myxovirescin_Ta1_4_KS4_b_L_OH                     | Clade_121 |
| >chivosazole_ChiC_4_KS7_eDB                        | Clade_122 |
| >lankacidin_LkcC_1_KS2_aMeeDB                      | Clade_122 |
| >leinamycin_LnmJ_3_KS6_aMeDB                       | Clade_122 |
| >diaphorin_DipT_3_KS6_b_D_OH                       | Clade_123 |
| >pederin_PedF_3_KS6_b_D_OH                         | Clade_123 |
| >thiomarinol_TmpA_3_KS7_bOH                        | Clade_124 |
| >mupirocin_MmpA_3_KS7_b_D_OH                       | Clade_124 |
| >SIA7248_SiaG_3_KS10_eDB                           | Clade_125 |
| >myxovirescin_Ta1_7_KS7_eDB                        | Clade_125 |
| >thailandamide_TaiL_4_KS12_eDB                     | Clade_125 |
| >legioliulin_LglD_2_KS2_eDB                        | Clade_126 |
| >chlorotonil_CtoE_1_KS9_DB_DA                      | Clade_126 |
| >rhizopodin_RizD_6_KS16_eDB                        | Clade_126 |
| >mupirocin_MmpB_1_KS8_esterification               | Clade_126 |
| >chivosazole_ChiC_3_KS6_eDB_zDB                    | Clade_127 |
| >disorazole_DszB_3_KS7_eDB                         | Clade_127 |
| >chlorotonil_CtoD_1_KS5_eDB                        | Clade_127 |
| >chivosazole_ChiF_3_KS17_eDB_zDB                   | Clade_127 |
| >kirromycin_KirAV_1_KS12_eDB                       | Clade_128 |
| >anthracimycin_AtcE_KS6_eDB                        | Clade_128 |
| >anthracimycin_AtcE_KS5_eDB                        | Clade_128 |
| >lankacidin_LkcF_1_KS3_b_D_OH.                     | Clade_128 |
| >oxazolomycin_OzmH_3_KS7_eDB                       | Clade_128 |
| >anthracimycin_AtcF_2_KS9_eDB_DA                   | Clade_128 |
| >thiomarinol_TmpB_1_KS8_eDBbMe                     | Clade_129 |
| >thiomarinol_TmpD_3_KS3_eDB                        | Clade_129 |
| >mupirocin_MmpD_3_KS3_eDB                          | Clade_129 |
| >tartrolon_TrtrD_1_KS1_unusualStarter_lactate      | Clade_13  |
| >SIA7248_SiaD_1_KS1_unusualStarter_lactate         | Clade_13  |
| >FR901464_Fr9C_1_KS1_unusualstarter_lactate        | Clade_13  |
| >thailanstatin_TstC_1_KS1_lactateStarter           | Clade_13  |
| >bryostatin_BryA_1_KS1_lactateStarter              | Clade_13  |
| >etnangien_EtnH_2_KS16_eDB                         | Clade_130 |
| >kirromycin_KirAll_1_KS3_eDB                       | Clade_130 |
| >bacillaene_Bamy_BaeM_2_KS9_zDBaMe                 | Clade_131 |
| >bacillaene_Bsub_PksM_2_KS9_zDBaMe                 | Clade_131 |
| >difficidin_DifI_1_KS7_aMezDB                      | Clade_131 |
| >calyculin_CalG_2_KS22_aMeDB                       | Clade_132 |
| >albicidin_Albi_2_KS2_aMeeDB                       | Clade_132 |
| >FR901464_Fr9F_4_KS7_aMeeDB                        | Clade_133 |
| >thailanstatin_TstDEF_4_KS7_aMeeDB                 | Clade_133 |
| >malleilactone_burkholderic_acid_BurF_2_KS2_aMeeDB | Clade_133 |
| >thailandamide_TaiM_3_KS15_aMeeDB                  | Clade_133 |
| >chlorotonil_CtoC_3_KS3_eDB                        | Clade_134 |
| >anthracimycin_AtcD_3_KS3_eDB                      | Clade_134 |
| >FR901464_Fr9H_3_KS9_b_D_OH                        | Clade_135 |
| >thailanstatin_TstGH_2_KS9_b_D_OH                  | Clade_135 |
| >rhizopodin_RizB_1_KS1_AAgly                       | Clade_136 |

|                                                   |           |
|---------------------------------------------------|-----------|
| >disorazole_DszA_4_KS4_b_D_OH                     | Clade_136 |
| >chivosazole_ChiB_2_KS2_b_D_OH                    | Clade_136 |
| >kirromycin_KirAll_3_KS5_b_D_OH                   | Clade_136 |
| >thailandamide_TaiL_3_KS11_b_D_OH                 | Clade_137 |
| >psymberin_PsyD_3_KS5_b_D_OH                      | Clade_137 |
| >basiliskamides_P615_BasE_2_KS3_a_D_Meb_D_OH      | Clade_137 |
| >oocydin_Smar_OocS_1_KS13_aMebOH                  | Clade_138 |
| >oocydin_Ddad_OocS_1_KS13_aMebOH                  | Clade_138 |
| >diaphorin_DipT_4_KS7_adiMebOH                    | Clade_138 |
| >pederin_PedF_4_KS7_adiMeb_D_OH                   | Clade_138 |
| >luminaolid_LumC_1_KS7_a_L_Meb_L_OME_a_L_Meb_L_OH | Clade_138 |
| >tolytoxin_TtoE_1_KS7_a_D_Meb_D_OH                | Clade_138 |
| >mupirocin_MmpA_KS2_b_D_OH                        | Clade_138 |
| >thiomarinol_TmpD_2_KS2_a_L_Meb_L_OH              | Clade_138 |
| >onnamide_OnnI_4_KS7_adiMeb_D_OH                  | Clade_138 |
| >luminaolid_LumC_4_KS10_a_L_Meb_L_OH              | Clade_138 |
| >tolytoxin_TtoE_4_KS10_a_L_Meb_L_OH               | Clade_138 |
| >misakinolide_MisD_4_KS10_a_L_Meb_L_OH            | Clade_138 |
| >psymberin_PsyD_4_KS6_adiMeb_D_OH                 | Clade_138 |
| >phormidolide_EKU96423_PhorL_3_KS6_adiMeb_D_OH    | Clade_138 |
| >calyculin_CalE_4_KS13_b_L_OH                     | Clade_138 |
| >rhizoxins_RhiC_2_KS7_a_D_Meb_L_OH                | Clade_138 |
| >rhizoxins_RhiD_1_K9_aMeb_D_OH                    | Clade_138 |
| >psymberin_PsyD_6_KS8_a_D_Meb_L_OH                | Clade_138 |
| >calyculin_CalF_5_KS20_a_L_Meb_L_OH               | Clade_138 |
| >calyculin_CalG_1_KS21_a_L_Meb_L_OH               | Clade_138 |
| >bacillaene_Bsub_PksM_3_KS10_bOH                  | Clade_139 |
| >oocydin_Smar_OocS_3_KS15_0b_L_OH                 | Clade_139 |
| >oocydin_Ddad_OocS_3_KS15_0b_L_OH                 | Clade_139 |
| >elansolid_Csan_ElaP_2_KS9_0bimod_bOH             | Clade_139 |
| >elansolid_Cpin_ElsO_2_KS9_0bimod_bOH             | Clade_139 |
| >etnangien_EtnF_3_KS10_b_L_OH                     | Clade_139 |
| >etnangien_EtnG_2_KS12_0b_L_OH                    | Clade_139 |
| >etnangien_EtnI_4_KS20_0b_L_OH                    | Clade_139 |
| >bongkrekcic_acid_BonA_4_KS4_b_L_OH               | Clade_139 |
| >bryostatin_BryA_2_KS2_b_L_OH                     | Clade_139 |
| >bryostatin_BryD_1_KS12_b_L_OH                    | Clade_139 |
| >bryostatin_BryB_4_KS7_b_L_OH                     | Clade_139 |
| >phormidolide_EKU96420_PhorO_3_KS11_b_L_OH        | Clade_139 |
| >rhizoxins_RhiE_2_KS13_b_L_OH                     | Clade_139 |
| >diaphorin_DipT_6_KS9_b_L_OH                      | Clade_139 |
| >pederin_PedF_6_KS9_b_L_OH                        | Clade_139 |
| >luminaolid_LumC_3_KS9_b_L_OH                     | Clade_139 |
| >tolytoxin_TtoE_3_KS9_b_L_OH                      | Clade_139 |
| >misakinolide_MisD_3_KS9_b_L_OH                   | Clade_139 |
| >onnamide_OnnI_6_KS9_b_L_OH                       | Clade_139 |
| >kalimantacin_batumin_Bat2_2_KS3_bOH              | Clade_139 |
| >sorangicin_SorA_5_KS5_a_L_OHb_L_OH               | Clade_139 |
| >sorangicin_SorD_2_KS14_b_L_OH                    | Clade_139 |
| >difficidin_DifI_2_KS8_bOH                        | Clade_139 |
| >oocydin_Smar_OocN_3_KS7_b_L_OH                   | Clade_139 |
| >oocydin_Ddad_OocN_3_KS7_b_L_OH                   | Clade_139 |
| >psymberin_PsyD_7_KS9_b_L_OH                      | Clade_139 |
| >elansolid_Csan_ElaQ_2_KS12_b_L_OH                | Clade_139 |
| >elansolid_Cpin_ElsP_2_KS12_b_L_OH                | Clade_139 |
| >thailandamide_TaiD_2_KS2_b_L_OH                  | Clade_139 |
| >SIA7248_SiaF_1_KS4_b_D_OH                        | Clade_139 |
| >SIA7248_SiaF_3_KS6_b_D_OH                        | Clade_139 |
| >SIA7248_SiaF_4_KS7_b_D_OH                        | Clade_139 |

|                                               |           |
|-----------------------------------------------|-----------|
| >SIA7248_SiaE_2_KS3_b_L_OH                    | Clade_139 |
| >SIA7248_SiaE_1_KS2_b_D_OH                    | Clade_139 |
| >FR901464_Fr9H_2_KS10_exometh                 | Clade_14  |
| >thailanstatin_TstGH_3_KS10_exometh           | Clade_14  |
| >bryostatin_BryB_1_KS4_exoester               | Clade_14  |
| >bryostatin_BryC_1_KS8_exoester               | Clade_14  |
| >kalimantacin_batumin_Bat2_4_KS5_redbMe       | Clade_14  |
| >kalimantacin_batumin_Bat3_4_KS11_redbMe      | Clade_14  |
| >psymberin_PsyA_2_KS2_exometh                 | Clade_14  |
| >oocydin_Smar_OocJ_2_KS2_exometh              | Clade_14  |
| >oocydin_Ddad_OocJ_2_KS2_exometh              | Clade_14  |
| >phormidolide_EKU96419_PhorP_1_KS13_redbMe    | Clade_14  |
| >phormidolide_EKU96424_PhorK_2_KS2_exometh    | Clade_14  |
| >nosperin_NspA_3_KS3_exometh                  | Clade_14  |
| >onnamide_OnnB_3_KS3_exometh                  | Clade_14  |
| >etnangien_EtnD_2_KS2_eDBbMe                  | Clade_14  |
| >myxovirescin_TaO_1_KS8_redbethyl             | Clade_14  |
| >kalimantacin_batumin_Bat3_3_KS10_exometh     | Clade_14  |
| >paenimacrolidin_KS5_bMe                      | Clade_14  |
| >diaphorin_DipP_3_KS3_exometh                 | Clade_14  |
| >pederin_PedI_3_KS3_exometh                   | Clade_14  |
| >9methylstreptimidone_Smdl_4_KS4_eDB          | Clade_140 |
| >cycloheximide_ChxE_4_KS4_b_D_OH              | Clade_140 |
| >dorrigocin_migrastatin_MgsF_1_KS4_b_D_OH_eDB | Clade_140 |
| >nosperin_NspA_2_KS2_a_L_Meb_D_OH             | Clade_140 |
| >diaphorin_DipP_2_KS2_a_L_Meb_D_OH            | Clade_140 |
| >onnamide_OnnB_2_KS2_a_L_Me_D_OH              | Clade_140 |
| >pederin_PedI_2_KS2_a_L_Meb_D_OH              | Clade_140 |
| >etnangien_EtnD_3_KS3_b_D_OH                  | Clade_140 |
| >etnangien_EtnI_2_KS18_a_L_Meb_D_OH           | Clade_140 |
| >etnangien_EtnI_3_KS19_a_L_Meb_D_OH           | Clade_140 |
| >kalimantacin_batumin_Bat2_3_KS4_bOH          | Clade_140 |
| >etnangien_EtnF_2_KS9_b_D_OH                  | Clade_140 |
| >elansolid_Csan_ElaQ_1_KS11_a_L_Meb_D_OH      | Clade_140 |
| >elansolid_Cpin_ElsP_1_KS11_a_L_Meb_D_OH      | Clade_140 |
| >myxovirescin_TaI_2_KS2_b_L_OH                | Clade_140 |
| >difficidin_DifG_1_KS4_OH                     | Clade_140 |
| >luminaolid_LumD_3_KS13_b_D_OH                | Clade_140 |
| >tolytoxin_TtoE_7_KS13_b_D_OH                 | Clade_140 |
| >misakinolide_MisE_3_KS13_b_D_OH              | Clade_140 |
| >luminaolid_LumE_3_KS17_b_D_OH                | Clade_140 |
| >tolytoxin_TtoF_3_KS17_b_D_OH                 | Clade_140 |
| >misakinolide_MisF_3_KS17_b_D_OH              | Clade_140 |
| >bryostatin_BryD_2_KS13_0b_D_OH               | Clade_140 |
| >onnamide_OnnI_3_KS6_b_D_OH                   | Clade_140 |
| >bryostatin_BryA_KS3_3_b_D_OH                 | Clade_140 |
| >phormidolide_EKU96423_PhorL_1_KS4_aMeb_D_OH  | Clade_140 |
| >diaphorin_DipT_3_KS6_b_D_OH                  | Clade_140 |
| >pederin_PedF_3_KS6_b_D_OH                    | Clade_140 |
| >thailandamide_TaiL_3_KS11_b_D_OH             | Clade_140 |
| >psymberin_PsyD_3_KS5_b_D_OH                  | Clade_140 |
| >basiliskamides_P615_BasE_2_KS3_a_D_Meb_D_OH  | Clade_140 |
| >elansolid_Csan_ElaJ_2_KS2_eDB                | Clade_141 |
| >elansolid_Cpin_ElsI_2_KS2_eDB                | Clade_141 |
| >elansolid_Csan_ElaQ_3_KS13_aMeDB             | Clade_141 |
| >elansolid_Cpin_ElsP_3_KS13_aMeDB             | Clade_141 |
| >sorangicin_SorA_4_KS4_aMeDB                  | Clade_141 |
| >sorangicin_SorC_1_KS12_eDB                   | Clade_141 |
| >misakinolide_MisF_4_KS18_aMeDB               | Clade_141 |

|                                                    |           |
|----------------------------------------------------|-----------|
| >tolytoxin_TtoF_4_KS18_aMeeDB                      | Clade_141 |
| >difficidin_DifF_2_KS2_aMeeDB                      | Clade_141 |
| >rhizoxins_RhiB_3_KS4_aMeeDB                       | Clade_141 |
| >chivosazole_ChiF_1_KS15_aMeeDB                    | Clade_141 |
| >oxazolomycin_OzmH_1_KS5_aMezDB                    | Clade_141 |
| >corallopyronin_CorL_4_KS13_aMeDB                  | Clade_141 |
| >myxopyronin_MxnK_5_KS11_aMeDB                     | Clade_141 |
| >calyculin_CalG_2_KS22_aMeDB                       | Clade_141 |
| >albicidin_Albi_2_KS2_aMeeDB                       | Clade_141 |
| >FR901464_Fr9F_4_KS7_aMeeDB                        | Clade_141 |
| >thailanstatin_TstDEF_4_KS7_aMeeDB                 | Clade_141 |
| >malleilactone_burkholderic_acid_BurF_2_KS2_aMeeDB | Clade_141 |
| >thailandamide_TaiM_3_KS15_aMeeDB                  | Clade_141 |
| >bacillaene_Bamy_BaeM_2_KS9_zDBaMe                 | Clade_141 |
| >bacillaene_Bsub_PksM_2_KS9_zDBaMe                 | Clade_141 |
| >difficidin_DifI_1_KS7_aMezDB                      | Clade_141 |
| >elansolid_Csan_ElaR_1_KS14_0eDB                   | Clade_142 |
| >elansolid_ElsQ_1_KS14_0eDB                        | Clade_142 |
| >luminaolid_LumE_4_KS18_0b_D_OH                    | Clade_142 |
| >tolytoxin_TtoF_5_KS19_0eDB                        | Clade_142 |
| >misakinolide_MisF_5_KS19_0eDB                     | Clade_142 |
| >pederin_PedH_4_KS13_0eDB                          | Clade_142 |
| >rhizoxins_RhiF_2_KS16_0eDB                        | Clade_142 |
| >sorangicin_SorB_1_KS8_0zDB                        | Clade_142 |
| >enacyloxin_Bamb_5919_2_KS11_0eDB                  | Clade_142 |
| >bacillaene_Bamy_BaeR_1_KS13_0aMeDB                | Clade_142 |
| >bacillaene_Bsub_PksR_1_KS14_0aMeDB                | Clade_142 |
| >onnamide_OnnI_7_KS10_0red                         | Clade_142 |
| >calyculin_CalH_3_KS27_eDB                         | Clade_142 |
| >nosperin_NspC_3_KS6_0biomod_aMeeDB                | Clade_142 |
| >rhizoxins_RhiD_3_KS11_0biomod_aMeeDB              | Clade_142 |
| >chivosazole_ChiF_4_KS18_0zDB                      | Clade_142 |
| >luminaolid_LumA_3_KS3_0biomod_a_D_Meb_D_OH        | Clade_142 |
| >tolytoxin_TtoC_3_KS3_0a_D_Meb_D_OH                | Clade_142 |
| >misakinolide_MisC_3_KS3_0biomod_b_D_OME           | Clade_142 |
| >chivosazole_ChiD_1_KS10_0AAoxz                    | Clade_142 |
| >disorazole_DszC_1_KS9_0AAoxz                      | Clade_142 |
| >rhizopodin_RizD_1_KS11_0AAoxa                     | Clade_142 |
| >calyculin_CalC_1_KS7_KS0oxa                       | Clade_142 |
| >rhizoxins_RhiB_1_KS2_0AAoxa                       | Clade_142 |
| >leinamycin_LnmI_1_KS1_0AAoxz                      | Clade_142 |
| >rhizopodin_RizB_7_KS7_0biomod_b_D_OH              | Clade_142 |
| >rhizopodin_RizD_3_KS13_0biomod_b_D_OH             | Clade_142 |
| >rhizopodin_RizB_3_KS3_0biomod_a_D_Meb_D_OH        | Clade_142 |
| >rhizopodin_RizE_1_KS17_0biomod_b_L_OH             | Clade_142 |
| >tartrolon_TrtrF_2_KS10_0reda_D_Me                 | Clade_142 |
| >griseoviridin_SgvE4_1_KS7_b_D_OH                  | Clade_142 |
| >virginiamycin_VirH_1_KS7_0AAoxz                   | Clade_142 |
| >disorazole_DszC_1_KS2_0AAoxz                      | Clade_142 |
| >corallopyronin_CorJ_2_KS5_0aMe                    | Clade_142 |
| >myxopyronin_MxnJ_2_KS5_0reda_L_Me                 | Clade_142 |
| >chlorotonil_CtoC_4_KS4_aMezshDB                   | Clade_2   |
| >chlorotonil_CtoD_4_aMeshDB                        | Clade_2   |
| >anthracimycin_AtcE_KS7_redaMe                     | Clade_2   |
| >disorazole_DszA_3_KS3_adiMeb_L_OH                 | Clade_2   |
| >corallopyronin_CorL_1_KS10_bMeDB                  | Clade_2   |
| >chivosazole_ChiC_1_KS4_a_D_Meb_D_OH               | Clade_2   |
| >luminaolid_LumC_2_KS8_a_D_Meb_D_OH_b_D_OH         | Clade_2   |
| >tolytoxin_TtoE_2_KS8_a_D_Me_D_OH                  | Clade_2   |

|                                                  |           |
|--------------------------------------------------|-----------|
| >misakinolide_MisD_2_KS8_b_L_OH                  | Clade_2   |
| >9methylstreptimidone_Smdl_KS5_5_a_D_Mebketo     | Clade_21  |
| >cycloheximide_ChxE_5_KS5_a_D_Mebketo            | Clade_21  |
| >FR901464_Fr9F_2_KS5_reda_L_Me                   | Clade_21  |
| >thailanstatin_TstDEF_2_KS5_reda_L_Me            | Clade_21  |
| >calyculin_CalB_3_KS5_0reda_L_Me                 | Clade_21  |
| >dorrigocin_migrastatin_MgsF_2_KS5_a_D_MebketodH | Clade_21  |
| >dorrigocin_migrastatin_MgsF_5_KS8_b_L_OH        | Clade_21  |
| >bongkreki acid_BonA_3_KS3_aMeDB                 | Clade_23  |
| >bongkreki acid_BonD_1_KS10_a_L_Me               | Clade_23  |
| >chlorotonil_CtoD_3_KS7_redaMe                   | Clade_23  |
| >bacillaene_Bamy_BaeJ_2_KS2_red                  | Clade_25  |
| >bacillaene_Bsub_PksJ_2_KS2_red                  | Clade_25  |
| >bacillaene_Bamy_BaeN_2_KS11_shDB                | Clade_25  |
| >bacillaene_Bsub_PksN_2_KS12_shDB                | Clade_25  |
| >bacillaene_Bamy_BaeN_3_KS12_shDB                | Clade_25  |
| >bacillaene_Bsub_PksN_3_KS13_shDB                | Clade_25  |
| >difficidin_DifI_3_KS9_red                       | Clade_25  |
| >paenimacrolidin_KS2_DB                          | Clade_25  |
| >kalimantacin_batumin_Bat3_2_KS9_eDB             | Clade_25  |
| >diaphorin_DipO_2_KS11_DB                        | Clade_25  |
| >pederin_PedH_2_KS11_red                         | Clade_25  |
| >oocydin_Smar_OocR_2_KS12_shDB                   | Clade_25  |
| >oocydin_Ddad_OocR_2_KS12_shDB                   | Clade_25  |
| >rhizoxins_RhiD_2_KS10_shD                       | Clade_25  |
| >myxovirescin_TaO_4_KS11_red                     | Clade_25  |
| >myxovirescin_TaO_2_KS9_red                      | Clade_25  |
| >calyculin_CalE_3_KS12_a_D_Meb_L_OH              | Clade_25  |
| >dorrigocin_migrastatin_MgsF_6_KS9_eDB           | Clade_25  |
| >dorrigocin_migrastatin_MgsG_1_KS10_red          | Clade_25  |
| >difficidin_DifF_3_KS3_red                       | Clade_25  |
| >oocydin_Smar_OocN_5_KS9_red                     | Clade_25  |
| >oocydin_Ddad_OocN_5_KS9_red                     | Clade_25  |
| >sorangicin_SorA_2_KS2_red                       | Clade_25  |
| >sorangicin_SorB_4_KS11_red                      | Clade_25  |
| >myxovirescin_TaO_3_KS10_bketo                   | Clade_25  |
| >phormidolide_EKU96424_PhorK_3_KS3_b_D_OH        | Clade_25  |
| >myxovirescin_Ta1_5_KS5_red                      | Clade_25  |
| >calyculin_CalA_2_KS2_AAser                      | Clade_25  |
| >bongkreki acid_BonB_2_KS8_red                   | Clade_25  |
| >bryostatin_BryC_2_KS9_pyran                     | Clade_26  |
| >diaphorin_DipT_5_KS8_pyran                      | Clade_26  |
| >pederin_PedF_5_KS8_pyran                        | Clade_26  |
| >luminaolid_LumE_2_KS16_pyran                    | Clade_26  |
| >tolytoxin_TtoF_2_KS16_pyran                     | Clade_26  |
| >misakinolide_MisF_2_KS16_pyran                  | Clade_26  |
| >onnamide_OnnI_5_KS8_pyran                       | Clade_26  |
| >psymberin_PsyD_5_KS7_pyran                      | Clade_26  |
| >oocydin_Smar_OocN_4_KS8_furan                   | Clade_26  |
| >oocydin_Ddad_OocN_4_KS8_furan                   | Clade_26  |
| >phormidolide_EKU96420_PhorO_4_KS12_furan        | Clade_26  |
| >sorangicin_SorH_1_KS20_pyran                    | Clade_26  |
| >sorangicin_SorE_2_KS16_pyran                    | Clade_26  |
| >sorangicin_SorB_2_KS9_pyran                     | Clade_26s |
| >corallopyronin_CorK_1_KS7_acetyl                | Clade_27  |
| >myxopyronin_MxnK_1_KS7_starter                  | Clade_27  |
| >disorazole_DszA_1_KS1_acetylStarter             | Clade_27  |
| >macrolactin_MlnB_1_KS1_acetylStarter            | Clade_27  |
| >anthracimycin_AtcD_1_KS1_acetylStarter          | Clade_27  |

|                                                            |          |
|------------------------------------------------------------|----------|
| >chlorotonil_CtoC_1_KS1_acetylStarter                      | Clade_27 |
| >misakinolide_MisC_1_KS1_acetylStarter                     | Clade_27 |
| >calyculin_CalA_KS1_KSOAAser                               | Clade_28 |
| >bacillaene_Bamy_BaeJ_1_KS1_Agly                           | Clade_28 |
| >bacillaene_Bsub_PksJ_1_KS1_AAgly                          | Clade_28 |
| >bacillaene_Bamy_BaeN_1_KS10_AAala                         | Clade_28 |
| >bacillaene_Bsub_PksN_1_KS11_AAala                         | Clade_28 |
| >diaphorin_DipT_2_KS5_AAgly                                | Clade_28 |
| >pederin_PedF_2_KS5_AAgly                                  | Clade_28 |
| >onnamide_OnnI_2_KS5_AAgly                                 | Clade_28 |
| >psymberin_PsyD_2_KS4_AAgly                                | Clade_28 |
| >calyculin_CalH_2_KS26_AAala                               | Clade_28 |
| >nosperin_NspC_2_KS5_AAgly                                 | Clade_28 |
| >calyculin_CalB_2_KS4_AAgly                                | Clade_28 |
| >kalimantacin_batumin_Bat2_1_KS2_AAGly                     | Clade_28 |
| >myxovirescin_TaI_1_KS1_AAgly                              | Clade_28 |
| >FR901464_Fr9D_1_KS4_AAthr                                 | Clade_28 |
| >thailandstatin_TstDEF_1_KS4_AAthr                         | Clade_28 |
| >thailandamide_TaiE_1_KS5_AAala                            | Clade_28 |
| >griseoviridin_SgvE2_1_KS3_AAgly                           | Clade_28 |
| >virginiamycin_VirA_3_KS3_AAgly                            | Clade_28 |
| >oxazolomycin_OzmN_1_KS2_AAoxa.                            | Clade_28 |
| >oxazolomycin_OzmQ_1_KS1_AAgly                             | Clade_28 |
| >malleilactone_burkholderic_acid_BurA_1_KS1_unusualStarter | Clade_28 |
| >basiliskamides_P615_BasE_3_KS3_bOH                        | Clade_30 |
| >elansolid_Csan_ElaO_2_KS7_bimod_b_D_OH                    | Clade_30 |
| >elansolid_Cpin_ElsN_2_KS7_bimod_b_D_OH                    | Clade_30 |
| >difficidin_DifI_4_KS10_bimod_bOH                          | Clade_30 |
| >etnangien_EtnG_4_KS14_0bOH                                | Clade_30 |
| >chivosazole_ChiC_2_KS5_bimod_bOH                          | Clade_30 |
| >chivosazole_ChiD_3_KS12_bimod_bOH                         | Clade_30 |
| >chivosazole_ChiF_2_KS16_bimod_bOH                         | Clade_30 |
| >macrolactin_MlnE_2_KS8_bimod_bOH                          | Clade_30 |
| >macrolactin_MlnG_1_KS11_bimod_bOH                         | Clade_30 |
| >kirromycin_KirAIV_5_KS11_b_D_OH                           | Clade_30 |
| >leinamycin_Lnml_3_KS3_zDB                                 | Clade_30 |
| >kirromycin_KirAI_2_KS2_zcrotonyl                          | Clade_30 |
| >tartrolon_Trtd_KS3_3_bimod_bOH                            | Clade_30 |
| >bacillaene_Bamy_BaeJ_3_KS3_0Hbimod_bOH                    | Clade_31 |
| >bacillaene_Bsub_PksJ_3_KS3_0Hbimod_OH                     | Clade_31 |
| >bacillaene_Bamy_BaeL_4_KS7_0Hbimod_bOH                    | Clade_31 |
| >bacillaene_Bsub_PksL_4_KS7_0bimod_bOH                     | Clade_31 |
| >difficidin_DifG_2_KS5_0Hbimod_bOH                         | Clade_31 |
| >luminaolid_LumD_4_KS14_0bimod_b_D_OH                      | Clade_31 |
| >tolytoxin_TtoE_8_KS14_0bimod_b_D_OH                       | Clade_31 |
| >misakinolide_MisE_4_KS14_0b_L_OH                          | Clade_31 |
| >bongkrekiac_acid_BonA_6_KS6_0bimod_bOH                    | Clade_31 |
| >kalimantacin_batuminBat2_6_KS7_0bimod_bOH                 | Clade_31 |
| >sorangicin_SorA_7_KS7_0bimod_bOH                          | Clade_31 |
| >sorangicin_SorH_3_KS22_0bimod_bOH                         | Clade_31 |
| >oxazolomycin_OzmH_4_KS8_0eDB                              | Clade_31 |
| >thailandamide_TaiK_2_KS8_0bOH                             | Clade_31 |
| >difficidin_DifJ_2_KS12_0bimod_bOH                         | Clade_31 |
| >bongkrekiac_acid_BonA_KS1_1_GNATstarter                   | Clade_32 |
| >enacyloxin_Bamb_5921_2_KS7_b_D_OH                         | Clade_32 |
| >enacyloxin_Bamb_5924_3_KS3_b_D_OH                         | Clade_32 |
| >enacyloxin_Bamb_5924_2_KS2_eDB                            | Clade_32 |
| >enacyloxin_Bamb_5920_2_KS9_aMeDB                          | Clade_32 |
| >psymberin_PsyD_9_KS11_bketo                               | Clade_32 |

|                                                           |          |
|-----------------------------------------------------------|----------|
| >SIA7248_Sial_1_KS13_2biMod_OH                            | Clade_32 |
| >2qo3_chainA_EryKS3_OUTGROUP                              | Clade_32 |
| >2hg4_chainA_EryKS5_OUTGROUP                              | Clade_32 |
| >enacyloxin_Bamb_5922_1_KS5_b_D_OH.                       | Clade_32 |
| >enacyloxin_Bamb_5920_1_KS8_eDB                           | Clade_32 |
| >enacyloxin_Bamb_5919_1_KS10_bketo                        | Clade_32 |
| >enacyloxin_Bamb_5923_1_KS4_b_L_OH                        | Clade_32 |
| >thiomarinol_TmpD_1_KS1_acetylStarter                     | Clade_33 |
| >mupirocin_MmpD_1_KS1_acetylStarter                       | Clade_33 |
| >thailandamide_TaiD_1_KS1_aromaticStarter                 | Clade_33 |
| >corallopyronin_CorI_1_KS1_unusualStarter_methoxycarbonyl | Clade_34 |
| >myxopyronin_MxnI_1_KS1_unusualstarter                    | Clade_34 |
| >diaphorin_DipO_1_KS10_rearrangement                      | Clade_35 |
| >pederin_PedH_1_KS10_rearrangement                        | Clade_35 |
| >oocydin_Smar_OocL_1_KS3_rearrangement                    | Clade_35 |
| >oocydin_Ddad_OocL_1_KS3_rearrangement                    | Clade_35 |
| >chivosazole_ChiD_1_KS10_0AAoxz                           | Clade_36 |
| >disorazole_DszC_1_KS9_0AAoxz                             | Clade_36 |
| >rhizopodin_RizD_1_KS11_0AAoxa                            | Clade_36 |
| >calyculin_CalC_1_KS7_KS0oxa                              | Clade_36 |
| >rhizoxins_RhiB_1_KS2_0AAoxa                              | Clade_36 |
| >leinamycin_LnmI_1_KS1_0AAoxa                             | Clade_36 |
| >FR901464_Fr9I_2_KS12_0pyran                              | Clade_38 |
| >thailanstatin_TstI_2_KS12_0pyran                         | Clade_38 |
| >corallopyronin_CorI_2_KS2_AAgly                          | Clade_39 |
| >myxopyronin_MxnI_2_KS2_AAgly                             | Clade_39 |
| >lankacidin_LkcA_1_KS1_AAgly                              | Clade_39 |
| >chivosazole_ChiC_5_KS8_b_L_OH                            | Clade_40 |
| >anthracimycin_AtcF_3_KS10_bketo                          | Clade_40 |
| >chlorotonil_CtoE_2_KS10_bketo                            | Clade_40 |
| >kirromycin_KirAIV_4_KS10_b_L_OH                          | Clade_40 |
| >macrolactin_MlnD_2_KS6_b_D_OH                            | Clade_40 |
| >corallopyronin_CorJ_1_KS4_shDB                           | Clade_42 |
| >myxopyronin_MxnJ_1_KS4_shDB                              | Clade_42 |
| >luminaolid_LumA_2_KS2_a_D_MeshDB                         | Clade_43 |
| >tolytoxin_TtoC_2_KS2_a_D_MeshDB                          | Clade_43 |
| >bacillaene_Bamy_BaeR_2_KS14_0shDBMe                      | Clade_44 |
| >bacillaene_Bsub_PksR_2_KS15_0shDBaMe                     | Clade_44 |
| >calyculin_CalH_1_KS25_bMeDB                              | Clade_44 |
| >calyculin_CalB_4_KS6_0reda_L_Me                          | Clade_44 |
| >thailandamide_TaiD_4_KS4_0reda_D_Me                      | Clade_44 |
| >oocydin_Smar_OocN_6_KS10_0bketo                          | Clade_45 |
| >oocydin_Ddad_OocN_6_KS10_0bketo                          | Clade_45 |
| >diaphorin_DipT_1_KS4_0acetal                             | Clade_46 |
| >pederin_PedF_1_KS4_0acetal                               | Clade_46 |
| >nosperin_NspC_1_KS4_0acetal                              | Clade_46 |
| >onnamide_OnnI_1_KS4_0acetal                              | Clade_46 |
| >nosperin_NspC_4_KS7_aMeshDB                              | Clade_49 |
| >rhizoxins_RhiE_1_KS1_aMeshDB                             | Clade_49 |
| >onnamide_OnnJ_1_KS11_bOH                                 | Clade_49 |
| >calyculin_CalI_1_KS24_shDB                               | Clade_49 |
| >chivosazole_ChiD_2_KS11_AAoxa                            | Clade_5  |
| >rhizopodin_RizD_2_KS12_AAoxa                             | Clade_5  |
| >rhizoxins_RhiB_2_KS3_AAoxa                               | Clade_5  |
| >calyculin_CalC_2_KS8_AAoxa                               | Clade_5  |
| >bacillaene_Bamy_BaeL_1_KS4_zDB                           | Clade_51 |
| >bacillaene_Bsub_PksL_1_KS4_zDB                           | Clade_51 |
| >bacillaene_Bamy_BaeM_1_KS8_zDB                           | Clade_51 |
| >bacillaene_Bsub_PksM_1_KS8_zDB                           | Clade_51 |



|                                          |          |
|------------------------------------------|----------|
| >difficidin_DifH_1_KS6_zDB               | Clade_51 |
| >chivosazole_ChiF_1_KS15_aMeeDB          | Clade_52 |
| >oxazolomycin_OzmH_1_KS5_aMezDB          | Clade_52 |
| >corallopyronin_CorL_4_KS13_aMeDB        | Clade_52 |
| >myxopyronin_MxnK_5_KS11_aMeDB           | Clade_52 |
| >macrolactin_MlnB_2_KS2_b_D_OH           | Clade_53 |
| >chlorotonil_CtoC_2_KS2_bOH              | Clade_53 |
| >anthracimycin_AtcD_2_KS2_bOH            | Clade_53 |
| >griseoviridin_SgvE1_2_KS2_b_D_OH        | Clade_53 |
| >virginiamycin_VirA_2_KS2_a_L_Meb_D_OH   | Clade_53 |
| >griseoviridin_SgvE3_2_KS6_b_L_OH        | Clade_53 |
| >virginiamycin_VirG_1_KS6_b_D_OH         | Clade_53 |
| >misakinolide_MisF_4_KS18_aMeeDB         | Clade_55 |
| >tolytoxin_TtoF_4_KS18_aMeeDB            | Clade_55 |
| >difficidin_DifF_2_KS2_aMeeDB            | Clade_55 |
| >rhizoxins_RhiB_3_KS4_aMeeDB             | Clade_55 |
| >oocydin_Smar_OocS_2_KS14_aMezDB         | Clade_56 |
| >oocydin_Ddad_OocS_2_KS14_aMezDB         | Clade_56 |
| >elansolid_Csan_ElaJ_2_KS2_eDB           | Clade_57 |
| >elansolid_Cpin_ElsI_2_KS2_eDB           | Clade_57 |
| >elansolid_Csan_ElaQ_3_KS13_aMeDB        | Clade_57 |
| >elansolid_Cpin_ElsP_3_KS13_aMeDB        | Clade_57 |
| >luminaolid_LumE_1_KS15_zDB              | Clade_60 |
| >tolytoxin_TtoF_1_KS15_zDB               | Clade_60 |
| >misakinolide_MisF_1_KS15_zDB            | Clade_60 |
| >nosperin_NspA_2_KS2_a_L_Meb_D_OH        | Clade_61 |
| >diaphorin_DipP_2_KS2_a_L_Meb_D_OH       | Clade_61 |
| >onnamide_OnnB_2_KS2_a_L_Me_D_OH         | Clade_61 |
| >pederin_PedI_2_KS2_a_L_Meb_D_OH         | Clade_61 |
| >etnangien_EtnD_3_KS3_b_D_OH             | Clade_62 |
| >etnangien_EtnI_2_KS18_a_L_Meb_D_OH      | Clade_62 |
| >etnangien_EtnI_3_KS19_a_L_Meb_D_OH      | Clade_62 |
| >kalimantacin_batumin_Bat2_3_KS4_bOH     | Clade_62 |
| >etnangien_EtnF_2_KS9_b_D_OH             | Clade_62 |
| >elansolid_Csan_ElaQ_1_KS11_a_L_Meb_D_OH | Clade_62 |
| >elansolid_Cpin_ElsP_1_KS11_a_L_Meb_D_OH | Clade_62 |
| >myxovirescin_Ta1_2_KS2_b_L_OH           | Clade_62 |
| >difficidin_DifG_1_KS4_OH                | Clade_62 |
| >9methylstreptimidone_Smdl_2_KS2_ozDB    | Clade_64 |
| >cycloheximide_ChxE_2_KS2_ozDB           | Clade_64 |
| >dorrigocin_migrastatin_MgsE_2_KS2_ozDB  | Clade_64 |
| >rhizoxins_RhiE_3_KS14_0eDB              | Clade_64 |
| >bacillaene_Bamy_BaeL_1_KS4_zD           | Clade_65 |
| >bacillaene_Bsub_PksL_1_KS4_zD           | Clade_65 |
| >bacillaene_Bamy_BaeM_1_KS8_zDB          | Clade_65 |
| >bacillaene_Bsub_PksM_1_KS8_zDB          | Clade_65 |
| >difficidin_DifH_1_KS6_zDB               | Clade_65 |
| >luminaolid_LumE_1_KS15_zDB              | Clade_65 |
| >tolytoxin_TtoF_1_KS15_zDB               | Clade_65 |
| >misakinolide_MisF_1_KS15_zDB            | Clade_65 |
| >oocydin_Smar_OocS_2_KS14_aMezDB         | Clade_65 |
| >oocydin_Ddad_OocS_2_KS14_aMezDB         | Clade_65 |
| >difficidin_DifJ_1_KS11_zDB_zDB          | Clade_65 |
| >elansolid_Csan_ElaP_1_KS8_eDB           | Clade_65 |
| >elansolid_Cpin_ElsO_1_KS8_eDB           | Clade_65 |
| >oxazolomycin_OzmN_3_KS4_zDB             | Clade_65 |
| >kalimantacin_batumin_Bat3_1_KS8_eDB     | Clade_65 |
| >oxazolomycin_OzmH_5_KS9_eDB             | Clade_65 |
| >thailandamide_TaiL_1_KS9_eDB            | Clade_65 |

|                                                   |          |
|---------------------------------------------------|----------|
| >leinamycin_LnmJ_1_KS4_eDB                        | Clade_65 |
| >SIA7248_SiaH_KS11_eDB                            | Clade_65 |
| >bongkrekiac_acid_BonA_4_KS4_b_L_OH               | Clade_66 |
| >bryostatin_BryA_2_KS2_b_L_OH                     | Clade_66 |
| >bryostatin_BryD_1_KS12_b_L_OH                    | Clade_66 |
| >bryostatin_BryB_4_KS7_b_L_OH                     | Clade_66 |
| >phormidolide_EKU96420_PhorO_3_KS11_b_L_OH        | Clade_66 |
| >rhizoxins_RhiE_2_KS13_b_L_OH                     | Clade_66 |
| >diaphorin_DipT_6_KS9_b_L_OH                      | Clade_66 |
| >pederin_PedF_6_KS9_b_L_OH                        | Clade_66 |
| >luminaolid_LumC_3_KS9_b_L_OH                     | Clade_66 |
| >tolytoxin_TtoE_3_KS9_b_L_OH                      | Clade_66 |
| >misakinolide_MisD_3_KS9_b_L_OH                   | Clade_66 |
| >onnamide_OnnI_6_KS9_b_L_OH                       | Clade_66 |
| >kalimantacin_batumin_Bat2_2_KS3_bOH              | Clade_66 |
| >sorangicin_SorA_5_KS5_a_L_OHb_L_OH               | Clade_66 |
| >sorangicin_SorD_2_KS14_b_L_OH                    | Clade_66 |
| >difficidin_DifI_2_KS8_bOH                        | Clade_66 |
| >oocydin_Smar_OocN_3_KS7_b_L_OH                   | Clade_66 |
| >oocydin_Ddad_OocN_3_KS7_b_L_OH                   | Clade_66 |
| >psymberin_PsyD_7_KS9_b_L_OH                      | Clade_66 |
| >oocydin_Smar_OocJ_1_KS1_unusualStarter           | Clade_67 |
| >oocydin_Ddad_OocJ_1_KS1_unusualStarter           | Clade_67 |
| >phormidolide_EKU96424_PhorK_1_KS1_unusualStarter | Clade_67 |
| >sorangicin_SorD_1_KS13_a_L_OHb_L_OH              | Clade_68 |
| >sorangicin_SorG_1_KS18_a_L_Mb_L_OH               | Clade_68 |
| >chivosazole_ChiE_2_KS14_a_L_Meb_L_OH             | Clade_68 |
| >phormidolide_EKU96423_PhorL_2_KS5_b_D_OH         | Clade_7  |
| >phormidolide_EKU96423_PhorL_4_KS7_b_D_OH         | Clade_7  |
| >rhizoxins_RhiC_3_KS8_b_D_OH                      | Clade_7  |
| >oocydin_Smar_OocN_2_KS6_a_D_OHb_L_OH             | Clade_70 |
| >oocydin_Ddad_OocN_2_KS6_a_D_OHb_L_OH             | Clade_70 |
| >phormidolide_EKU96420_PhorO_2_KS10_0aOHaMeb_D_OH | Clade_70 |
| >bacillaene_Bamy_BaeL_3_KS6_bMeeDB                | Clade_73 |
| >bacillaene_Bsub_PksL_3_KS6_bMeeDB                | Clade_73 |
| >elansolid_Csan_ElaO_1_KS6_bMeeDB                 | Clade_73 |
| >elansolid_Cpin_ElsN_1_KS6_bMeeDB                 | Clade_73 |
| >oocydin_Smar_OocL_2_KS4_eDBbMe                   | Clade_73 |
| >oocydin_Ddad_OocL_2_KS4_eDBbMe                   | Clade_73 |
| >phormidolide_EKU96423PhorL_5_KS8_eDBbMe          | Clade_73 |
| >bongkrekiac_acid_BonA_2_KS2_bMeeDB               | Clade_73 |
| >sorangicin_SorA_6_KS6_zDB                        | Clade_73 |
| >etnangien_EtnE_3_KS3_eDBbMe                      | Clade_73 |
| >calyculin_CalG_3_KS23_bMeeDB                     | Clade_73 |
| >thailandamide_TaiM_1_KS13_bMeeDB                 | Clade_73 |
| >myxovirescin_Ta1_6_KS6_eDBbMe                    | Clade_73 |
| >SIA7248_SiaG_1_KS8_bMeeDB                        | Clade_73 |
| >thailandamide_TaiK_1_KS7_bMeeDB                  | Clade_73 |
| >basiliskamides_P615_BasF_1_KS1_GNATstarter       | Clade_74 |
| >basiliskamides_P615_BasE_1_KS2_a_L_Me_red        | Clade_74 |
| >elansolid_Csan_ElaK_2_KS4_aMe                    | Clade_74 |
| >elansolid_Cpin_ElsJ_2_KS4_aMe                    | Clade_74 |
| >elansolid_Csan_ElaK_1_KS3_adiMeb_D_OH            | Clade_74 |
| >elansolid_Cpin_ElsJ_1_KS3_adiMeb_D_OH            | Clade_74 |
| >difficidin_DifI_1_KS14_redaMe                    | Clade_74 |
| >calyculin_CalE_6_KS16_adiMbketo                  | Clade_74 |
| >sorangicin_SorA_3_KS3_reda_D_Me                  | Clade_74 |
| >myxovirescin_TaP_1_KS1_reda_D_Me                 | Clade_74 |
| >paenimacrolidin_KS3_bMe                          | Clade_74 |

|                                                         |          |
|---------------------------------------------------------|----------|
| >paenimacrolidin_KS4_bMe                                | Clade_74 |
| >bryostatin_BryB_2_KS5_adiMebketo                       | Clade_74 |
| >bryostatin_BryC_3_KS10_adiMebketo                      | Clade_74 |
| >thiomarinol_TmpD_4_KS4_a_D_OH                          | Clade_74 |
| >sorangicin_SorE_1_KS15_a_D_Mb_L_OH                     | Clade_74 |
| >etnangien_EtnF_1_KS8_a_D_Meb_D_OH                      | Clade_74 |
| >mupirocin_MmpD_4_KS4_a_D_Me                            | Clade_74 |
| >mupirocin_MmpD_2_KS2_a_L_Meb_L_OH                      | Clade_74 |
| >dorriginicin_migrastatin_MgsF_4_KS7_a_D_Meb_L_OH       | Clade_74 |
| >bacillaene_Bsub_PksM_3_KS10_bOH                        | Clade_75 |
| >oocydin_Smar_OocS_3_KS15_0b_L_OH                       | Clade_75 |
| >oocydin_Ddad_OocS_3_KS15_0b_L_OH                       | Clade_75 |
| >elansolid_Csan_ElaP_2_KS9_0bimod_bOH                   | Clade_75 |
| >elansolid_Cpin_ElsO_2_KS9_0bimod_bOH                   | Clade_75 |
| >etnangien_EtnF_3_KS10_b_L_OH                           | Clade_75 |
| >etnangien_EtnG_2_KS12_0b_L_OH                          | Clade_75 |
| >etnangien_EtnI_4_KS20_0b_L_OH                          | Clade_75 |
| >elansolid_Csan_ElaR_1_KS14_0eDB                        | Clade_76 |
| >elansolid_ElsQ_1_KS14_0eDB                             | Clade_76 |
| >luminaolid_LumE_4_KS18_0b_D_OH                         | Clade_76 |
| >tolytoxin_TtoF_5_KS19_0eDB                             | Clade_76 |
| >misakinolide_MisF_5_KS19_0eDB                          | Clade_76 |
| >pederin_PedH_4_KS13_0eDB                               | Clade_76 |
| >rhizoxins_RhiF_2_KS16_0eDB                             | Clade_76 |
| >sorangicin_SorB_1_KS8_0zDB                             | Clade_76 |
| >enacyloxin_Bamb_5919_2_KS11_0eDB                       | Clade_76 |
| >bongkrekiic_acid_BonD_3_KS12_0vinylbranch              | Clade_76 |
| >sorangicin_SorI_2_KS24_0zDB                            | Clade_76 |
| >oocydin_Smar_OocR_1_KS11_0bimod_bOH                    | Clade_78 |
| >oocydin_Ddad_OocR_1_KS11_0bimod_bOH                    | Clade_78 |
| >tartrolon_TrtE_2_KS5_0red                              | Clade_78 |
| >griseoviridin_SgvE1_1_KS1_acetylStarter                | Clade_79 |
| >virginiamycin_VirA_1_KS1_unusualstarter                | Clade_79 |
| >FR901464_Fr9I_1_KS11_0b_D_OH                           | Clade_79 |
| >thailanstatin_TstI_1_KS11_0b_D_OH                      | Clade_79 |
| >lankacidin_LkcG_1_KS5_aMebketo                         | Clade_79 |
| >kirromycin_KirAI_1_KS1_AcStarter                       | Clade_79 |
| >9methylstreptimidone_Smdl_1_KS1_unusualstarter_AMT     | Clade_8  |
| >cycloheximide_ChxE_1_KS1_unusualStarter_AMT            | Clade_8  |
| >dorriginicin_migrastatin_MgsE_1_KS1_unusualStarter_AMT | Clade_8  |
| >sorangicin_SorA_1_KS1_unusualStarter                   | Clade_8  |
| >etnangien_EtnD_1_KS1_unusualStarters_Succ              | Clade_8  |
| >FR901464_Fr9C_2_KS2_0bOH                               | Clade_80 |
| >thailanstatin_TstC_2_KS2_0bOH                          | Clade_80 |
| >bryostatin_BryC_4_KS11_0b_D_OH                         | Clade_81 |
| >nosperin_NspC_5_KS5_aMebOH                             | Clade_81 |
| >luminaolid_LumD_1_KS11_0bimod_b_D_OH                   | Clade_81 |
| >misakinolide_MisE_1_KS11_0b_D_OH                       | Clade_81 |
| >tolytoxin_TtoE_5_KS11_0b_D_OH                          | Clade_81 |
| >calyculin_CaE_5_KS14_0b_L_OH                           | Clade_81 |
| >calyculin_CaF_3_KS18_0b_D_OH                           | Clade_81 |
| >oxazolomycin_OzmJ_2_KS11_0a_L_OMebketo                 | Clade_81 |
| >thailandamide_TaiN_1_KS16_0a_D_Meb_D_OH                | Clade_81 |
| >bacillaene_Bamy_Bael_2_KS5_eDB                         | Clade_82 |
| >bacillaene_Bsub_PksL_2_KS5_eDB                         | Clade_82 |
| >elansolid_Csan_ElaK_3_KS5_eDB                          | Clade_82 |
| >elansolid_Cpin_ElsJ_3_KS5_eDB                          | Clade_82 |
| >elansolid_Csan_ElaP_3_KS10_zDB                         | Clade_82 |
| >elansolid_Cpin_ElsO_3_KS10_zDB                         | Clade_82 |

|                                                   |          |
|---------------------------------------------------|----------|
| >etnangien_EtnD_4_KS4_eDB                         | Clade_82 |
| >kalimantacin_batumin_Bat2_5_KS6_eDB              | Clade_82 |
| >sorangicin_SorB_3_KS10_eDB                       | Clade_82 |
| >sorangicin_SorH_2_KS21_eDB                       | Clade_82 |
| >sorangicin_SorE_3_KS17_eDB                       | Clade_82 |
| >sorangicin_SorI_1_KS23_zDB                       | Clade_82 |
| >etnangien_EtnE_1_KS5_eDB                         | Clade_82 |
| >etnangien_EtnE_2_KS6_eDB                         | Clade_82 |
| >bongkrekiac_acid_BonA_5_KS5_DB                   | Clade_82 |
| >bongkrekiac_acid_BonC_1_KS9_eDB                  | Clade_82 |
| >bongkrekiac_acid_BonB_1_KS7_DB                   | Clade_82 |
| >bongkrekiac_acid_BonD_2_KS11_eDB                 | Clade_82 |
| >bacillaene_Bamy_BaeR_1_KS13_0aMeDB               | Clade_83 |
| >bacillaene_Bsub_PksR_1_KS14_0aMeDB               | Clade_83 |
| >onnamide_OnnI_7_KS10_0red                        | Clade_83 |
| >calyculin_CalH_3_KS27_eDB                        | Clade_83 |
| >nosperin_NspC_3_KS6_0biomod_aMeeDB               | Clade_83 |
| >rhizoxins_RhiD_3_KS11_0biomod_aMeeDB             | Clade_83 |
| >chivosazole_ChiF_4_KS18_0zDB                     | Clade_83 |
| >disorazole_DszC_1_KS2_0AAoxa                     | Clade_84 |
| >corallopyronin_CorJ_2_KS5_0aMe                   | Clade_84 |
| >myxopyronin_MxnJ_2_KS5_0reda_L_Me                | Clade_84 |
| >rhizopodin_RizB_7_KS7_0bimodb_D_OH               | Clade_85 |
| >rhizopodin_RizD_3_KS13_0bimod_b_D_OH             | Clade_85 |
| >rhizopodin_RizB_3_KS3_0bimod_a_D_Meb_D_OH        | Clade_85 |
| >rhizopodin_RizE_1_KS17_0bimod_b_L_OH             | Clade_85 |
| >chivosazole_ChiB_3_KS3_a_L_Meb_L_OH              | Clade_86 |
| >anthracimycin_AtcD_4_KS4_aMezshDB                | Clade_86 |
| >luminaolid_LumB_3_KS6_reda_L_Me                  | Clade_86 |
| >tolytoxin_TtoD_3_KS6_reda_L_Me                   | Clade_86 |
| >misakinolide_MisD_1_KS6_reda_L_Me                | Clade_86 |
| >rhizopodin_RizB_6_KS6_reda_L_Me                  | Clade_86 |
| >rhizopodin_RizC_1_KS9_adiMeb_L_OH                | Clade_86 |
| >FR901464_Fr9C_3_KS3_0eDB                         | Clade_88 |
| >thailanstatin_TstC_3_KS3_0eDB                    | Clade_88 |
| >oocydin_Smar_OocS_4_KS16_0                       | Clade_88 |
| >oocydin_Ddad_OocS_4_KS16_0                       | Clade_88 |
| >phormidolide_EKU96419_PhorP_3_KS15_0eDBbMe       | Clade_88 |
| >luminaolid_LumC_1_KS7_a_L_Meb_L_OMe_a_L_Meb_L_OH | Clade_89 |
| >tolytoxin_TtoE_1_KS7_a_D_Meb_D_OH                | Clade_89 |
| >mupirocin_MmpA_KS2_b_D_OH                        | Clade_89 |
| >thiomarinol_TmpD_2_KS2_a_L_Meb_L_OH              | Clade_89 |
| >albicidin_Albi_1_KS1_aromaticStarter_AL          | Clade_9  |
| >elansolid_Csan_ElaJ_1_KS1_aromaticstarter        | Clade_9  |
| >elansolid_Cpin_ElsI_1_KS1_aromaticstarter        | Clade_9  |
| >chivosazole_ChiE_1_KS13_zDB_eDB                  | Clade_90 |
| >mupirocin_MmpE_1_KS9_cyclization                 | Clade_90 |
| >macrolactin_MlnF_1_KS9_zD_zDB                    | Clade_90 |
| >luminaolid_LumB_2_KS5_bketo                      | Clade_90 |
| >tolytoxin_TtoD_2_KS5_bketo                       | Clade_90 |
| >macrolactin_MlnC_1_KS4_eDB                       | Clade_90 |
| >macrolactin_MlnD_1_KS5_eDB                       | Clade_90 |
| >macrolactin_MlnE_1_KS7_b_D_OH                    | Clade_90 |
| >oocydin_Smar_OocN_1_KS5_0a_D_OHb_L_OH            | Clade_92 |
| >oocydin_Ddad_OocN_1_KS5_0a_D_OHb_L_OH            | Clade_92 |
| >diaphorin_DipT_1_KS4_0hacetal                    | Clade_93 |
| >pederin_PedF_1_KS4_0hacetal                      | Clade_93 |
| >nosperin_NspC_1_KS4_0hacetal                     | Clade_93 |
| >onnamide_OnnI_1_KS4_0hacetales                   | Clade_93 |

|                                               |          |
|-----------------------------------------------|----------|
| >psymberin_PsyD_1_KS3_bimod_0b_L_OH           | Clade_93 |
| >calyculin_CalB_1_KS3_KS0_b_L_OH.             | Clade_93 |
| >calyculin_CalF_1_KS16_0_b_L_OH_a_L_Meb_L_OH  | Clade_93 |
| >mupirocin_MmpA_1_KS5_0b_D_OH                 | Clade_93 |
| >thiomarinol_TmpA_1_KS5_0b_D_OH               | Clade_93 |
| >myxovirescin_Ta1_3_KS3_0b_L_OH               | Clade_93 |
| >oocydin_Smar_OocN_1_KS5_0a_D_OHb_L_OH        | Clade_93 |
| >oocydin_Ddad_OocN_1_KS5_0a_D_OHb_L_OH        | Clade_93 |
| >oocydin_Smar_OocN_1_KS5_0a_D_OHb_L_OH        | Clade_93 |
| >oocydin_Ddad_OocN_1_KS5_0a_D_OHb_L_OH        | Clade_93 |
| >phormidolide_EKU96420_PhorO_1_KS9_aMe_D_OH   | Clade_93 |
| >luminaolid_LumA_3_KS3_0bimod_a_D_Meb_D_OH    | Clade_94 |
| >tolytoxin_TtoC_3_KS3_0a_D_Meb_D_OH           | Clade_94 |
| >misakinolide_MisC_3_KS3_0bimod_b_D_OMe       | Clade_94 |
| >rhizopodin_RizB_7_KS7_0bimodb_D_OH           | Clade_94 |
| >rhizopodin_RizD_3_KS13_0bimod_b_D_OH         | Clade_94 |
| >rhizopodin_RizB_3_KS3_0bimod_a_D_Meb_D_OH    | Clade_94 |
| >rhizopodin_RizE_1_KS17_0bimod_b_L_OH         | Clade_94 |
| >chivosazole_ChiC_6_KS9_0a_D_Meb_D_OH         | Clade_94 |
| >corallopyronin_CorL_2_KS11_red               | Clade_95 |
| >myxopyronin_MxnK_3_KS9_red                   | Clade_95 |
| >macrolactin_MlnB_3_KS3_red                   | Clade_95 |
| >corallopyronin_CorK_3_KS9_red                | Clade_95 |
| >rhizopodin_RizB_2_KS2_eDB                    | Clade_95 |
| >misakinolide_MisC_5_KS5_L_OH_or_D_Py         | Clade_95 |
| >legioliulin_LglD_1_KS1_aromaticStarter       | Clade_95 |
| >legioliulin_LglD_3_KS3_bketo                 | Clade_95 |
| >9methylstreptimidone_Smdl_3_KS3_vinylogous   | Clade_96 |
| >cycloheximide_ChxE_3_KS3_vinylogous          | Clade_96 |
| >dorrigocin_migrastatin_MgsE_3_KS3_vinylogous | Clade_96 |
| >kirromycin_KirAII_2_KS4_diMb_L_OH            | Clade_96 |
| >kirromycin_KirAIV_3_KS9_aMebketo             | Clade_96 |
| >kirromycin_KirAIII_4_KS6_AAgly               | Clade_96 |
| >corallopyronin_CorJ_3_KS6_a_D_Me             | Clade_96 |
| >myxopyronin_MxnJ_3_KS6_reda_L_Me             | Clade_96 |
| >rhizoxins_RhiF_1_KS15_vinylogous             | Clade_96 |
| >SIA7248_SiaF_1_KS4_b_D_OH                    | Clade_97 |
| >SIA7248_SiaF_3_KS6_b_D_OH                    | Clade_97 |
| >SIA7248_SiaF_4_KS7_b_D_OH                    | Clade_97 |
| >SIA7248_SiaE_2_KS3_b_L_OH                    | Clade_97 |
| >SIA7248_SiaE_1_KS2_b_D_OH                    | Clade_97 |
| >bacillaene_Bamy_BaeR_2_KS14_0shDBMe          | Clade_98 |
| >bacillaene_Bsub_PksR_2_KS15_OshDBaMe         | Clade_98 |
| >calyculin_CalH_1_KS25_bMeDB                  | Clade_98 |
| >calyculin_CalB_4_KS6_0reda_L_Me              | Clade_98 |
| >thailandamide_TaiD_4_KS4_0reda_D_Me          | Clade_98 |
| >diaphorin_DipT_1_KS4_0acetal                 | Clade_98 |
| >pederin_PedF_1_KS4_0acetal                   | Clade_98 |
| >nosperin_NspC_1_KS4_0acetal                  | Clade_98 |
| >onnamide_OnnI_1_KS4_0acetale                 | Clade_98 |
| >psymberin_PsyD_1_KS3_bimod_0b_L_OH           | Clade_98 |
| >calyculin_CalB_1_KS3_KS0_b_L_OH              | Clade_98 |
| >calyculin_CalF_1_KS16_0_b_L_OH_a_L_Meb_L_OH  | Clade_98 |
| >mupirocin_MmpA_1_KS5_0b_D_OH                 | Clade_98 |
| >thiomarinol_TmpA_1_KS5_0b_D_OH               | Clade_98 |
| >myxovirescin_Ta1_3_KS3_0b_L_OH               | Clade_98 |
| >oocydin_Smar_OocN_1_KS5_0a_D_OHb_L_OH        | Clade_98 |
| >oocydin_Ddad_OocN_1_KS5_0a_D_OHb_L_OH        | Clade_98 |
| >oocydin_Smar_OocR_1_KS11_0bimod_bOH          | Clade_98 |

|                                             |          |
|---------------------------------------------|----------|
| >oocydin_Ddad_OocR_1_KS11_0bimod_bOH        | Clade_98 |
| >phormidolide_EKU96420_PhorO_1_KS9_aMe_D_OH | Clade_98 |
| >rhizoxins_RhiA_1_KS1_0GNATStarter          | Clade_98 |
| >calyculin_CalE_1_KS10_KS0ox                | Clade_98 |
| >etnangien_EtnG_1_KS11_red                  | Clade_98 |
| >oocydin_Smar_OocN_6_KS10_0bketo            | Clade_98 |
| >oocydin_Ddad_OocN_6_KS10_0bketo            | Clade_98 |
| >tartrolon_Trte_2_KS5_0red                  | Clade_98 |
| >bryostatin_BryB_3_KS6_eDB                  | Clade_99 |
| >bryostatin_BryX_2_KS15_0                   | Clade_99 |
| >onnamide_OnnJ_2_KS12_bimod_eDB             | Clade_99 |
| >calyculin_CalG_4_KS24_eDB                  | Clade_99 |
| >calyculin_CalC_3_KS9_eDB                   | Clade_99 |
| >rhizoxins_RhiB_4_KS5_eDB                   | Clade_99 |
| >phormidolide_EKU96419_PhorP_2_KS14_b_D_OH  | Clade_99 |
| >pederin_PedH_3_KS12_bimod_bOH              | Clade_99 |
| >difficidin_DifK_1_KS13_eDB                 | Clade_99 |
| >FR901464_Fr9G_1_KS8_eDB                    | Clade_99 |
| >thailanstatin_TstGH_1_KS8_eDB              | Clade_99 |
| >thailandamide_TaiD_3_KS3_eDB               | Clade_99 |
| >thailandamide_TaiM_2_KS14_eDB              | Clade_99 |

**Supplementary Table 4: Selection of TransATor-based structure predictions of known metabolites and structures of the actual polyketides.** Accuracy: number of correctly assigned KS substrate specificities (only top hits; as determined by comparison with published biosynthetic proposals) divided by total number of KSs present in a PKS. Hydroxyl group stereochemistry shown in the TransATor-based prediction panel, but missing in the original TransATor output representation are based on KR Fuzzpro patterns.

| Polyketide | TransATor-based prediction                                                         | Actual polyketide                                                                   | KS substrates                                                                                                                                                                                                                                                                                                                                                                                                                                                                                                                                           | Original TransATor output                                                            | Accuracy       |
|------------|------------------------------------------------------------------------------------|-------------------------------------------------------------------------------------|---------------------------------------------------------------------------------------------------------------------------------------------------------------------------------------------------------------------------------------------------------------------------------------------------------------------------------------------------------------------------------------------------------------------------------------------------------------------------------------------------------------------------------------------------------|--------------------------------------------------------------------------------------|----------------|
| Pederin    | 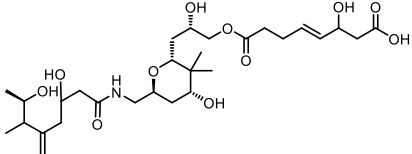  |   | KS1: GNAT starter<br>KS2: $\alpha$ L-Me $\beta$ D-OH<br>KS3: exomethyl/exoester<br>KS4: non-elongating (hemiacetal)<br>KS5: amino acids<br>KS6: $\beta$ D-OH<br>KS7: $\alpha$ L-(di)Me $\beta$ OH<br>KS8: pyran/furan rings<br>KS9: $\beta$ L-OH<br>KS10: oxidative rearrangement<br>KS11: completely reduced<br>KS12: double bonds ( <i>E</i> -configured)<br>KS13: non-elongating (double bonds)                                                                                                                                                      |   | 13/13<br>100%  |
| Oocydin    |  |  | KS1: phosphoglycerate-derived straters<br>KS2: exomethylene<br>KS3: oxidative rearrangement<br>KS4: beta-branch<br>KS5: non-elongating ( $\alpha$ D-OH $\beta$ L-OH)<br>KS6: $\alpha$ OH $\beta$ D-OH<br>KS7: $\beta$ L-OH<br>KS8: pyran/furan rings<br>KS9: completely reduced<br>KS10: non-elongating (various)<br>KS11: non-elongating (mostly $\beta$ OH)<br>KS12: shifted double bonds<br>KS13: $\alpha$ L-Me $\beta$ OH<br>KS14: $\alpha$ Me double bonds ( <i>Z</i> -configured)<br>KS15: non-elongating ( $\beta$ L-OH)<br>KS16: non-elongating |  | 14/16<br>87.5% |

|            |                                                                                    |                                                                                     |                                                                                                                                                                                                                                                                                                                                                                                                                                                                                                                                                                                                                                                                                                                                                                                                                                                                       |                                                                                      |               |
|------------|------------------------------------------------------------------------------------|-------------------------------------------------------------------------------------|-----------------------------------------------------------------------------------------------------------------------------------------------------------------------------------------------------------------------------------------------------------------------------------------------------------------------------------------------------------------------------------------------------------------------------------------------------------------------------------------------------------------------------------------------------------------------------------------------------------------------------------------------------------------------------------------------------------------------------------------------------------------------------------------------------------------------------------------------------------------------|--------------------------------------------------------------------------------------|---------------|
| Rhizoxin   | 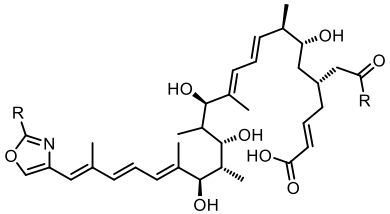  |   | <p>KS1: non-elongating (various specificities)<br/> KS2: non-elongating (oxazole/thiazole rings)<br/> KS3: amino acids (oxazole/thiazole rings)<br/> KS4: <math>\alpha</math> Me double bonds (<i>E</i>-configured)<br/> KS5: double bonds (<i>E</i>-configured)<br/> KS6: <math>\alpha</math> Me double bonds<br/> KS7: <math>\alpha</math> L-(di)Me <math>\beta</math> OH<br/> KS8: <math>\beta</math> D-OH<br/> KS9: <math>\alpha</math> L-(di)Me <math>\beta</math> OH<br/> KS10: shifted double bonds<br/> KS11: non-elongating (mostly <math>\alpha</math>-Me double bonds)<br/> KS12: shifted double bonds (some with <math>\alpha</math>-Me)<br/> KS13: <math>\beta</math> L-OH<br/> KS14: non-elongating (double bonds (mostly <i>Z</i>-configured))<br/> KS15: vinylogous chain branching/ (di)-methyl reduced<br/> KS16: non-elongating (double bonds)</p> |   | 13/16<br>81%  |
| Difficidin |  |  | <p>KS1: mainly double bonds<br/> KS2: <math>\alpha</math> Me double bonds (<i>E</i>-configured)<br/> KS3: completely reduced<br/> KS4: <math>\beta</math> D-OH (some with <math>\alpha</math> L-Me)<br/> KS5: non-elongating (bimodule <math>\beta</math> D-OH)<br/> KS6: double bonds (<i>Z</i>-configured)<br/> KS7: <math>\alpha</math> Me double bonds (<i>Z</i>-configured)<br/> KS8: <math>\beta</math> L-OH<br/> KS9: completely reduced<br/> KS10: bimodule <math>\beta</math> D-OH<br/> KS11: double bonds<br/> KS12: non-elongating (bimodule <math>\beta</math> D-OH)<br/> KS13: double bonds (<i>E</i>-configured)<br/> KS14: <math>\alpha</math> Me reduced/keto/D-OH</p>                                                                                                                                                                                |  | 14/14<br>100% |



|                                   |                                                                                    |                                                                                    |                                                                                                                                                                                                                                                                                                                                                                                                                                                                                                                                                                                                                                                                                                                                                                                                                                                                  |                                                                                     |              |
|-----------------------------------|------------------------------------------------------------------------------------|------------------------------------------------------------------------------------|------------------------------------------------------------------------------------------------------------------------------------------------------------------------------------------------------------------------------------------------------------------------------------------------------------------------------------------------------------------------------------------------------------------------------------------------------------------------------------------------------------------------------------------------------------------------------------------------------------------------------------------------------------------------------------------------------------------------------------------------------------------------------------------------------------------------------------------------------------------|-------------------------------------------------------------------------------------|--------------|
| Macrolactin                       | 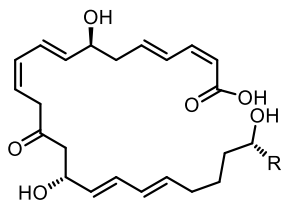  |  | <p>KS1: acetyl starter<br/>           KS2: <math>\beta</math> D-OH<br/>           KS3: completely reduced<br/>           KS4: <math>\beta</math>-keto or double bonds<br/>           KS5: <math>\beta</math>-keto or double bonds<br/>           KS6: <math>\beta</math> D-OH or <math>\beta</math> keto<br/>           KS7: <math>\beta</math>-keto or double bonds<br/>           KS8: bimodule <math>\beta</math> D-OH<br/>           KS9: <math>\beta</math>-keto or double bonds<br/>           KS10: <math>\beta</math>-keto or double bonds<br/>           KS11: bimodule <math>\beta</math> D-OH</p>                                                                                                                                                                                                                                                     |  | 10/11<br>90% |
| Predicted thailandamide structure |  |                                                                                    |                                                                                                                                                                                                                                                                                                                                                                                                                                                                                                                                                                                                                                                                                                                                                                               |                                                                                     |              |
| Actual structure of thailandamide |  |                                                                                    | <p>KS1: various starters<br/>           KS2: <math>\beta</math> L-OH<br/>           KS3: double bonds (<i>E</i>-configured)<br/>           KS4: non-elongating (<math>\alpha</math>-Me completely reduced or shifted double bond)<br/>           KS5: amino acids<br/>           KS6: double bonds (mostly <i>E</i>-configured)<br/>           KS7: beta branch<br/>           KS8: non-elongating (bimodule <math>\beta</math> D-OH)<br/>           KS9: double bonds<br/>           KS10: <math>\beta</math>-keto or double bonds<br/>           KS11: <math>\beta</math> D-OH<br/>           KS12: double bonds (<i>E</i>-configured)<br/>           KS13: beta branch<br/>           KS14: double bonds (<i>E</i>-configured)<br/>           KS15: a Me double bonds (<i>E</i>-configured)<br/>           KS16: non-elongating (<math>\beta</math> D-OH)</p> |                                                                                     | 15/16<br>94% |

**Supplementary Table 5: Comparison between TransATor, PRISM3, and antiSMASH4.0-based structural predictions of *trans*-AT PKS-derived polyketides that were not part of the initial training set used to generate HMMs for TransATor and that were deposited to GenBank.** No accuracy predictions could be made for PRISM3-based predictions, as predicted structures differ too much from isolated compounds and no monomers are predicted. Accuracy: the provided ratio values signify the number of correctly assigned KS and A domain substrates (only top hits; as determined by comparison with published biosynthetic proposals) divided by the total number of KSs and A domains present in a PKS. The percentage value denotes the number of correctly assigned substrate specificities divided by total number of KS and A domains. The shown structures are outputs of the respective prediction tools (for TransATor predictions structures are derived from predictions in “Viewer” window). antiSMASH nomenclature: mal:  $\beta$  keto; ohmal:  $\beta$  hydroxyl. For monomer predictions in antiSMASH and TransATor, KSs were sorted according to their location in the proposed biosynthetic pathway. Green: correct prediction; red: incorrect prediction.

| Actual polyketide                                                                                                                                                                                                                                                                                                                                                                                                            | TransATor prediction                                                                                                                                                                                                                                                                                                                                                                                                                                                            | PRISM3 prediction                                                                                                                                                                             | antiSMASH4.0 prediction                                                             |
|------------------------------------------------------------------------------------------------------------------------------------------------------------------------------------------------------------------------------------------------------------------------------------------------------------------------------------------------------------------------------------------------------------------------------|---------------------------------------------------------------------------------------------------------------------------------------------------------------------------------------------------------------------------------------------------------------------------------------------------------------------------------------------------------------------------------------------------------------------------------------------------------------------------------|-----------------------------------------------------------------------------------------------------------------------------------------------------------------------------------------------|-------------------------------------------------------------------------------------|
| 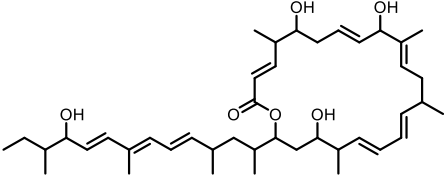<br>Macrobrevin <sup>9</sup><br>( <i>Brevibacillus</i> sp. Leaf 182)                                                                                                                                                                                                                                                                        | <br>Accuracy: 15/19                      79%                                                                                                                                                                                                                                                                                                                                                  | <br>No monomers predicted                                                                                  |  |
| KS1: acetyl starters<br>KS2: $\alpha$ Me reduced<br>KS3: $\beta$ OH<br>KS4: $\alpha$ Me shifted double bonds<br>KS5: non-elongating (double bonds)<br>KS6: shifted double bonds<br>KS7: $\alpha$ -Me shifted double bonds<br>KS8: $\alpha$ -Me reduced<br>KS9: $\beta$ OH<br>KS10: $\alpha$ Me OH<br>KS11: double bonds<br>KS12: double bonds<br>KS13: beta-branch<br>KS14: $\alpha$ Me double bonds ( <i>E</i> -configured) | KS1: various starters<br>KS2: $\alpha$ Me reduced/keto/D-OH<br>KS3: double bonds (mostly <i>e</i> -configured)<br>KS4: $\alpha$ Me reduced/keto/D-OH<br>KS5: non-elongating ( $\alpha$ -Me double bonds)<br>KS6: shifted double bonds (with $\alpha$ -Me)<br>KS7: $\alpha$ Me reduced/keto/D-OH<br>KS8: $\alpha$ Me reduced/keto/D-OH<br>KS9: $\beta$ D-OH (some with $\alpha$ L-Me)<br>KS10: $\alpha$ Me reduced/keto/D-OH<br>KS11: double bonds (mostly <i>E</i> -configured) | KS1: ohmal<br>KS2: ohmal<br>KS3: ohmal<br>KS4: ohmal<br>KS5: mal<br>KS6: mal<br>KS7: ohmal<br>KS8: mal<br>KS9: ohmal<br>KS10: ohmal<br>KS11: ohmal<br>KS12: mal<br>KS13: ohmal<br>KS14: ohmal |                                                                                     |

|                                                                                                                                                                                                                                                                                                                                                                                                                                        |                                                                                                                                                                                                                                                                                                                                                                                                                                 |                                                                                                                  |                                                                                                                                                                            |
|----------------------------------------------------------------------------------------------------------------------------------------------------------------------------------------------------------------------------------------------------------------------------------------------------------------------------------------------------------------------------------------------------------------------------------------|---------------------------------------------------------------------------------------------------------------------------------------------------------------------------------------------------------------------------------------------------------------------------------------------------------------------------------------------------------------------------------------------------------------------------------|------------------------------------------------------------------------------------------------------------------|----------------------------------------------------------------------------------------------------------------------------------------------------------------------------|
| <p>KS15: <math>\beta</math> OH<br/> KS16: non-elongating (bimodule <math>\beta</math> D-OH)<br/> KS17: shifted double bonds<br/> KS18: <math>\alpha</math> Me D-OH<br/> KS19: non-elongating (double bonds)</p>                                                                                                                                                                                                                        | <p>KS12: double bonds (mostly <i>E</i>-configured)<br/> KS13: beta-branch<br/> KS14: <math>\alpha</math> Me double bonds (<i>E</i>-configured)<br/> KS15: <math>\beta</math> L-OH<br/> KS16: non-elongating (bimodule <math>\beta</math> D-OH)<br/> KS17: double bonds (<i>E</i>-configured)<br/> KS18: <math>\alpha</math> Me reduced/keto/D-OH<br/> KS19: non-elongating (double bonds)</p>                                   |                                                                                                                  | <p>KS15: ohmal<br/> KS16: mal<br/> KS17: ohmal<br/> KS18: ohmal<br/> KS19: mal</p>                                                                                         |
| 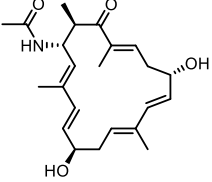 <p>Chejuenolide<sup>10</sup><br/> (<i>Hahella chejuensis</i> MB-1084)<br/> PKS contains iterative modules</p> <p>A1: gly<br/> KS1: amino acids (glycine)<br/> KS2: <math>\alpha</math> Me double bonds (<i>E</i>-configured)<br/> KS3: double bonds (<i>E</i>-configured)<br/> KS4: <math>\beta</math> -OH<br/> KS5: <math>\alpha</math> Me b-OH</p> |  <p>Accuracy: 5/6                      83%</p> <p>A1: gly<br/> KS1: amino acids (glycine)<br/> KS2: double bonds (<i>E</i>-configured) (some with <math>\alpha</math> Me)<br/> KS3: double bonds (<i>E</i>-configured)<br/> KS4: various specificities (mainly <math>\alpha</math>-Me)<br/> KS5: <math>\alpha</math> Me reduced/keto/D-OH</p> |  <p>No monomers predicted</p> |  <p>A1: Gly<br/> KS1: mal<br/> KS2: mal<br/> KS3: ohmal<br/> KS4: mal<br/> KS5: mal</p> |
|  <p>Lacunalide<sup>11</sup><br/> (<i>Gyvuella sunshinyii</i>)</p>                                                                                                                                                                                                                                                                                   |  <p>Accuracy: 21/25                      84%</p>                                                                                                                                                                                                                                                                                            |                             |                                                                                       |

|                                                                                                                                                                                                                                                                                                                                                                                                                                                                                                                                                                                                                                                                                                                                                                                                                                                                                                                                   |                                                                                                                                                                                                                                                                                                                                                                                                                                                                                                                                                                                                                                                                                                                                                                                                                                                                                                                                                                                                                                                                                                                                                                                                                                                                          |                                                                                                                         |                                                                                                                                             |
|-----------------------------------------------------------------------------------------------------------------------------------------------------------------------------------------------------------------------------------------------------------------------------------------------------------------------------------------------------------------------------------------------------------------------------------------------------------------------------------------------------------------------------------------------------------------------------------------------------------------------------------------------------------------------------------------------------------------------------------------------------------------------------------------------------------------------------------------------------------------------------------------------------------------------------------|--------------------------------------------------------------------------------------------------------------------------------------------------------------------------------------------------------------------------------------------------------------------------------------------------------------------------------------------------------------------------------------------------------------------------------------------------------------------------------------------------------------------------------------------------------------------------------------------------------------------------------------------------------------------------------------------------------------------------------------------------------------------------------------------------------------------------------------------------------------------------------------------------------------------------------------------------------------------------------------------------------------------------------------------------------------------------------------------------------------------------------------------------------------------------------------------------------------------------------------------------------------------------|-------------------------------------------------------------------------------------------------------------------------|---------------------------------------------------------------------------------------------------------------------------------------------|
| <p>KS1: acetyl starters<br/> KS2: <math>\beta</math> D-OH<br/> KS3: completely reduced<br/> KS4: completely reduced<br/> KS5: <math>\beta</math> D-OH with <math>\alpha</math> L-Me<br/> KS6: <math>\beta</math> D-OH with <math>\alpha</math> L-Me<br/> KS7: double bonds <i>E</i>-configured<br/> KS8: completely reduced<br/> KS9: completely reduced<br/> KS10: completely reduced<br/> KS11: <math>\beta</math> D-OH<br/> KS12: completely reduced<br/> KS13: <math>\beta</math> D-OH<br/> KS14: completely reduced<br/> KS15: <math>\beta</math> D-OH<br/> KS16: double bond with a Me<br/> KS17: a Me D-OH<br/> KS18: <math>\beta</math> L-OH<br/> KS19: <math>\beta</math> D-OH<br/> KS20: <math>\beta</math> L-OH<br/> KS21: <math>\beta</math> D-OH<br/> KS22: <math>\beta</math> L-OH<br/> KS23: <math>\beta</math> D-OH<br/> KS24: double bond e-configured<br/> KS25: non-elongating (double bonds e-configured)</p> | <p><b>KS1: various starters</b><br/> KS2: <math>\beta</math> D-OH (some with <math>\alpha</math> L-Me)<br/> KS3: completely reduced<br/> KS4: completely reduced<br/> KS5: <math>\beta</math> D-OH (some with <math>\alpha</math> L-Me)<br/> KS6: <math>\beta</math> D-OH (some with <math>\alpha</math> L-Me)<br/> KS7: double bonds (mostly <i>E</i>-configured)<br/> KS8: completely reduced<br/> KS9: completely reduced<br/> KS10: completely reduced<br/> KS11: <math>\beta</math> D-OH<br/> KS12: completely reduced<br/> KS13: <math>\beta</math> D-OH (some with <math>\alpha</math> L-Me)<br/> KS14: completely reduced<br/> KS15: D-OH<br/> <b>KS16: <math>\beta</math> D-OH (some with <math>\alpha</math> L-Me)</b><br/> KS17: <math>\beta</math> D-OH (some with <math>\alpha</math> L-Me)<br/> KS18: <math>\beta</math> L-OH<br/> KS19: <math>\beta</math> D-OH (some with <math>\alpha</math> L-Me)<br/> KS20: <math>\beta</math> L-OH<br/> KS21: <math>\beta</math> D-OH<br/> KS22: <math>\beta</math> L-OH<br/> KS23: <math>\beta</math> D-OH (some with <math>\alpha</math> L-Me)<br/> <b>KS24: <math>\beta</math> D-OH (some with <math>\alpha</math> L-Me)</b><br/> <b>KS25: : <math>\beta</math> D-OH (some with <math>\alpha</math> L-Me)</b></p> | <p>No monomers predicted</p>                                                                                            | <p>No monomers predicted</p>                                                                                                                |
| <p>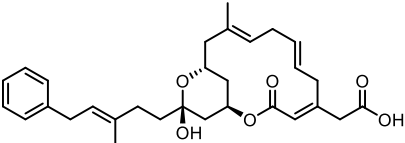<br/> Ripostatin<sup>12</sup><br/> (<i>Sorangium cellulosum</i>)</p> <p>KS1: cis-AT PKS<br/> KS2: <math>\alpha</math> Me double bond</p>                                                                                                                                                                                                                                                                                                                                                                                                                                                                                                                                                                                                                                                                                                    | <p><br/> Accuracy: 5/9 56%</p> <p>KS1: cis-AT PKS</p>                                                                                                                                                                                                                                                                                                                                                                                                                                                                                                                                                                                                                                                                                                                                                                                                                                                                                                                                                                                                                                                                                                                                | <p><br/> No monomers predicted</p> | <p><br/> <b>KS1: ccmal</b><br/> <b>KS2: redmal</b></p> |

|                                                                                                                                                                                                                                                                                                                                                                                                                                                                                                                                                  |                                                                                                                                                                                                                                                                                                                                                                                                                                                                                                                                                                                                                                                            |                                                                                                                 |                                                                                                                                                                                                                                                                        |
|--------------------------------------------------------------------------------------------------------------------------------------------------------------------------------------------------------------------------------------------------------------------------------------------------------------------------------------------------------------------------------------------------------------------------------------------------------------------------------------------------------------------------------------------------|------------------------------------------------------------------------------------------------------------------------------------------------------------------------------------------------------------------------------------------------------------------------------------------------------------------------------------------------------------------------------------------------------------------------------------------------------------------------------------------------------------------------------------------------------------------------------------------------------------------------------------------------------------|-----------------------------------------------------------------------------------------------------------------|------------------------------------------------------------------------------------------------------------------------------------------------------------------------------------------------------------------------------------------------------------------------|
| <p>KS3: reduced<br/> KS4: <math>\beta</math> keto<br/> KS5: <math>\beta</math> D-OH<br/> KS6: <math>\beta</math> D-OH<br/> KS7: <math>\beta</math> Me double bond<br/> KS8: completely reduced<br/> KS9: shifted double bonds (some with <math>\alpha</math>-Me)</p>                                                                                                                                                                                                                                                                             | <p>KS2: cis-AT PKS<br/> KS3: cis-AT PKS<br/> KS4: <math>\beta</math> D-OH or <math>\beta</math> keto<br/> KS5: <math>\beta</math> D-OH or <math>\beta</math> keto<br/> KS6: various specificities<br/> KS7: <math>\beta</math> OMe or <math>\beta</math> Me double bond<br/> KS8: bimodule <math>\beta</math> D-OH<br/> KS9: shifted double bonds (some with <math>\alpha</math>-Me)</p>                                                                                                                                                                                                                                                                   |                                                                                                                 | <p>KS3: mal<br/> KS4: ohmal<br/> KS5: ohmal<br/> KS6: mal<br/> KS7: ohmal<br/> KS8: mal<br/> KS9: ccmal</p>                                                                                                                                                            |
| 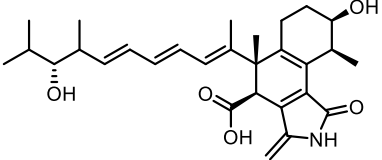 <p>Pyxipyrrolone<sup>13</sup><br/> (<i>Pyxidicoccus</i> sp.)</p> <p>KS0: loading<br/> KS1: isobutyl starter<br/> KS2: skipped?<br/> KS3: <math>\alpha</math>-Me b-OH<br/> KS4: double bond (e-configured)<br/> KS5: double bond (e-configured)<br/> KS6: <math>\alpha</math>-Me double bond<br/> KS7: <math>\beta</math> Me double bond<br/> KS8: double bond (e-configured)<br/> KS9: <math>\alpha</math>-L-Me b-keto<br/> A1: ser<br/> KS10: amino acids</p> |  <p>Accuracy: 6/11                      55%</p> <p>KS1: acetyl starter<br/> KS2: <math>\beta</math> D-OH or <math>\beta</math> keto<br/> KS2: <math>\alpha</math>-L-Me red or OH<br/> KS4: <math>\alpha</math>-L-Me red or OH<br/> KS4: <math>\beta</math> D-OH<br/> KS5: double bonds (e-configured)<br/> KS6: <math>\alpha</math>-Me double bond<br/> KS7: <math>\beta</math> OMe or <math>\beta</math> Me double bond<br/> KS8: <math>\alpha</math>-L-Me red or OH<br/> KS9: <math>\alpha</math>-Me shifted double bond or OH<br/> A1: ser<br/> KS10: amino acids</p> |  <p>No monomer predicted</p> |  <p>KS1: mal<br/> KS2: mal<br/> KS3: ohmal<br/> KS4: mal<br/> KS5: mal<br/> KS6: ohmal<br/> KS7: mal<br/> KS8: ohmal<br/> KS9: mal<br/> KS10: mal<br/> A1: ser<br/> KS11: ohmal</p> |
|                                                                                                                                                                                                                                                                                                                                                                                                                                                               |                                                                                                                                                                                                                                                                                                                                                                                                                                                                                                                                                                        |                                                                                                                 |                                                                                                                                                                                                                                                                        |

|                                                                                                                                                                                                                                                                                                                                                                                                                                                                                                                                                                                                                                                                                                                                          |                                                                                                                                                                                                                                                                                                                                                                                                                                                                                                                                                           |                                                                                                                 |                                                                                                                                                                                                                                                                             |
|------------------------------------------------------------------------------------------------------------------------------------------------------------------------------------------------------------------------------------------------------------------------------------------------------------------------------------------------------------------------------------------------------------------------------------------------------------------------------------------------------------------------------------------------------------------------------------------------------------------------------------------------------------------------------------------------------------------------------------------|-----------------------------------------------------------------------------------------------------------------------------------------------------------------------------------------------------------------------------------------------------------------------------------------------------------------------------------------------------------------------------------------------------------------------------------------------------------------------------------------------------------------------------------------------------------|-----------------------------------------------------------------------------------------------------------------|-----------------------------------------------------------------------------------------------------------------------------------------------------------------------------------------------------------------------------------------------------------------------------|
| <p>Alpiniamide<sup>14</sup><br/>(<i>Streptomyces</i> sp. IB2014/011-12)</p> <p>KS1: cis-AT PKS loading<br/>KS2: double bond (<i>E</i>-configured)<br/>KS3: non-elongating (<math>\alpha</math>-Me <math>\beta</math>-OH)<br/>A1: gly<br/>KS4: amino acids<br/>KS5: <math>\alpha</math> Me keto</p>                                                                                                                                                                                                                                                                                                                                                                                                                                       | <p>Accuracy: 5/6                      83%</p> <p>KS1: cis-AT PKS<br/>KS2: cis-AT PKS<br/>KS3: non-elongating (<math>\alpha</math>-Me completely reduced or shifted double bond)<br/>A1: gly<br/>KS4: amino acids<br/>KS5: <math>\alpha</math> Me reduced/keto/D-OH</p>                                                                                                                                                                                                                                                                                    | 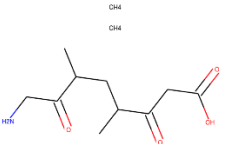 <p>No monomer predicted</p> |  <p>KS1: mal<br/>A1: gly<br/>KS2: ccmal</p>                                                                                                                                              |
|  <p>Phthoxazolin A<sup>15</sup><br/>(<i>Streptomyces avermitilis</i>)<br/>The PKS has additional modules that suggest phthoxazolin A is a cleavage product of a larger polyketide</p> <p>A1: gly<br/>KS1: amino acids<br/>KS2: amino acids<br/>KS3: double bonds (<i>E</i>-configured)<br/>KS4: double bonds (<i>Z</i>-configured)<br/>KS5: <math>\alpha</math>-Me double bond<br/>A2: gly<br/>KS6: amino acids (glycine)<br/>KS7: double bonds (<i>E</i>-configured)<br/>KS8: non-elongating (bimodule <math>\beta</math> D-OH)<br/>KS9: double bonds (mostly <i>E</i>-configured)<br/>KS10: non-elongating (double bonds)<br/>A3: ser<br/>A4: tyr</p> |  <p>Accuracy: 14/14                      100%</p> <p>A1: gly<br/>KS1: amino acids<br/>KS2: amino acids<br/>KS3: double bonds<br/>KS4: double bonds<br/>KS5: <math>\alpha</math>-Me double bond<br/>A2: gly<br/>KS6: amino acids (glycine)<br/>KS7: double bonds (<i>E</i>-configured)<br/>KS8: non-elongating (bimodule <math>\beta</math> D-OH)<br/>KS9: double bonds (mostly <i>E</i>-configured)<br/>KS10: non-elongating (double bonds)<br/>A3: ser<br/>A4: tyr</p> |  <p>No monomer predicted</p> |  <p>A1: gly<br/>KS1: mal<br/>KS2: ohmal<br/>KS3: ohmal<br/>KS4: ohmal<br/>KS5: ohmal<br/>A2: gly<br/>KS6: ohmal<br/>KS7: ohmal<br/>KS8: mal<br/>KS9: ohmal<br/>KS10: mal<br/>A3: ser</p> |

|                                                                                                                                                                                                                                                                                                                                                                                                                                                                                                                                                                                                                                                                                                                                                                                  |                                                                                                                                                                                                                                                                                                                                                                                                                                                                                                                                                                                                                                                                                                                                                                                                                                              |                                                                                                                  |                                                                                                                                                                                                                                                                                                                                                                                                                               |
|----------------------------------------------------------------------------------------------------------------------------------------------------------------------------------------------------------------------------------------------------------------------------------------------------------------------------------------------------------------------------------------------------------------------------------------------------------------------------------------------------------------------------------------------------------------------------------------------------------------------------------------------------------------------------------------------------------------------------------------------------------------------------------|----------------------------------------------------------------------------------------------------------------------------------------------------------------------------------------------------------------------------------------------------------------------------------------------------------------------------------------------------------------------------------------------------------------------------------------------------------------------------------------------------------------------------------------------------------------------------------------------------------------------------------------------------------------------------------------------------------------------------------------------------------------------------------------------------------------------------------------------|------------------------------------------------------------------------------------------------------------------|-------------------------------------------------------------------------------------------------------------------------------------------------------------------------------------------------------------------------------------------------------------------------------------------------------------------------------------------------------------------------------------------------------------------------------|
| 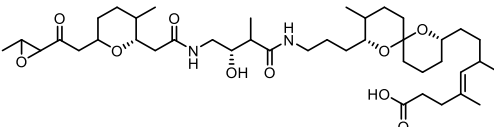 <p>Lagriamide<sup>16</sup><br/>(<i>Burkholderia gladioli</i> Lv-StB)</p> <p>KS1: GNAT starter<br/> KS2: double bond <i>E</i>-configured<br/> KS3: L-OH<br/> KS4: double bond <i>E</i>-configured<br/> KS5: <math>\alpha</math>-Me<br/> KS6: non-elongating (double bonds)<br/> A1: gly<br/> KS7: amino acids<br/> KS8: <math>\alpha</math> L-Me <math>\beta</math> OH<br/> A1: gly<br/> KS9: amino acids<br/> KS10: completely reduced<br/> KS11: <math>\alpha</math> L-Me <math>\beta</math> OH<br/> KS12: completely reduced<br/> KS13: skipped<br/> KS14: D-OH<br/> KS15: completely reduced<br/> KS16: <math>\beta</math> L-OH<br/> KS17: <math>\alpha</math> Me DB<br/> KS18: reduced</p> |  <p>Accuracy: 17/20      85%</p> <p>KS1: <i>cis</i>-AT PKS<br/> KS2: double bonds (mostly <i>E</i>-configured)<br/> KS3: L-OH<br/> KS4: double bonds (mostly <i>E</i>-configured)<br/> KS5: <math>\alpha</math>-Me<br/> KS6: non-elongating (double bonds)<br/> A1: gly<br/> KS7: amino acids<br/> KS8: <math>\alpha</math> L-Me <math>\beta</math> OH<br/> A2: gly<br/> KS9: amino acids<br/> KS10: completely reduced<br/> KS11: <math>\alpha</math> L-(di)Me <math>\beta</math> OH<br/> KS12: completely reduced<br/> KS13: <math>\alpha</math> Me double bonds<br/> KS14: D-OH<br/> KS15: completely reduced<br/> KS16: <math>\beta</math> L-OH<br/> KS17: <math>\alpha</math> Me reduced/keto/D-OH<br/> KS18: <math>\alpha</math> Me double bonds</p> |  <p>No monomers predicted</p> | <p>A4: ala</p>  <p>KS1: ohmal<br/> KS2: ohmal<br/> KS3: ohmal<br/> KS4: ohmal<br/> KS5: ohmal<br/> KS6: mal<br/> A1: gly<br/> KS7: ohmal<br/> KS8: mal<br/> A2: gly<br/> KS9: ohmal<br/> KS10: ohmal<br/> KS11: ohmal<br/> KS12: mal<br/> KS13: ohmal<br/> KS14: ohmal<br/> KS15: ohmal<br/> KS16: ohmal<br/> KS16: mal<br/> KS17: mal</p> |
|----------------------------------------------------------------------------------------------------------------------------------------------------------------------------------------------------------------------------------------------------------------------------------------------------------------------------------------------------------------------------------------------------------------------------------------------------------------------------------------------------------------------------------------------------------------------------------------------------------------------------------------------------------------------------------------------------------------------------------------------------------------------------------|----------------------------------------------------------------------------------------------------------------------------------------------------------------------------------------------------------------------------------------------------------------------------------------------------------------------------------------------------------------------------------------------------------------------------------------------------------------------------------------------------------------------------------------------------------------------------------------------------------------------------------------------------------------------------------------------------------------------------------------------------------------------------------------------------------------------------------------------|------------------------------------------------------------------------------------------------------------------|-------------------------------------------------------------------------------------------------------------------------------------------------------------------------------------------------------------------------------------------------------------------------------------------------------------------------------------------------------------------------------------------------------------------------------|

|                                                                                                                                                                                                                                                                                                                                                                                                                                                                                                                                                          |                                                                                                                                                                                                                                                                                                                                                                                                                                                                                                                         |                                                                                                                  |                                                                                                                                                                                                                                                                    |
|----------------------------------------------------------------------------------------------------------------------------------------------------------------------------------------------------------------------------------------------------------------------------------------------------------------------------------------------------------------------------------------------------------------------------------------------------------------------------------------------------------------------------------------------------------|-------------------------------------------------------------------------------------------------------------------------------------------------------------------------------------------------------------------------------------------------------------------------------------------------------------------------------------------------------------------------------------------------------------------------------------------------------------------------------------------------------------------------|------------------------------------------------------------------------------------------------------------------|--------------------------------------------------------------------------------------------------------------------------------------------------------------------------------------------------------------------------------------------------------------------|
| 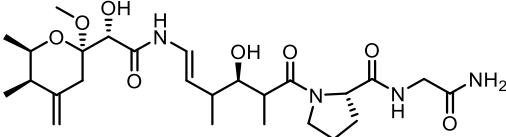 <p>Cusperin<sup>17</sup><br/>(<i>Cuspidothrix issatschenkoi</i>)</p> <p>KS1: GNAT starter<br/> KS2: <math>\alpha</math> L-Me <math>\beta</math> D-OH<br/> KS3: exomethyl/exoester<br/> KS4: non-elongating (hemiacetale)<br/> A1: gly<br/> KS5: amino acids<br/> KS6: non-elongating (double bonds)<br/> KS7: shifted double bonds with <math>\alpha</math>-Me<br/> KS8: non-elongating (<math>\alpha</math>-Me <math>\beta</math> D-OH)<br/> A2: pro<br/> A3: gly</p> |  <p>Accuracy: 11/11      100%</p> <p>KS1: GNAT starter<br/> KS2: <math>\alpha</math> L-Me <math>\beta</math> D-OH<br/> KS3: exomethyl/exoester<br/> KS4: non-elongating (hemiacetale)<br/> A1: gly<br/> KS5: amino acids<br/> KS6: non-elongating (<math>\alpha</math>-Me double bonds)<br/> KS7: shifted double bonds (with <math>\alpha</math>-Me)<br/> KS8: non-elongating (<math>\beta</math> D-OH)<br/> A2: pro<br/> A3: gly</p> |  <p>No monomers predicted</p> |  <p>KS1: ohmal<br/> KS2: mal<br/> KS3: ohmal<br/> KS4: mal<br/> A1: gly<br/> KS5: ohmal<br/> KS6: mal<br/> KS7: ohmal<br/> KS8: mal<br/> A2: pro<br/> A3: gly<br/> KS9: mal</p> |
| <p>Total accuracy of TransATor<br/>(absolute/relativ)</p>                                                                                                                                                                                                                                                                                                                                                                                                                                                                                                | <p>99/121      82%</p>                                                                                                                                                                                                                                                                                                                                                                                                                                                                                                  |                                                                                                                  | <p>21/96      22%</p>                                                                                                                                                                                                                                              |



**Supplementary Table 6: Proteins encoded in the tartrolon (*tar*) BGC and their putative functions.**

| Protein | Amino acids | Proposed function                                | Closest homolog                                         | Identity (%) | Accession number <sup>7</sup> |
|---------|-------------|--------------------------------------------------|---------------------------------------------------------|--------------|-------------------------------|
| TarK    | 211         | TetR/AcrR family transcriptional regulator       | <i>Saccharospirillum impatiens</i> (WP_037337596.1)     | 57           | WP_044617971.1                |
| TarL    | 259         | enoyl-CoA hydratase                              | <i>Rheinheimera nanhaiensis</i> (WP_008218131.1)        | 41           | WP_044617970.1                |
| TarM    | 959         | peptidase M16                                    | <i>Motiliproteus</i> sp. MSK22-1 (WP_076719499.1)       | 56           | WP_076719499.1                |
| TarO    | 193         | thymidine kinase                                 | <i>Vibrio</i> sp. S234-5 (WP_045571983.1)               | 65           | WP_044617968.1                |
| TarP    | 407         | Cyclic di-GMP phosphodiesterase                  | <i>Marinimicrobium</i> sp. LS-A18 (WP_024461494.1)      | 42           | WP_052830363.1                |
| TarB    | 289         | AT                                               | <i>Teredinibacter</i> (WP_018276260.1)                  | 74           | WP_044617967.1                |
| TarQ    | 236         | hypothetical protein                             | <i>Teredinibacter turnerae</i> (WP_018416731.1)         | 65           | WP_044620136.1                |
| TarD    | 4388        | PKS (DH*-KR*-FkbH-ACP-KS-DH-KR-ACP-KS-KR-ACP-KS) | <i>Teredinibacter turnerae</i> (WP_018416727.1)         | 51           | AJQ95776.1                    |
| TarE    | 4856        | PKS (KR-ACP-KS-DH-KR-MT-ACP-KS-ACP-KS-ACP)       | <i>Teredinibacter</i> sp. 991H.S.0a.06 (WP_045825587.1) | 52           | WP_044620134.1                |
| TarF    | 4540        | PKS (KR-ACP-KS-DH-KR-MT-ACP-KS-ACP-KS-ACP)       | <i>Teredinibacter turnerae</i> (WP_028876839.1)         | 54           | AJQ95774.1                    |
| TarG    | 372         | Flavin-dependent oxidoreductase                  | <i>Teredinibacter turnerae</i> (WP_028886452.1)         | 82           | WP_044617966.1                |
| TarH    | 262         | TE                                               | <i>Teredinibacter turnerae</i> (WP_028886452.1)         | 50           | WP_082070762.1                |
| TarR    | 283         | ABC transporter ATP-binding protein              | <i>Enterovibrio pacificus</i> (WP_068904725.1)          | 70           | WP_044617965.1                |
| TarS    | 227         | hypothetical protein                             | <i>Enterovibrio pacificus</i> (WP_068904723.1)          | 55           | WP_044617964.1                |
| TarT    | 241         | hypothetical protein                             | <i>Enterovibrio pacificus</i> (WP_068904723.1)          | 64           | WP_044617963.1                |
| TarI    | 452         | dioxygenase                                      | <i>Teredinibacter turnerae</i> (WP_028886454.1)         | 77           | WP_044617962.1                |

**Supplementary Table 7: Deduced proteins encoded on the *lept* BGC and their putative functions.**

| Gene | Protein | Protein size | Proposed function                                                     | Closest homolog*                                          | Identity | Accession number |
|------|---------|--------------|-----------------------------------------------------------------------|-----------------------------------------------------------|----------|------------------|
| 431  | LeptA   | 532          | ABC transporter permease/secreted hydrolase                           | <i>Leptolyngbya</i> sp.<br>ISBN3-Nov-94-8<br>(AMH40428.1) | 38%      | WP_006512961.1   |
| 430  | LeptB   | 417          | hypothetical protein                                                  | delta proteobacterium<br>NaphS2 (EFK06465.1)              | 45%      | WP_006512960.1   |
| 429  | LeptC   | 84           | hypothetical protein                                                  | <i>Desulfobacter hydrogenophilus</i><br>(WP_111956780.1)  | 46%      | WP_006512959.1   |
| 428  | LeptD   | 476          | class III lipase                                                      | <i>Leptolyngbya</i> sp.<br>ISBN3-Nov-94-8<br>(AMH40431.1) | 52%      | WP_006512958.1   |
| 427  | LeptE   | 292          | alpha/beta hydrolase/AT                                               | Planctomycetes bacterium<br>(REK15718.1)                  | 37%      | WP_006512957.1   |
| 426  | LeptF   | 477          | class III lipase                                                      | <i>Leptolyngbya</i> sp.<br>ISBN3-Nov-94-8<br>(AMH40431.1) | 62%      | WP_006512956.1   |
| 425  | LeptG   | 407          | class III lipase                                                      | <i>Leptolyngbya</i> sp.<br>ISBN3-Nov-94-8<br>(AMH40431.1) | 94%      | WP_006512955.1   |
| 424  | LeptH   | 417          | 3-oxoacyl-acyl-carrier protein synthase                               | <i>Leptolyngbya</i> sp.<br>ISBN3-Nov-94-8<br>(AMH40432.1) | 96%      | WP_006512954.1   |
| 423  | LeptI   | 85           | ACP                                                                   | <i>Leptolyngbya</i> sp.<br>ISBN3-Nov-94-8<br>(AMH40442.1) | 99%      | WP_006512953.1   |
| 422  | LeptJ   | 315          | AT (malonyl-CoA)                                                      | <i>Leptolyngbya</i> sp.<br>ISBN3-Nov-94-8<br>(AMH40435.1) | 94%      | WP_006512952.1   |
| 421  | LeptK   | 326          | malonyl CoA-acyl carrier protein transacylase                         | <i>Leptolyngbya</i> sp.<br>ISBN3-Nov-94-8<br>(AMH40436.1) | 99%      | WP_006512951.1   |
| 420  | LeptL   | 5057         | PKS (DH-FkbM-FkbH-ACP-KS-ECH-ECH-ACP-ACP-KS-KR-ACP-KS-KR)             | <i>Leptolyngbya</i> sp.<br>ISBN3-Nov-94-8<br>(AMH40422.1) | 93%      | WP_006512950.1   |
| 419  | LeptM   | 7161         | PKS (MT-ACP-KS-KR-ACP-KS-KR-MT-ACP-KS-KR-ACP-KS-ACP-ACP-KS-MT-KR-ACP) | <i>Leptolyngbya</i> sp.<br>ISBN3-Nov-94-8<br>(AMH40421.1) | 92%      | WP_006512949.1   |
| 418  | LeptN   | 589          | Ser/Thr protein kinase                                                | <i>Leptolyngbya</i> sp.<br>ISBN3-Nov-94-8<br>(AMH40427.1) | 95%      | WP_006512948.1   |
| 417  | LeptO   | 384          | Flavin dependent mono-oxygenase                                       | <i>Leptolyngbya</i> sp.<br>ISBN3-Nov-94-8<br>(AMH40433.1) | 99%      | WP_006512947.1   |
| 416  | LeptP   | 4430         | PKS (KS-ACP-KS-KR-ACP-KS-DH-PS-KR-ACP-KS-ACP)                         | <i>Leptolyngbya</i> sp.<br>ISBN3-Nov-94-8<br>(AMH40423.1) | 89%      | WP_006512946.1   |
| 415  | LeptQ   | 4309         | PKS (ACP-KS-KR-ACP-KS-ACP-ACP-ACP-KS-ACP-C)                           | <i>Leptolyngbya</i> sp.<br>ISBN3-Nov-94-8<br>(AMH40443.1) | 61%      | WP_006512945.1   |
| 414  | LeptR   | 634          | FAD-dependent halogenase                                              | <i>Leptolyngbya</i> sp.<br>ISBN3-Nov-94-8<br>(AMH40426.1) | 96%      | WP_006512944.1   |
| 413  | LeptS   | 559          | hydrolase                                                             | <i>Leptolyngbya</i> sp.<br>ISBN3-Nov-94-8<br>(AMH40428.1) | 93%      | WP_006512943.1   |
| 412  | LeptT   | 115          | hypothetical protein                                                  | <i>Leptolyngbya</i> sp.<br>ISBN3-Nov-94-8<br>(AMH40441.1) | 95%      | WP_006512942.1   |
| 411  | LeptU   | 237          | PPTase                                                                | <i>Leptolyngbya</i> sp.<br>ISBN3-Nov-94-8<br>(AMH40439.1) | 89%      | WP_006512941.1   |
| 410  | LeptV   | 486          | long-chain fatty acid CoA-ligase                                      | <i>Leptolyngbya</i> sp.<br>ISBN3-Nov-94-8<br>(AMH40429.1) | 95%      | WP_006512940.1   |

|     |        |      |                                                              |                                                       |     |     |                |
|-----|--------|------|--------------------------------------------------------------|-------------------------------------------------------|-----|-----|----------------|
| 409 | LeptW  | 255  | enoyl-CoA hydratase                                          | <i>Leptolyngbya</i><br>ISBN3-Nov-94-8<br>(AMH40437.1) | sp. | 97% | WP_006512939.1 |
| 408 | LeptX  | 255  | enoyl-CoA hydratase                                          | <i>Leptolyngbya</i><br>ISBN3-Nov-94-8<br>(AMH40438.1) | sp. | 98% | WP_006512938.1 |
| 407 | LeptY  | 440  | HMG-CoA synthase                                             | <i>Leptolyngbya</i><br>ISBN3-Nov-94-8<br>(AMH40430.1) | sp. | 99% | WP_006512937.1 |
| 406 | LeptZ  | 357  | type IV secretion protein Rhs/WD40 repeat containing protein | <i>Leptolyngbya</i><br>ISBN3-Nov-94-8<br>(AMH40434.1) | sp. | 96% | WP_006512936.1 |
| 405 | LeptAA | 1395 | type IV secretion protein Rhs/WD40 repeat containing protein | <i>Leptolyngbya</i><br>ISBN3-Nov-94-8<br>(AMH40424.1) | sp. | 98% | WP_006512935.1 |

**Supplementary Table 8: Predicted stereochemistry for phormidolide and leptolyngbyalide A.**

| KR        | Predicted stereochemistry of phormidolide | Predicted stereochemistry of leptolyngbyalide | Stereochemistry assigned by Williamson <i>et al.</i> <sup>7</sup> | Suggested correct stereochemistry |
|-----------|-------------------------------------------|-----------------------------------------------|-------------------------------------------------------------------|-----------------------------------|
| Module 3  | D-OH                                      | D-OH                                          | L-OH                                                              | D-OH                              |
| Module 4  | D-OH                                      | D-OH                                          | L-OH                                                              | D-OH                              |
| Module 5  | D-OH                                      | D-OH                                          | L-OH                                                              | D-OH                              |
| Module 6  | D-OH                                      | D-OH                                          | L-OH                                                              | D-OH                              |
| Module 7  | D-OH                                      | D-OH                                          | L-OH                                                              | D-OH                              |
| Module 9  | D-OH                                      | D-OH                                          | L-OH                                                              | D-OH                              |
| Module 11 | L-OH                                      | L-OH                                          | D-OH                                                              | L-OH                              |
| Module 12 | D-OH                                      | D-OH                                          | L-OH                                                              | D-OH                              |
| Module 15 | D-OH                                      | D-OH                                          | L-OH                                                              | D-OH                              |
| Module 16 | D-OH                                      | D-OH                                          | L-OH                                                              | D-OH                              |

**Supplementary Table 9: deduced proteins encoded in the *cun* BGC and their putative functions.**

| Aq349 protein | # amino acids | Proposed function                                                                  | Closest homolog (NCBI Ref. Seq.)                   | Identity (%) | Accession number      |
|---------------|---------------|------------------------------------------------------------------------------------|----------------------------------------------------|--------------|-----------------------|
| CunA          | 195           | transcriptional activator                                                          | <i>Aquimarina megaterium</i> EL33 (WP_074405477.1) | 100          | WP_074405477.1        |
| CunB          | 3516          | PKS (ACP-DUF-PLP-KS-DH-KR-ACP-KS-DH)                                               | <i>Aquimarina megaterium</i> EL33 (WP_074405476.1) | 99           | WP_108807999.1        |
| CunC          | 589           | Aminotransferase/aminomutase                                                       | <i>Aquimarina megaterium</i> EL33 (WP_074405475.1) | 100          | WP_074405475.1        |
| CunD          | 1265          | PKS (ACP-KS <sup>0</sup> -ACP-TE)                                                  | <i>Aquimarina megaterium</i> EL33 (WP_074405474.1) | 99           | WP_108807998.1        |
| CunE          | 813           | transporter                                                                        | <i>Aquimarina megaterium</i> EL33 (WP_074405473.1) | 100          | WP_074405473.1        |
| CunF          | 295           | hypothetical protein                                                               | <i>Aquimarina megaterium</i> (WP_074405472.1)      | 100          | WP_074405472.1        |
| CunG          | 421           | oxidoreductase                                                                     | <i>Aquimarina megaterium</i> EL33 (WP_074405471.1) | 98           | WP_108807997.1        |
| CunH          | 204           | hypothetical protein                                                               | <i>Aquimarina megaterium</i> EL33 (WP_074405470.1) | 100          | WP_074405470.1        |
| CunI*         | 1482          | PKS (GNAT-ACP-KS-ECH-ECH-ECH)                                                      | <i>Aquimarina</i> sp. AU58 (WP_109851288.1)        | 93           | *                     |
| CunJ          | 4377          | PKS (ACP-KS-KR-ACP-KS-DH <sup>0</sup> -KR-cMT-ACP-KS-DH)                           | <i>Aquimarina</i> sp. AU58 (WP_109851288.1)        | 93           | WP_108809475.1        |
| CunK          | 1550          | PKS (KR-ACP-KS-DH <sup>0</sup> )                                                   | <i>Aquimarina</i> sp. AU58 (WP_109851289.1)        | 93           | WP_132066262.1        |
| CunL*         | 1373          | PKS (ECH-ECH-ECH-ACP-ACP-KS-DH)                                                    | <i>Aquimarina</i> sp. AU58 (WP_109851289.1)        | 94           | *                     |
| CunM          | 4745          | PKS (KR-ACP-KS-DH <sup>0</sup> -ECH-ECH-ECH-ACP-ACP-KS-DH <sup>0</sup> -KR-ACP-KS) | <i>Aquimarina</i> sp. AU58 (WP_109851290.1)        | 93           | WP_108807996.1        |
| CunN          | 411           | hypothetical protein                                                               | <i>Aquimarina megaterium</i> EL33 (WP_074409437.1) | 99           | WP_108807995.1        |
| CunO          | 4617          | PKS (DH-KR-ACP-KS-DH <sup>0</sup> -KR-ACP-KS-KR-ACP-KS-DH)                         | <i>Aquimarina</i> sp. AU58 (WP_109851292.1)        | 94           | WP_108807994.1        |
| CunP          | 273           | hypothetical protein                                                               | <i>Aquimarina megaterium</i> EL33 (WP_074409439.1) | 100          | WP_074409439.1        |
| CunQ          | 403           | cysteine desulfurase                                                               | <i>Aquimarina megaterium</i> EL33 (WP_082994979.1) | 100          | WP_082994979.1        |
| CunR          | 206           | methyltransferase                                                                  | <i>Aquimarina megaterium</i> EL33 (WP_074409440.1) | 100          | WP_074409440.1        |
| CunS          | 664           | aminotransferase                                                                   | <i>Aquimarina megaterium</i> EL33 (WP_025666766.1) | 99           | WP_108807993.1        |
| CunT          | 419           | HMG-CoA synthase homolog                                                           | <i>Aquimarina megaterium</i> EL33 (WP_074409442.1) | 100          | WP_074409442.1        |
| CunU          | 263           | enoyl-CoA hydratase                                                                | <i>Aquimarina megaterium</i> EL33 (WP_074409443.1) | 100          | WP_074409443.1        |
| CunV          | 450           | hypothetical protein                                                               | <i>Aquimarina megaterium</i> (WP_074409444.1) EL33 | 100          | WP_074409444.1        |
| CunW          | 316           | AT                                                                                 | <i>Aquimarina megaterium</i> EL33 (WP_074409445.1) | 100          | WP_074409445.1        |
| CunX          | 241           | hydroxyaxylglutathione hydrolase-like enzyme                                       | <i>Aquimarina megaterium</i> EL33 (WP_082994980.1) | 100          | WP_082994980.1        |
| CunY          | 86            | ACP                                                                                | <i>Aquimarina megaterium</i> EL33 (WP_074409446.1) | 100          | WP_074409446.1        |
| CunZ          | 426           | KS                                                                                 | <i>Aquimarina megaterium</i> EL33 (WP_074409447.1) | 99           | WP_108808230.1        |
| CunAa         | 396           | AT                                                                                 | <i>Aquimarina megaterium</i> EL33 (WP_074409448.1) | 99           | <b>WP_108807992.1</b> |

\* putatively split genes at contig borders. No accession numbers available.

**Supplementary Dataset 1: Maximum likelihood phylogenetic tree from a MUSCLE alignment of 655 KS sequences of all 54 characterized *trans*-AT PKS BGCs (as of December 2016).** Legend: aMe:  $\alpha$ -methyl, bOH:  $\beta$ -hydroxyl, aOH:  $\alpha$ -hydroxyl, 0: non elongating KS: hactal: hemiacetal, DB: double bond, shDB: shifted double bond, red: completely reduced, vinylogous: vinylogous chain branching, Oxa: oxazole, Thia: thiazole, eDB: *E*-configured DB, zDB: *Z*-configured DB, D\_OH: D-configured hydroxyl group, L\_OH: L-configured hydroxyl group, rearrangement: oxygen insertion. Branch nomenclature: polyketide name\_protein name\_number of KS on the respective protein\_number of KS in the PKS\_substrate specificity. Numbers on tree nodes indicate bootstrap values.

## References

- 1 Blin K., M. M., Kottmann R., Lee S. Y., and Weber T. The antiSMASH database, a comprehensive database of microbial secondary metabolite biosynthetic gene clusters. *Nucleic Acids Res.*, 555-559 (2016).
- 2 Helfrich, E. J. & Piel, J. Biosynthesis of polyketides by *trans*-AT polyketide synthases. *Nat. Prod. Rep.* **33**, 231-316 (2016).
- 3 Piel, J. Biosynthesis of polyketides by *trans*-AT polyketide synthases. *Nat. Prod. Rep.* **27**, 996-1047 (2010).
- 4 O'Brien, R. V., Davis, R. W., Khosla, C. & Hillenmeyer, M. E. Computational identification and analysis of orphan assembly-line polyketide synthases. *J. Antibiot.* **67**, 89-97 (2014).
- 5 Piel, J. Biosynthesis of polyketides by *trans*-AT polyketide synthases. *Nat. Prod. Rep.* **27**, 996-1047 (2010).
- 6 Bertin, M. J. *et al.* The phormidolide biosynthetic gene cluster: A *trans*-AT PKS pathway encoding a toxic macrocyclic polyketide. *ChemBioChem* **17**, 164-173 (2016).
- 7 Williamson, R. T., Boulanger, A., Vulpanovici, A., Roberts, M. A. & Gerwick, W. H. Structure and absolute stereochemistry of phormidolide, a new toxic metabolite from the marine cyanobacterium *Phormidium* sp. *J. Org. Chem.* **67**, 7927-7936 (2002).
- 8 Blin, K., Medema, M. H., Kottmann, R., Lee, S. Y. & Weber, T. The antiSMASH database, a comprehensive database of microbial secondary metabolite biosynthetic gene clusters. *Nucleic Acids Res.* **45**, 555-559 (2017).
- 9 Helfrich, E. J. N. *et al.* Bipartite interactions, antibiotic production and biosynthetic potential of the *Arabidopsis* leaf microbiome. *Nature Microbiology* **3**, 909-919, (2018).
- 10 Ng, B. G., Han, J. W., Lee, D. W., Choi, G. J. & Kim, B. S. The chejuenolide biosynthetic gene cluster harboring an iterative *trans*-AT PKS system in *Hahella chejuensis* strain MB-1084. *J. Antibiot.* **71**, 495-505, (2018).
- 11 Ueoka, R. *et al.* Genome-based identification of a plant-associated marine bacterium as a rich natural product source. *Angew. Chem. Int. Ed.* **57**, 14519-14523, (2018).
- 12 Fu, C. Z. *et al.* Solving the puzzle of one-carbon loss in ripostatin biosynthesis. *Angew. Chem. Int. Ed.* **56**, 2192-2197, (2017).
- 13 Kjaerulff, L. *et al.* Pyxipyrrolones: Structure elucidation and biosynthesis of cytotoxic myxobacterial metabolites. *Angew. Chem. Int. Ed.* **56**, 9614-9618, (2017).
- 14 Paulus, C. *et al.* New alpiniamides from *Streptomyces* sp. IB2014/011-12 assembled by an unusual hybrid non-ribosomal peptide synthetase *trans*-AT polyketide synthase enzyme. *Front. Microbiol.* **9**, (2018).
- 15 Suroto, D. A., Kitani, S., Arai, M., Ikeda, H. & Nihira, T. Characterization of the biosynthetic gene cluster for cryptic phthoxazolin A in *Streptomyces avermitilis*. *PLoS One* **13**, (2018).
- 16 Florez, L. V. *et al.* An antifungal polyketide associated with horizontally acquired genes supports symbiont-mediated defense in *Lagria villosa* beetles. *Nat. Commun.* **9**, (2018).
- 17 Kust, A. *et al.* Discovery of a pederin family compound in a nonsymbiotic bloom-forming Cyanobacterium. *ACS Chem. Biol.* **13**, 1123-1129, (2018).
