# Supplementary material
Source: PubMed Central journal article supplement (PMC6642696)
Supplement: EMS83251-supplement-Supplementary_note.pdf [file EMS83251-supplement-Supplementary_note.pdf]

## Supplementary Note

# Automated structure prediction of *trans*-acyltransferase polyketide synthase products

Eric J. N. Helfrich,<sup>1\*</sup> Reiko Ueoka,<sup>1\*</sup> Alon Dolev,<sup>1\*</sup> Michael Rust,<sup>1</sup> Roy A. Meoded,<sup>1</sup> Agneya Bhushan,<sup>1</sup> Gianmaria Califano,<sup>2,3</sup> Rodrigo Costa,<sup>2,4</sup> Muriel Gugger,<sup>5</sup> Christoph Steinbeck,<sup>3,6</sup> Pablo Moreno,<sup>6#</sup> and Jörn Piel<sup>1#</sup>

<sup>1</sup>Institute of Microbiology, Eidgenössische Technische Hochschule (ETH) Zürich, Vladimir-Prelog Weg 4, 8093 Zurich, Switzerland.

<sup>2</sup>Centre of Marine Sciences, University of Algarve, Gambelas Campus, Building 7, 8005-139 Faro, Portugal.

<sup>3</sup>Institute for Inorganic and Analytical Chemistry, Friedrich-Schiller-Universität Jena, Lessingstrasse 8, 07743 Jena, Germany.

<sup>4</sup>Institute for Bioengineering and Biosciences (IBB), Instituto Superior Técnico, Universidade de Lisboa, 1049-001 Lisbon, Portugal.

<sup>5</sup>Institut Pasteur, Collection des Cyanobactéries, 28 Rue du Docteur Roux, 75724 Paris CEDEX15, France.

<sup>6</sup>European Bioinformatics Institute (EBI), Wellcome Trust Genome Campus, Hinxton, Cambridge, CB10 1SD, United Kingdom.

#Correspondence should be addressed to JP (jpiel@ethz.ch) and PM (pmoreno@ebi.ac.uk).

\*Authors contributed equally to this work

GS-MB-P-15 #2412\_RT: 21.04\_AV: 1\_NL: 7.49E6  
T: FTMS + p ESI Full ms [166.70-2500.00]

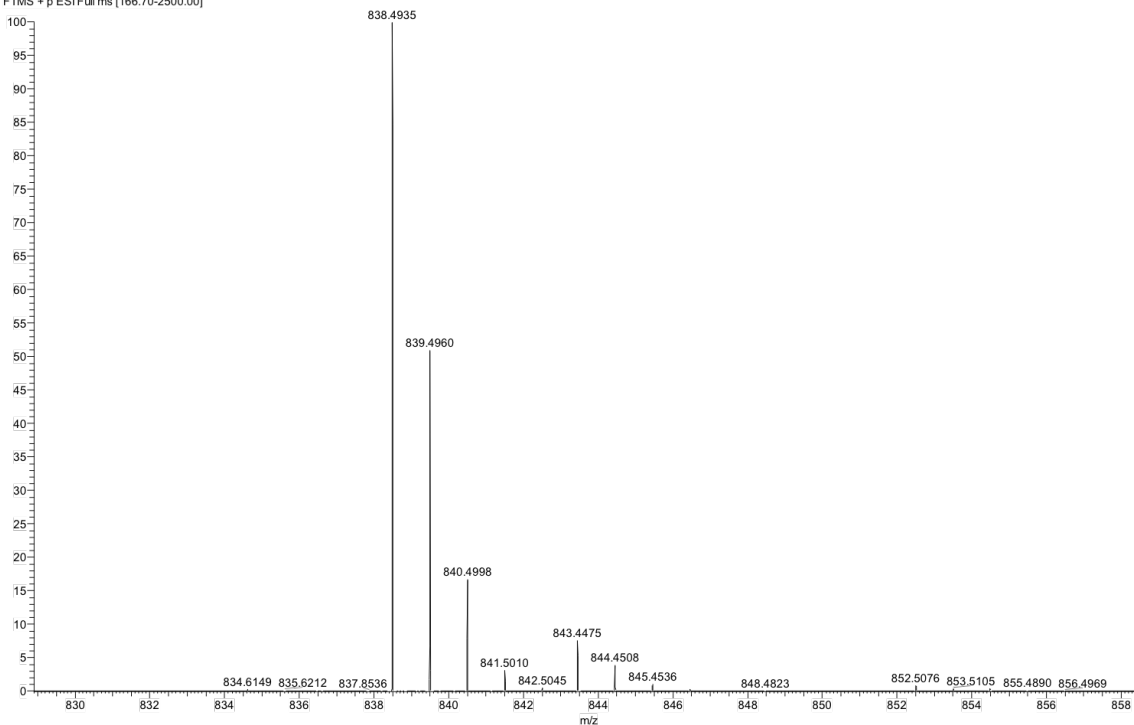

Supplementary Note Figure 1: HR-ESI-MS spectrum of tartrolon D (4) from *Gynuella sunshinyii* ( $m/z$  838.4935  $[M+NH_4]^+$ ,  $m/z$  843.4475  $[M+Na]^+$ ) ( $n = 1$ ).

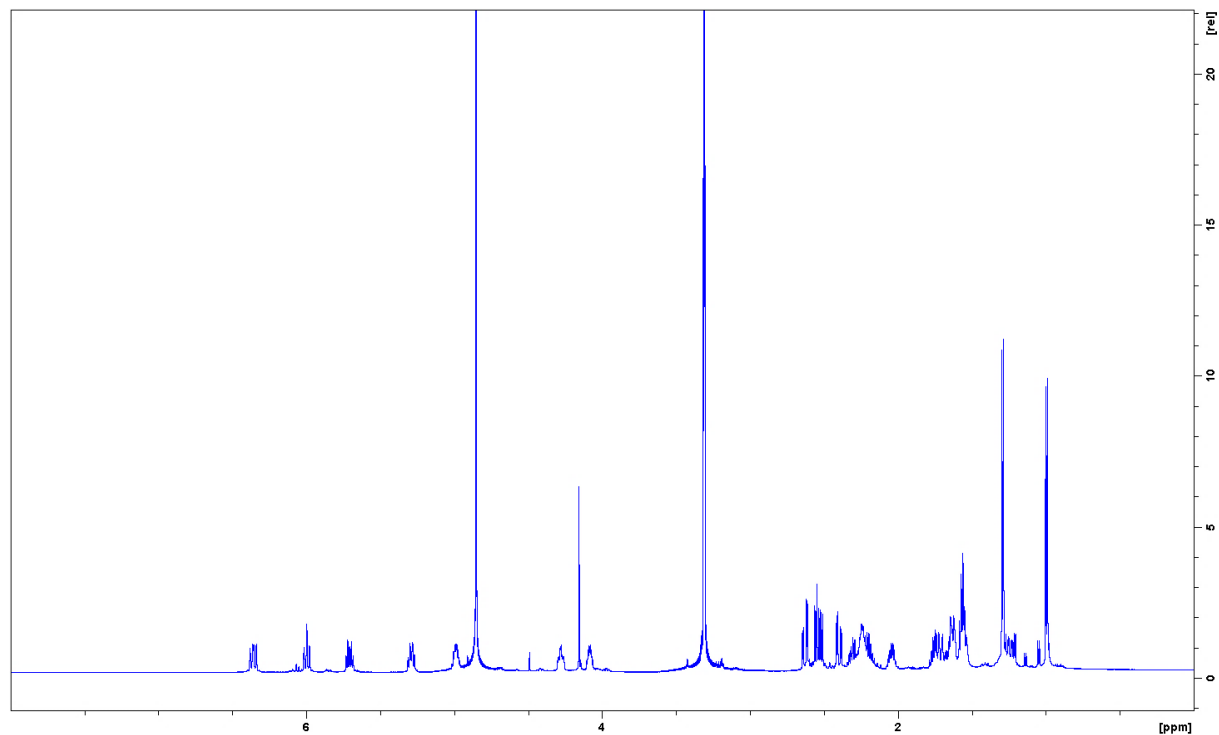

Supplementary Note Figure 2:  $^1H$  NMR spectrum of tartrolon D (4) from *Gynuella sunshinyii* in  $CD_3OD$  ( $n = 1$ ).

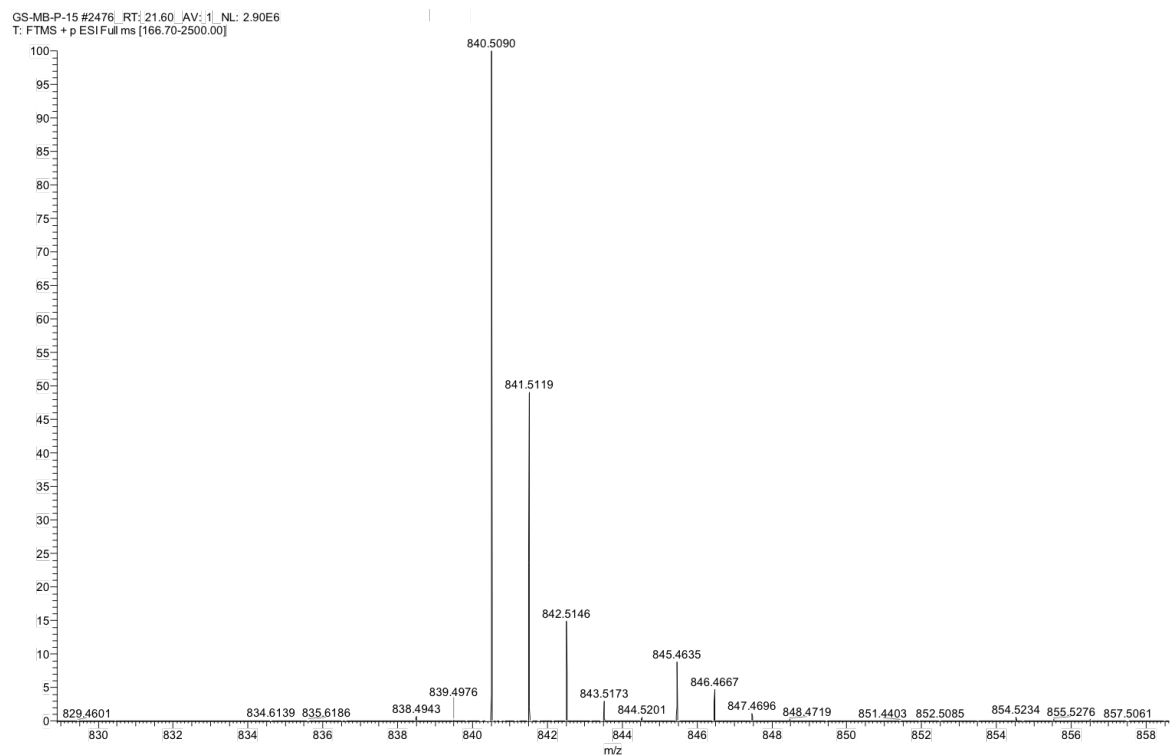

**Supplementary Note Figure 3: HR-ESI-MS spectrum of tartrolon F (5) from *Gynuella sunshinyii* ( $m/z$  840.5090  $[M+NH_4]^+$ ,  $m/z$  845.4635  $[M+Na]^+$ ) ( $n = 1$ ).**

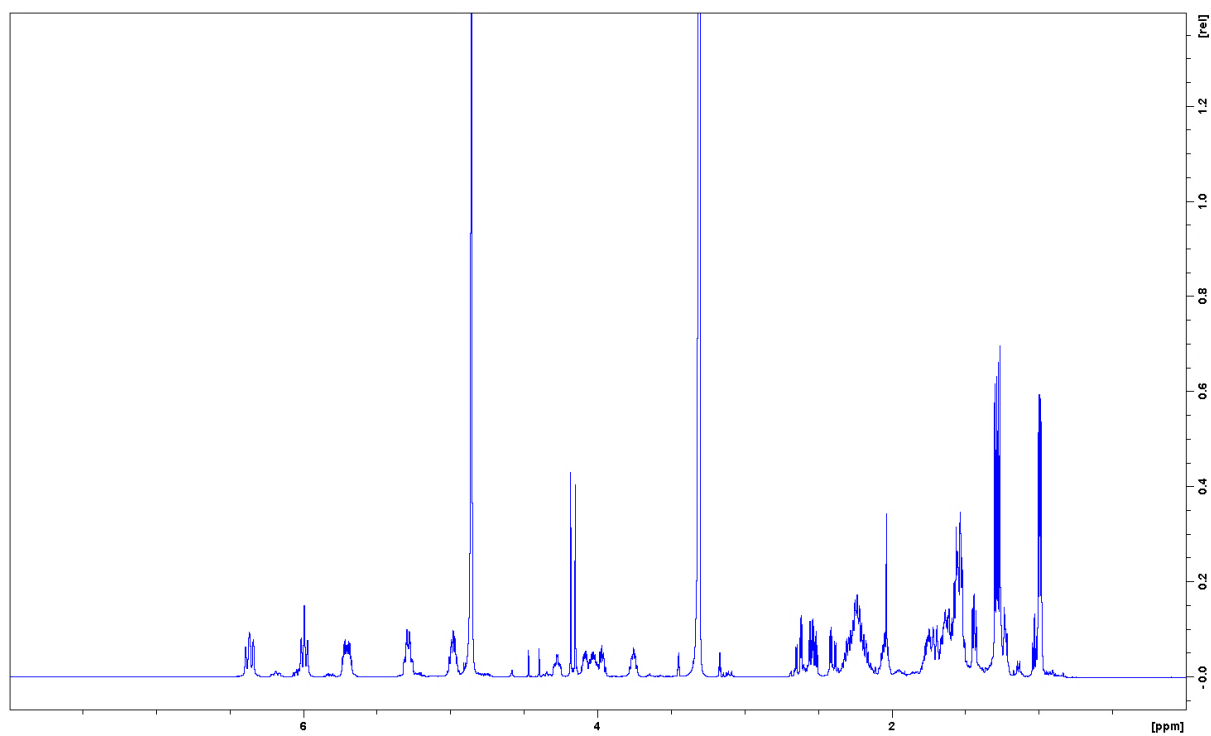

**Supplementary Note Figure 4:  $^1H$  NMR spectrum of tartrolon F (5) from *Gynuella sunshinyii* in  $CD_3OD$  ( $n = 1$ ).**

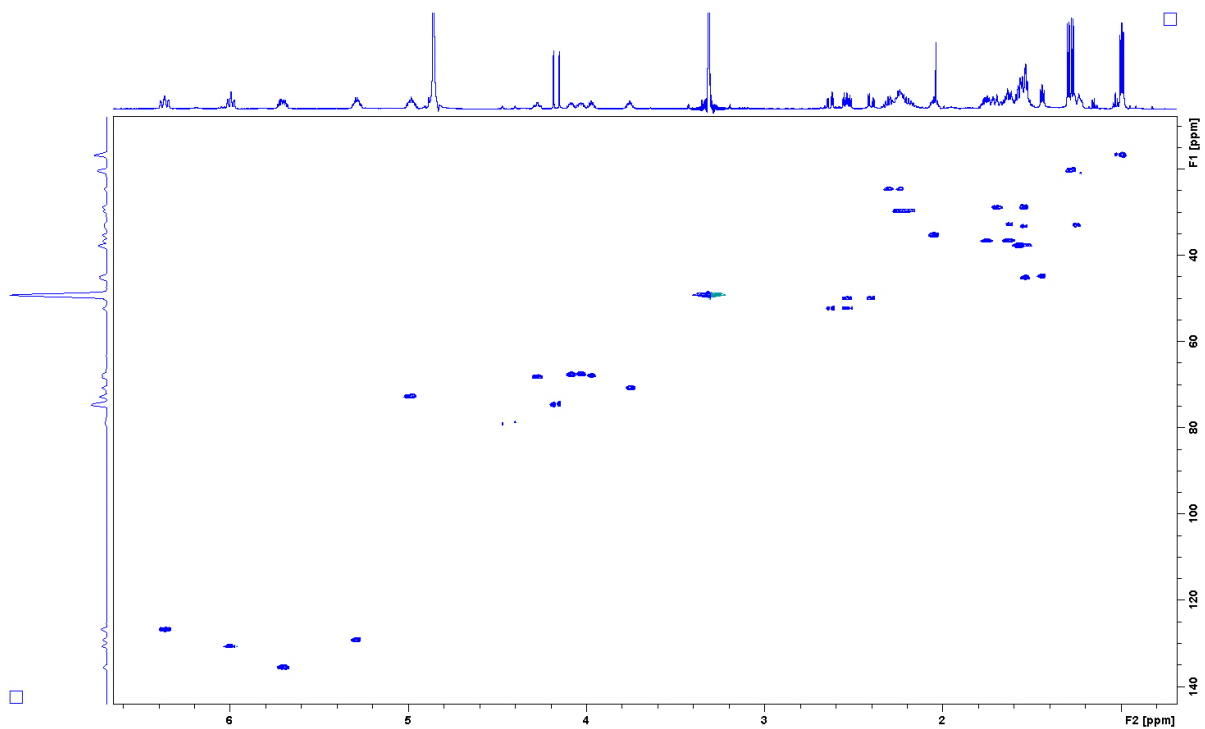

Supplementary Note Figure 5: HSQC spectrum of tartrolon F (5) from *Gynuella sunshinyii* in CD<sub>3</sub>OD (n = 1).

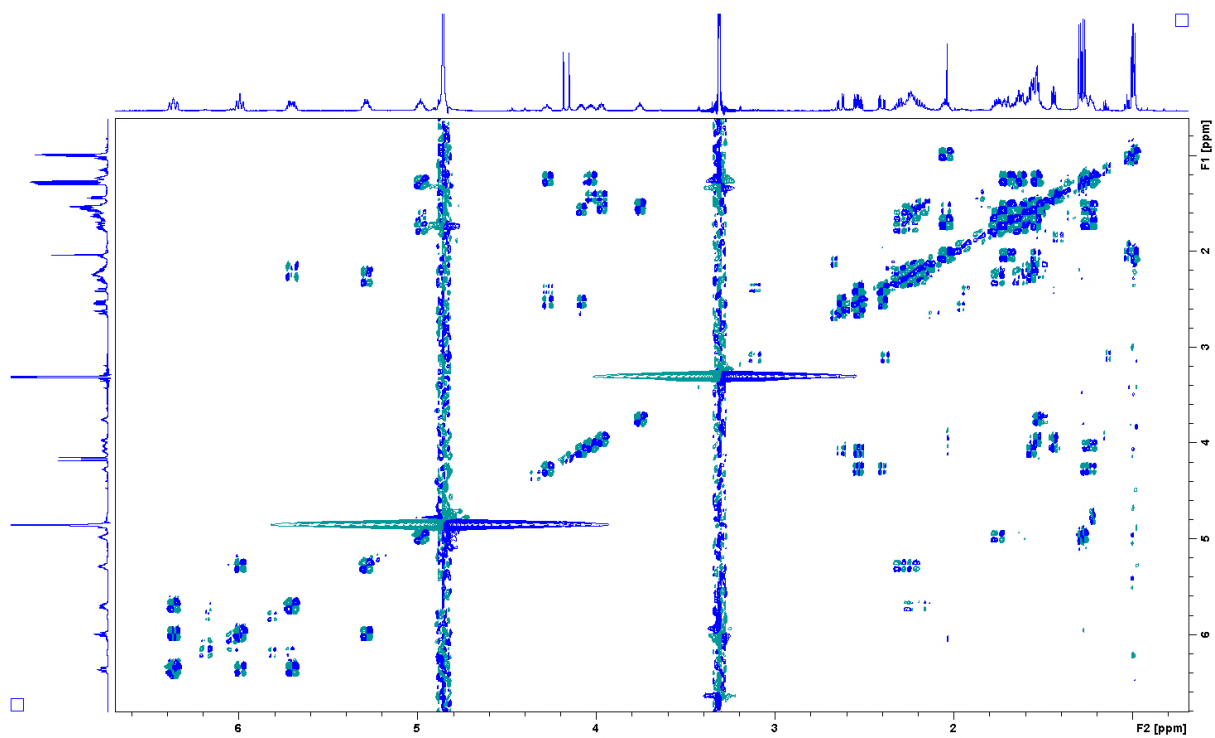

Supplementary Note Figure 6: COSY spectrum of tartrolon F (5) from *Gynuella sunshinyii* in CD<sub>3</sub>OD (n = 1).

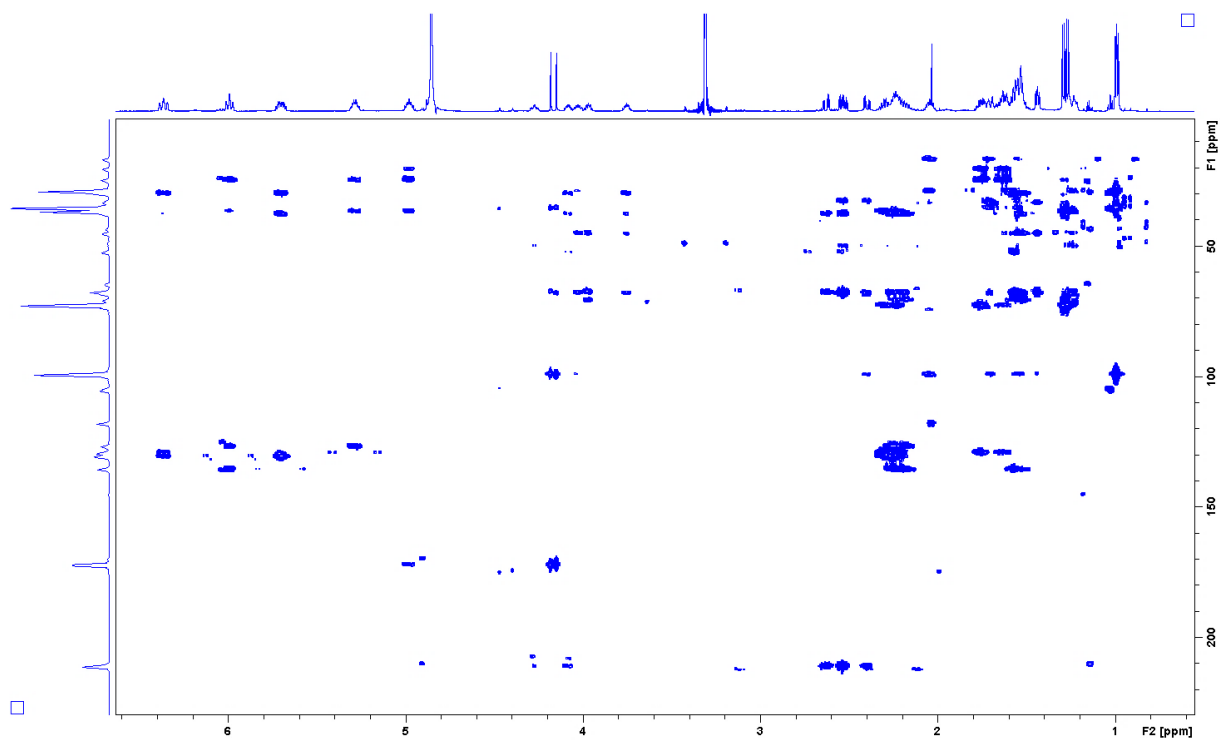

Supplementary Note Figure 7: HMBC spectrum of tartrolon F (5) from *Gynuella sunshinyii* in CD<sub>3</sub>OD (n = 1).

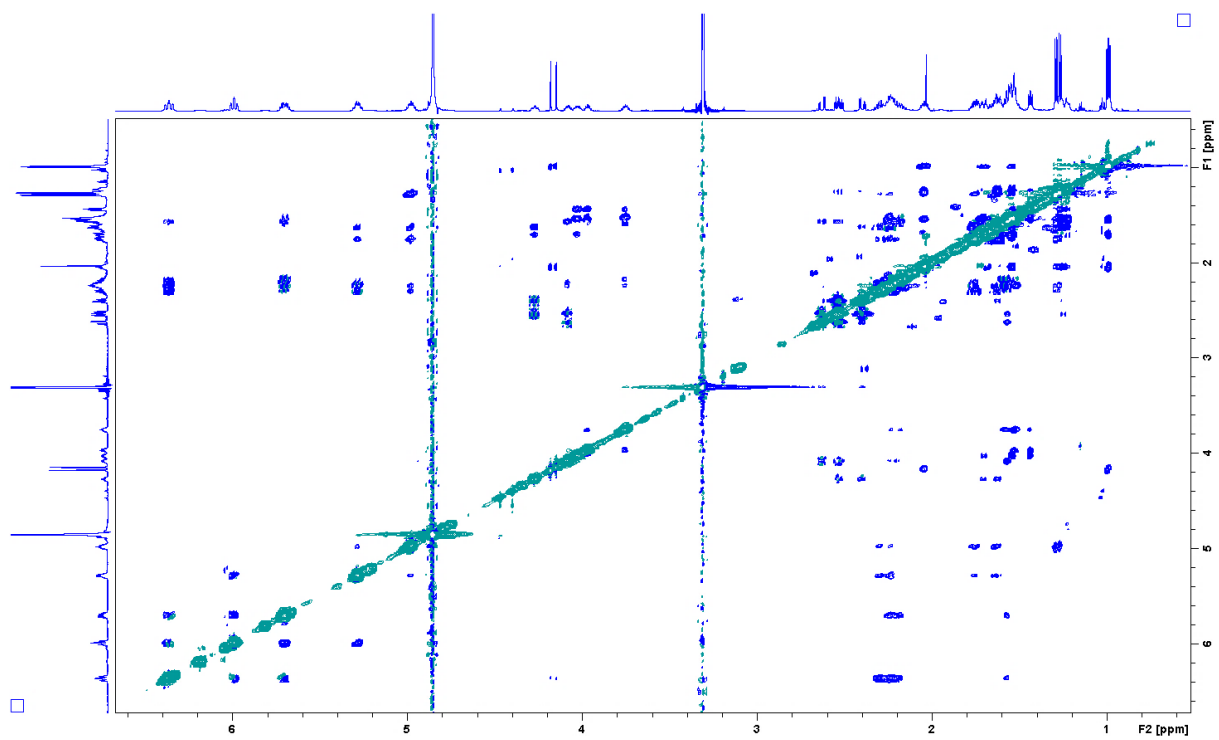

Supplementary Note Figure 8: NOESY spectrum of tartrolon F (5) from *Gynuella sunshinyii* in CD<sub>3</sub>OD (n = 1).

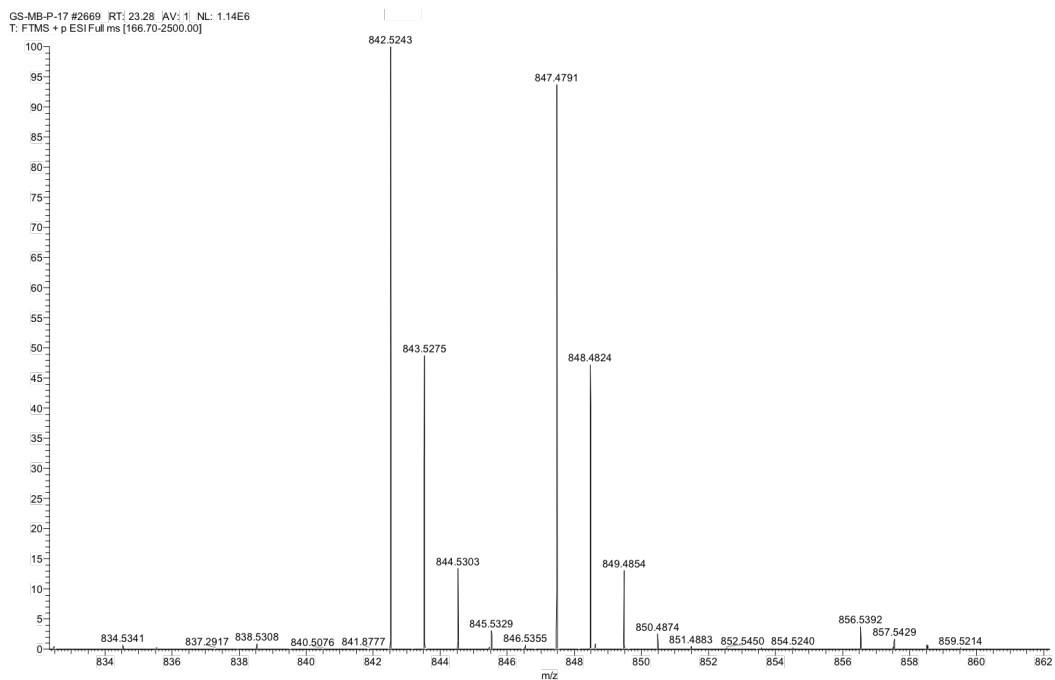

**Supplementary Note Figure 9: HR-ESI-MS spectrum of tartrolon G (6) from *Gynuella sunshinyii* ( $m/z$  842.5243  $[M+NH_4]^+$ ,  $m/z$  847.4791  $[M+Na]^+$ ) ( $n = 1$ ).**

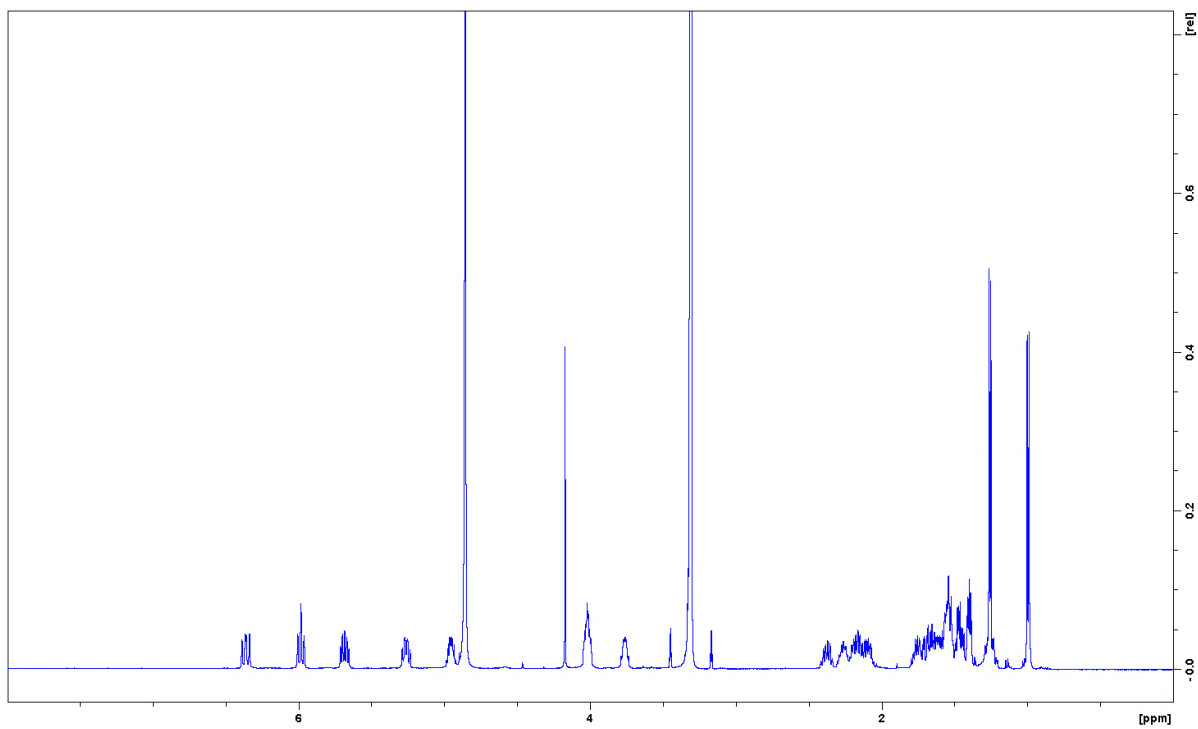

**Supplementary Note Figure 10:  $^1H$  NMR spectrum of tartrolon G (6) from *Gynuella sunshinyii* in  $CD_3OD$  ( $n = 1$ ).**

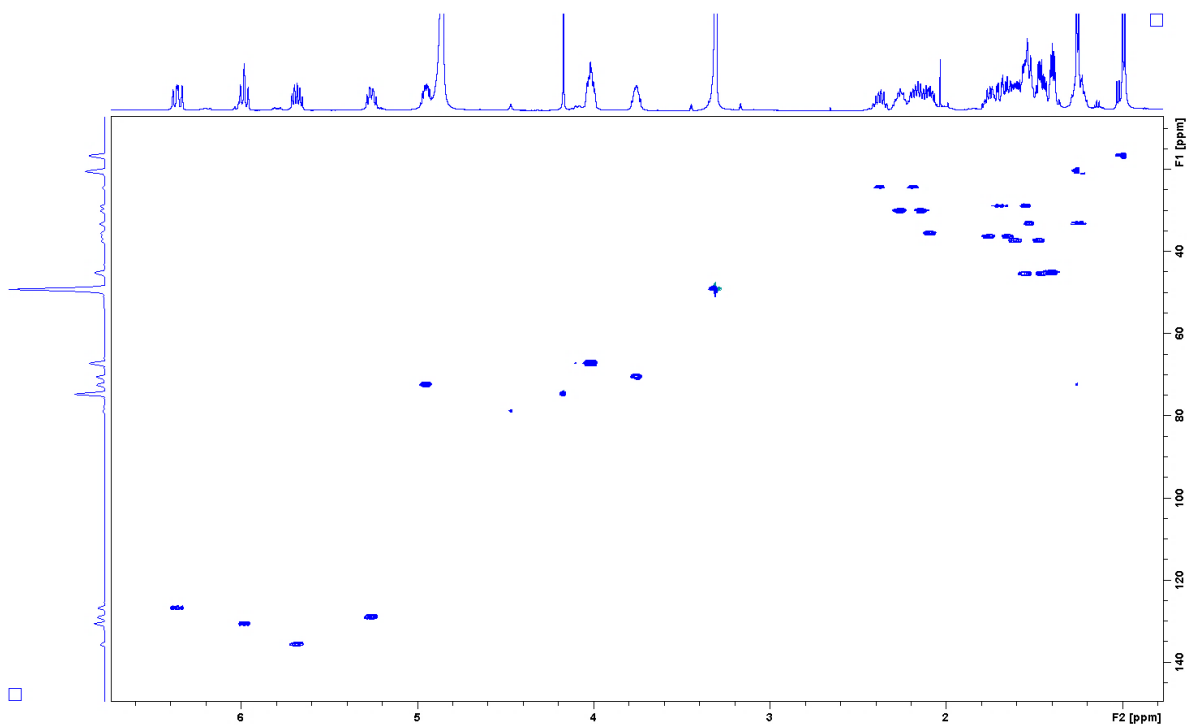

Supplementary Note Figure 11: HSQC spectrum of tartrolon G (6) from *Gynuella sunshinyii* in CD<sub>3</sub>OD (n = 1).

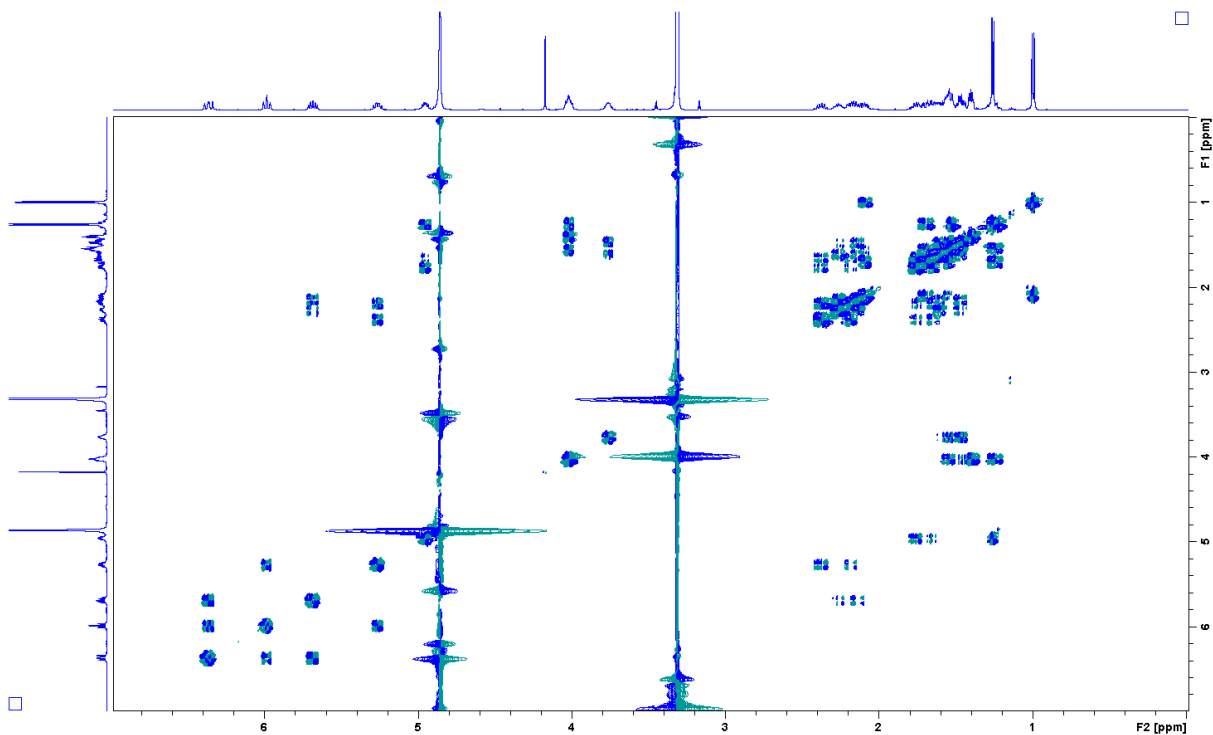

Supplementary Note Figure 12: COSY spectrum of tartrolon G (6) from *Gynuella sunshinyii* in CD<sub>3</sub>OD (n = 1).

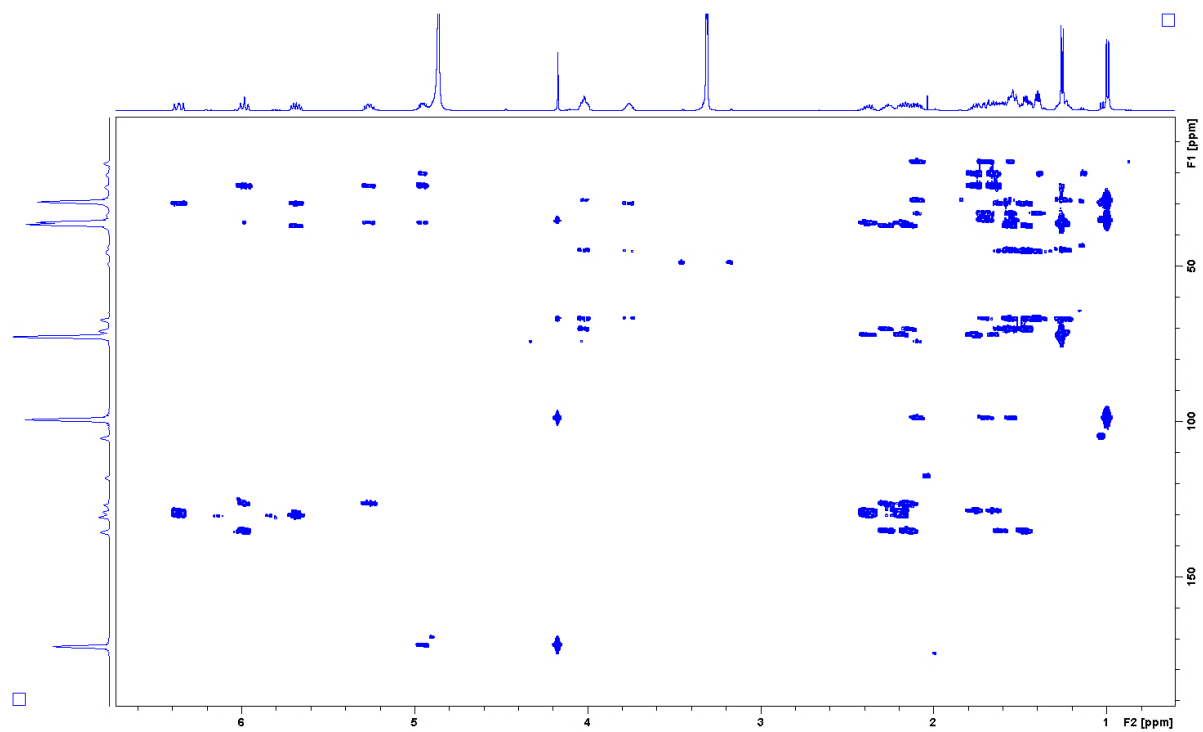

Supplementary Note Figure 13: HMBC spectrum of tartrolon G (6) from *Gynuella sunshinyii* in CD<sub>3</sub>OD (n = 1).

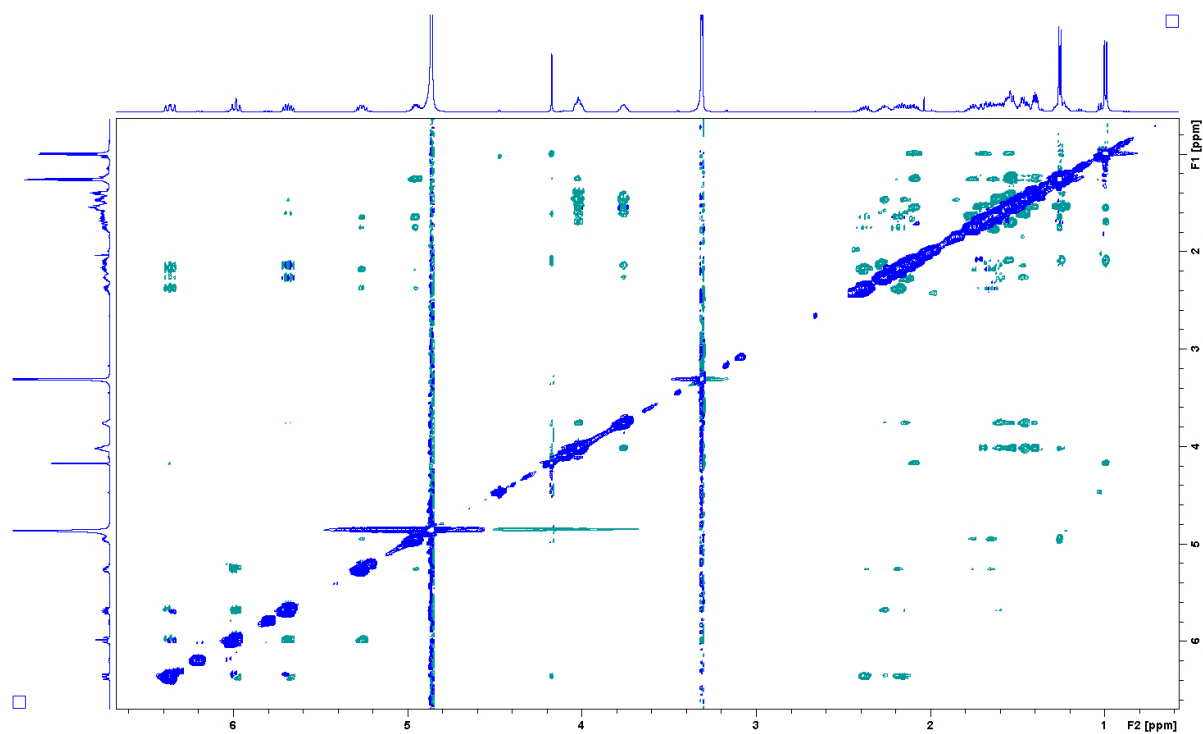

Supplementary Note Figure 14: NOESY spectrum of tartrolon G (6) from *Gynuella sunshinyii* in CD<sub>3</sub>OD (n = 1).



GS-MB-2L-EIOAc-MSMS #6004 RT: 23.31 AV: 1 NL: 3.59E4  
F: FTMS + p ESI d Full ms2 847.48@hcd30.00 [59.00-885.00]

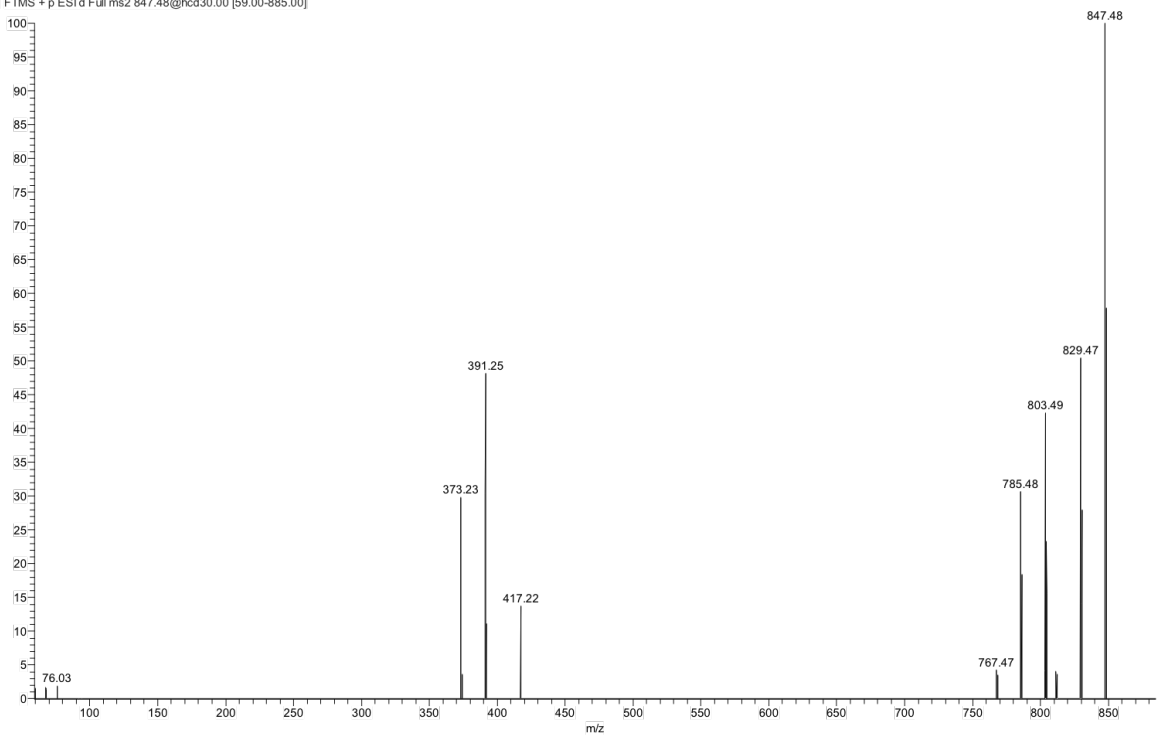

Supplementary Note Figure 15: ESI-MS<sup>2</sup> spectrum of tartrolon G (6) from *Gynuella sunshinyi* (n = 1).

**A**

PCC7375-7-1 #5756 RT: 50.23 AV: 1 NL: 1.21E6  
T: FTMS + p ESI Full ms [200.00-2000.00]

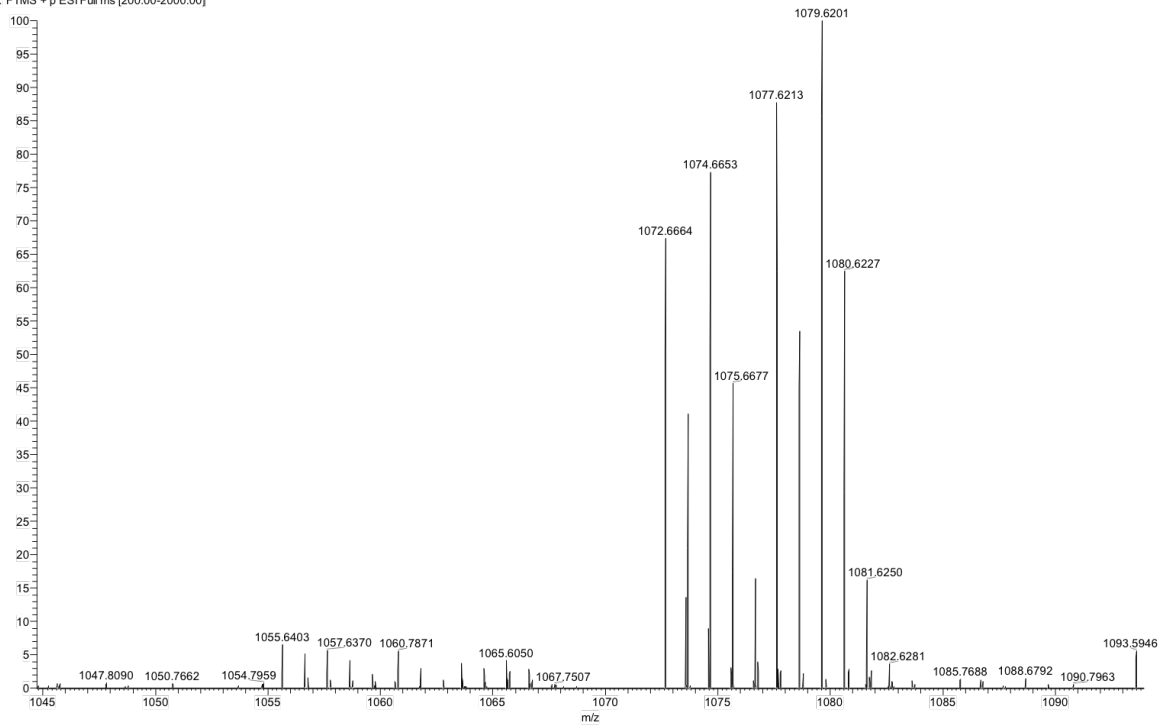**B**

PCC7375-7-1 #5487 RT: 47.88 AV: 1 NL: 1.59E6  
T: FTMS + p ESI Full ms [200.00-2000.00]

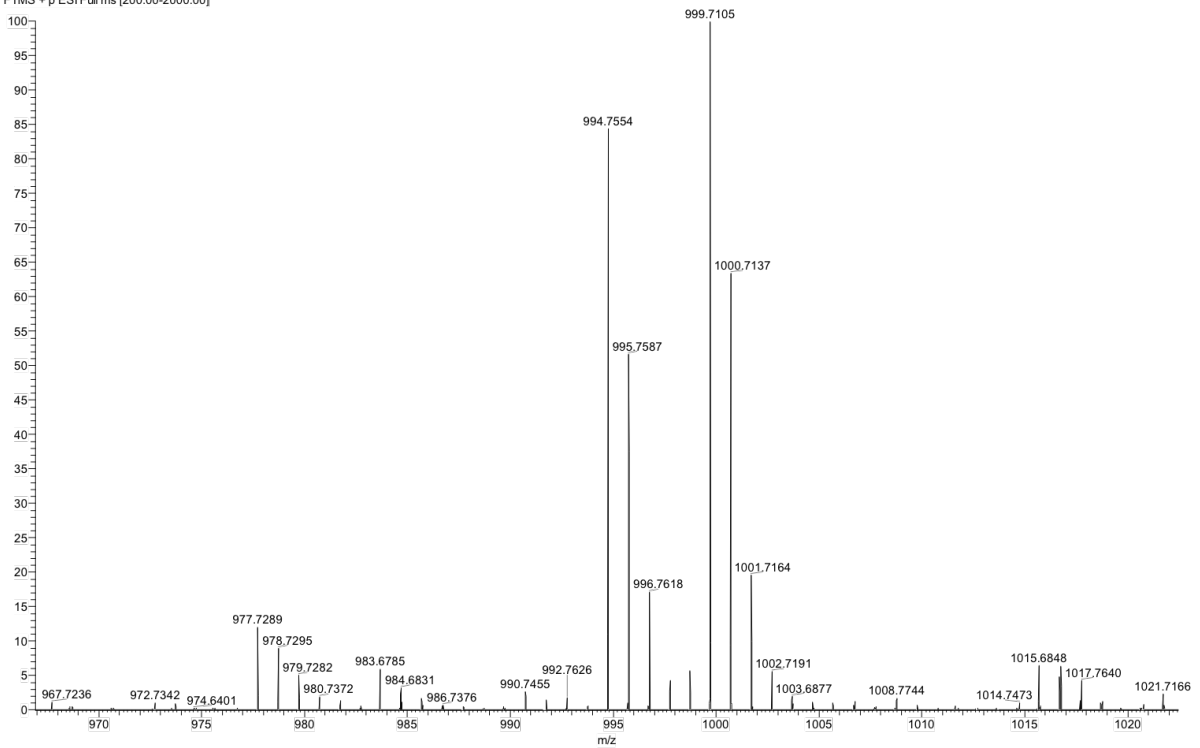

**C**PCC7375-7-1 #5158 RT: 45.01 AV: 1 NL: 2.27E6  
T: FTMS → p ESI Full ms [200.00-2000.00]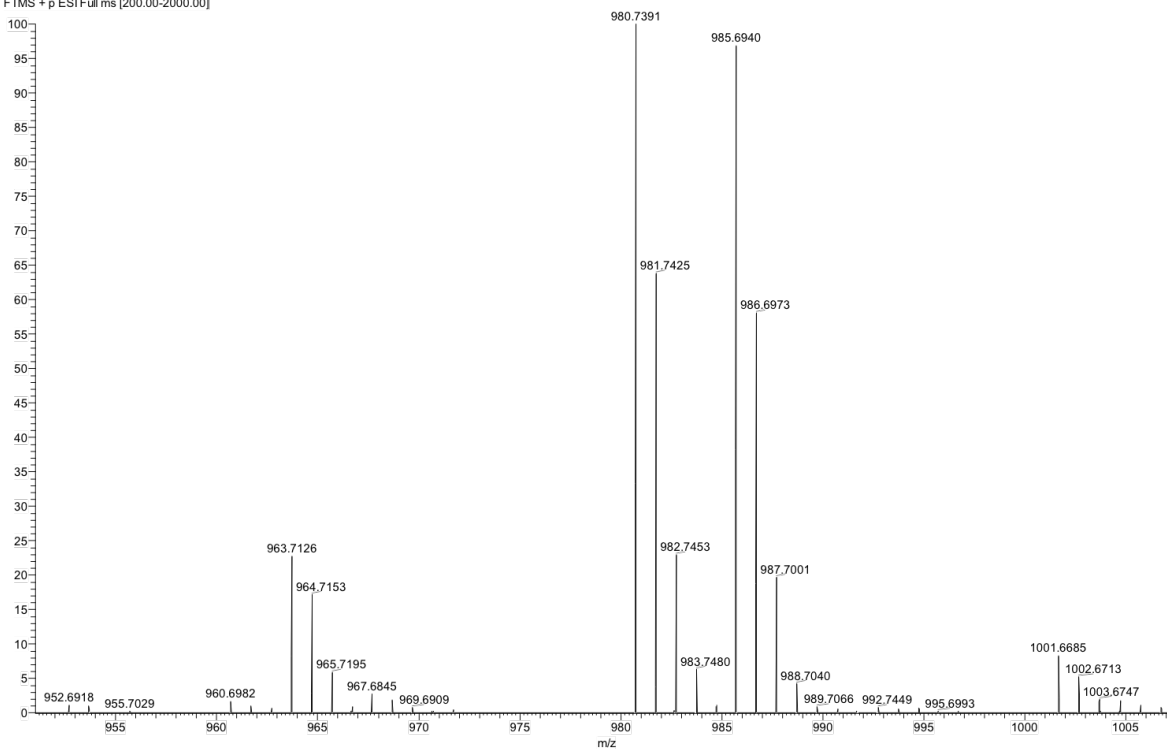

**Supplementary Note Figure 16: HR-ESI-MS spectra of 10-12.** A: leptolyngbyalide A (**10**) ( $m/z$  1055.6403, 1057.6370  $[M+H]^+$ ,  $m/z$  1072.6664, 1074.6653  $[M+NH_4]^+$ ,  $m/z$  1077.6213, 1.79.6201  $[M+Na]^+$ ), B: leptolyngbyalide B (**11**) ( $m/z$  977.7289  $[M+H]^+$ ,  $m/z$  994.7554  $[M+NH_4]^+$ ,  $m/z$  999.7105  $[M+Na]^+$ ) and C: leptolyngbyalide C (**12**) ( $m/z$  963.7126  $[M+H]^+$ ,  $m/z$  980.7391  $[M+NH_4]^+$ ,  $m/z$  985.6940  $[M+Na]^+$ ) from *Leptolyngbya* sp. PCC 7375 ( $n = 1$ ).

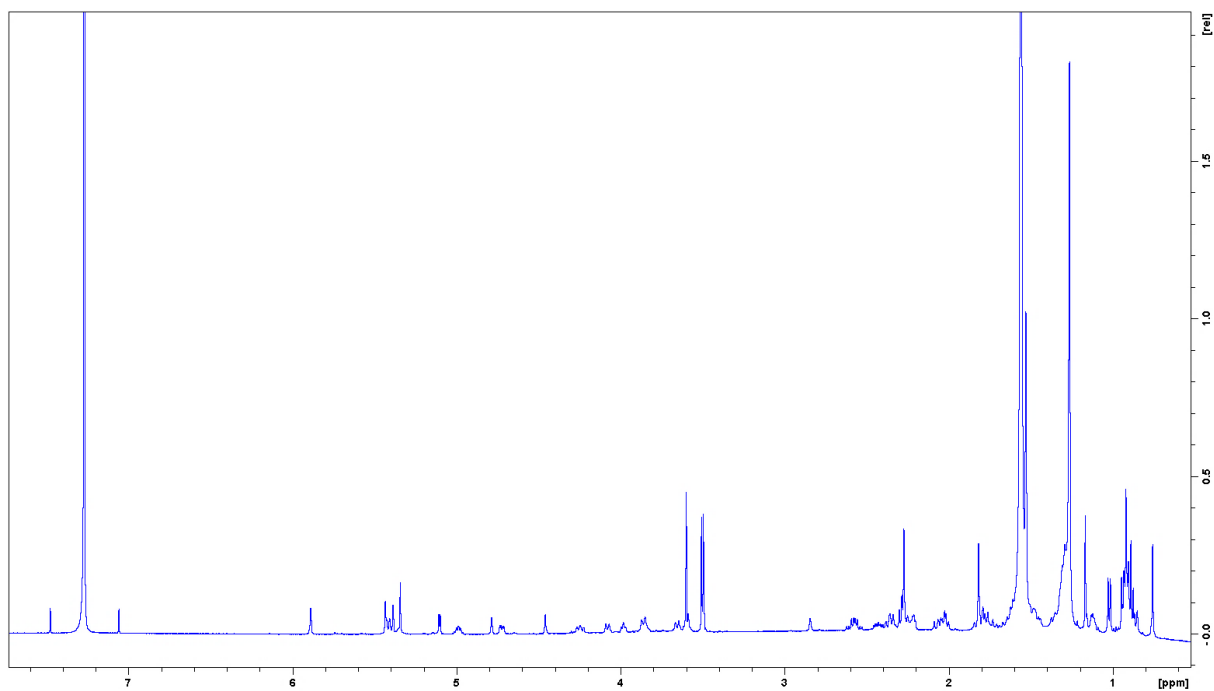

Supplementary Note Figure 17:  $^1\text{H}$  NMR spectrum of leptolyngbyalide A (10) from *Leptolyngbya* sp. PCC 7375 in  $\text{CDCl}_3$  ( $n = 1$ ).

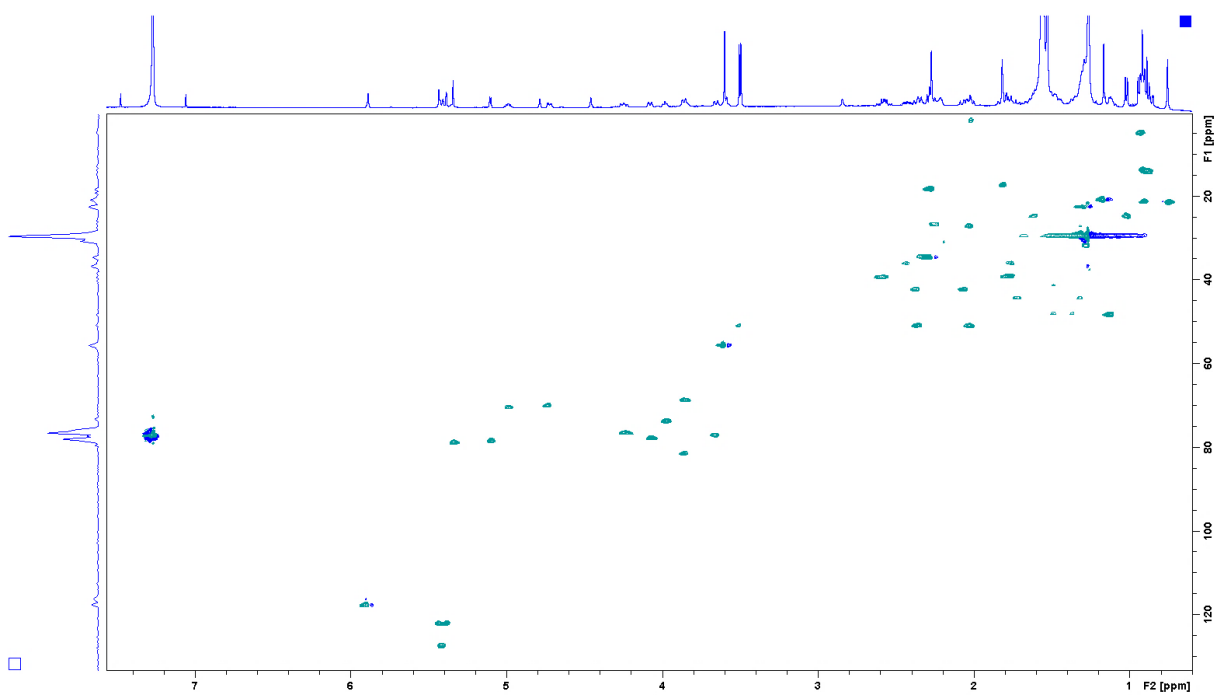

Supplementary Note Figure 18: HSQC spectrum of leptolyngbyalide A (10) from *Leptolyngbya* sp. PCC 7375 in  $\text{CDCl}_3$  ( $n = 1$ ).

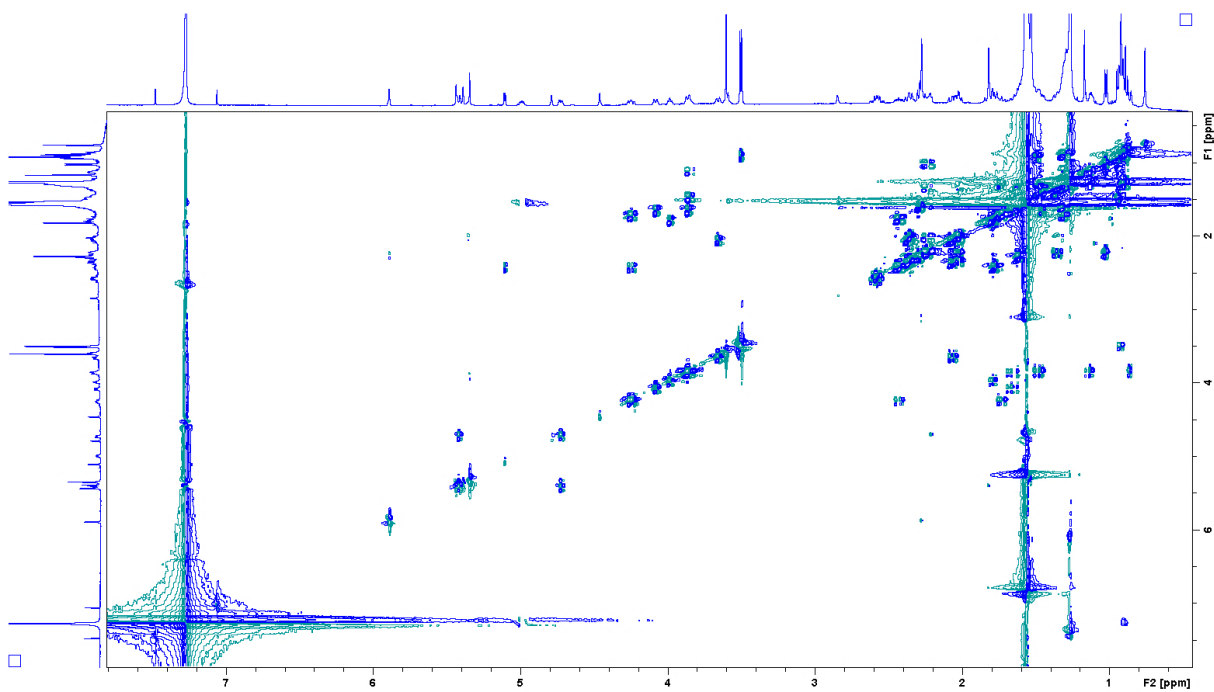

Supplementary Note Figure 19: COSY spectrum of leptolyngbyalide A (10) from *Leptolyngbya* sp. PCC 7375 in CDCl<sub>3</sub> (n = 1).

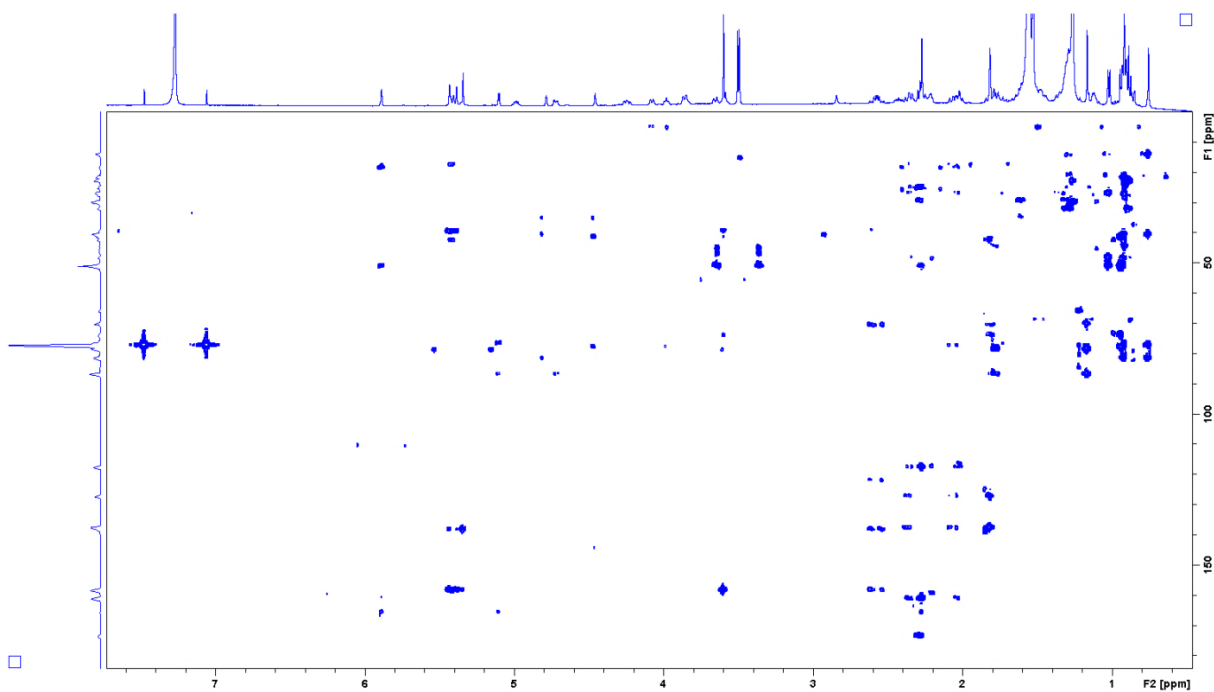

Supplementary Note Figure 20: HMBC spectrum of leptolyngbyalide A (10) from *Leptolyngbya* sp. PCC 7375 in CDCl<sub>3</sub> (n = 1).

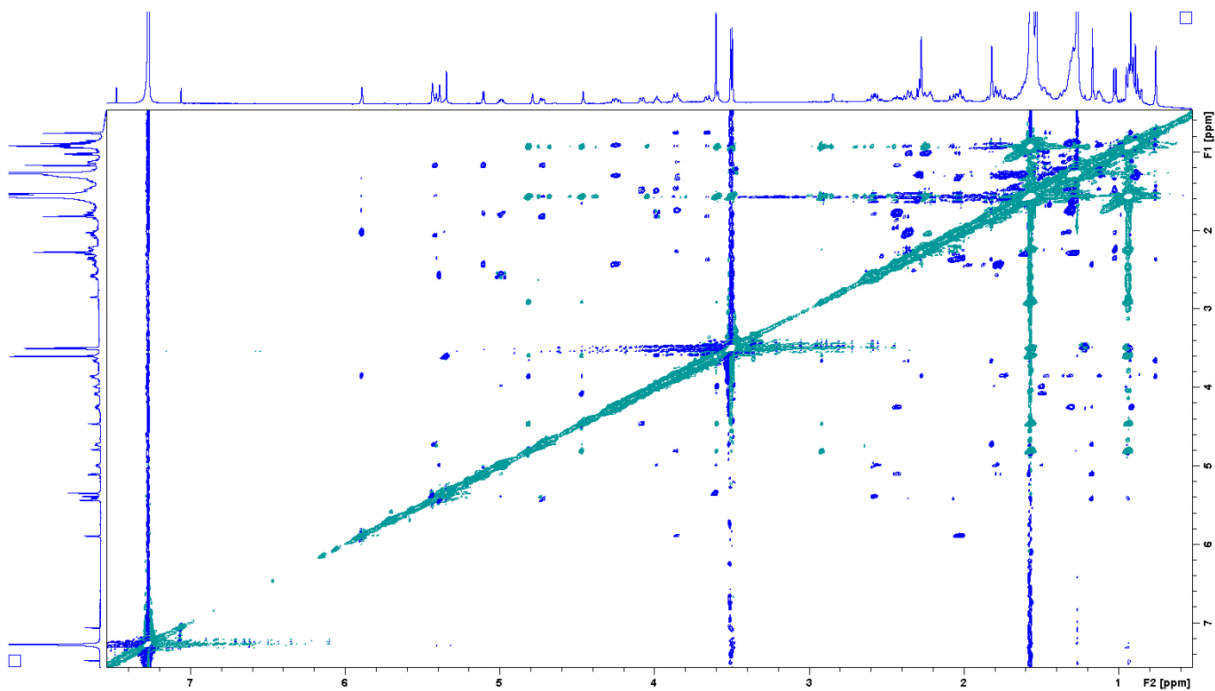

Supplementary Note Figure 21: NOESY spectrum of leptolyngbyalide A (10) from *Leptolyngbya* sp. PCC 7375 in CDCl<sub>3</sub> (n = 1).

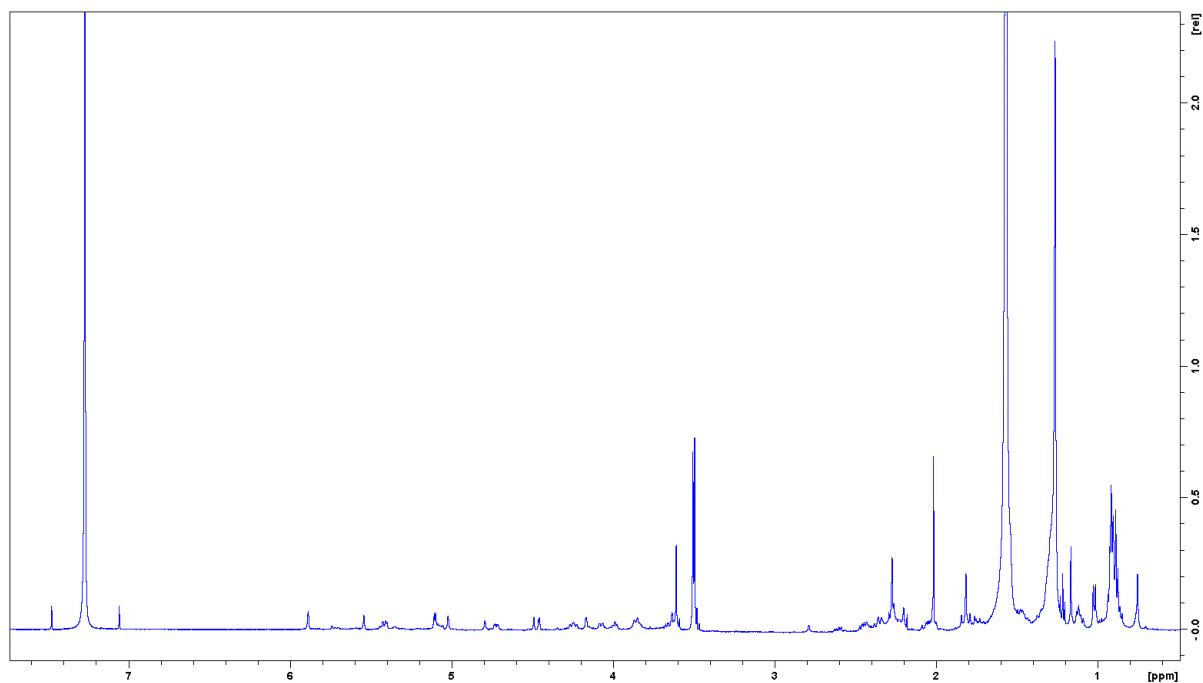

Supplementary Note Figure 22: <sup>1</sup>H NMR spectrum of leptolyngbyalide B (11) from *Leptolyngbya* sp. PCC 7375 in CDCl<sub>3</sub> (n = 1).

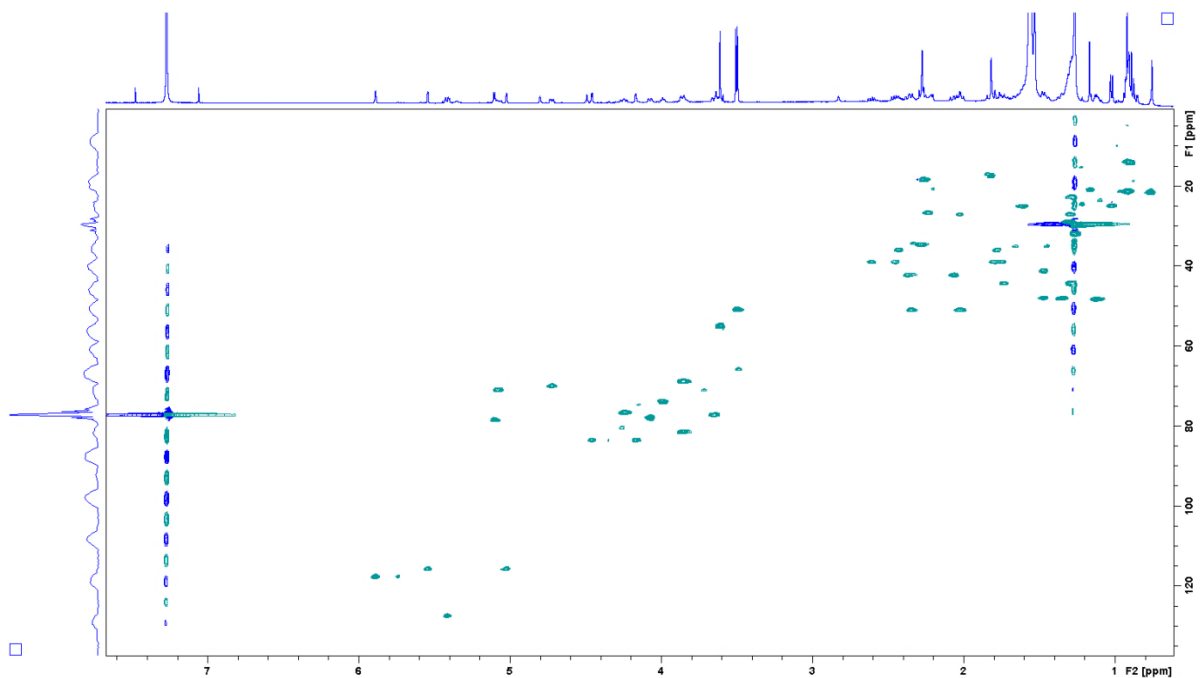

Supplementary Note Figure 23: HSQC spectrum of leptolyngbyalide B (11) from *Leptolyngbya* sp. PCC 7375 in CDCl<sub>3</sub> (n = 1).

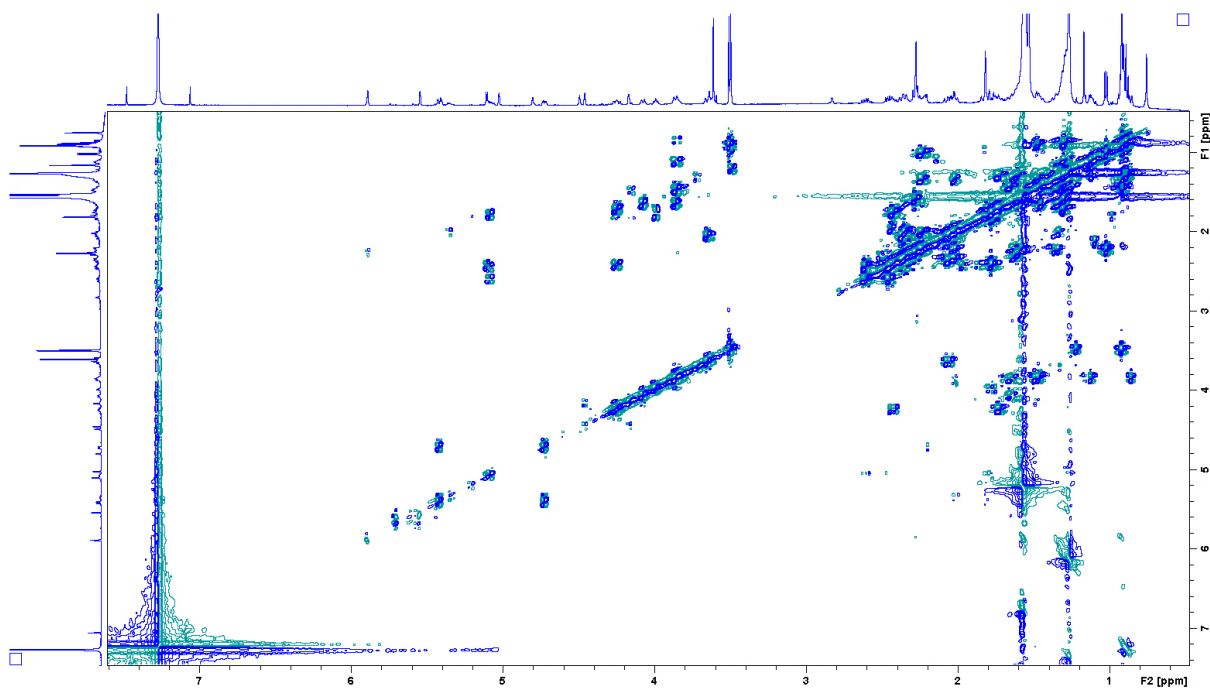

Supplementary Note Figure 24: COSY spectrum of leptolyngbyalide B (11) from *Leptolyngbya* sp. PCC 7375 in CDCl<sub>3</sub> (n = 1).

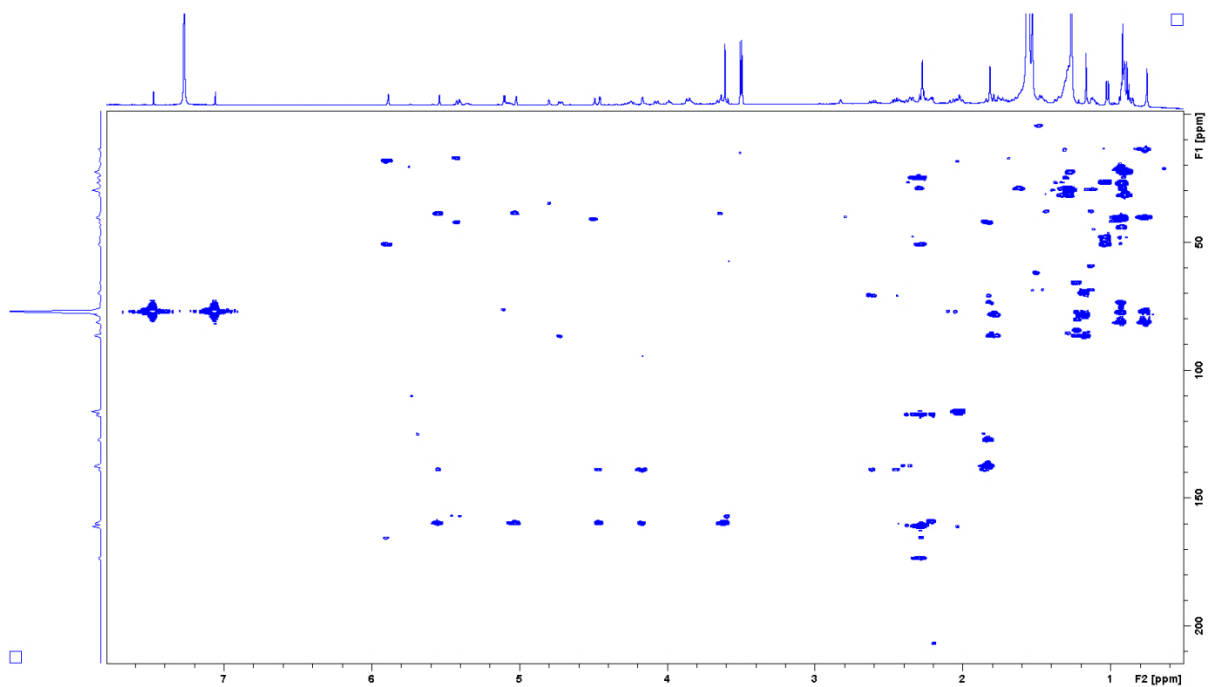

Supplementary Note Figure 25: HMBC spectrum of leptolyngbyalide B (11) from *Leptolyngbya* sp. PCC 7375 in CDCl<sub>3</sub> (n = 1).

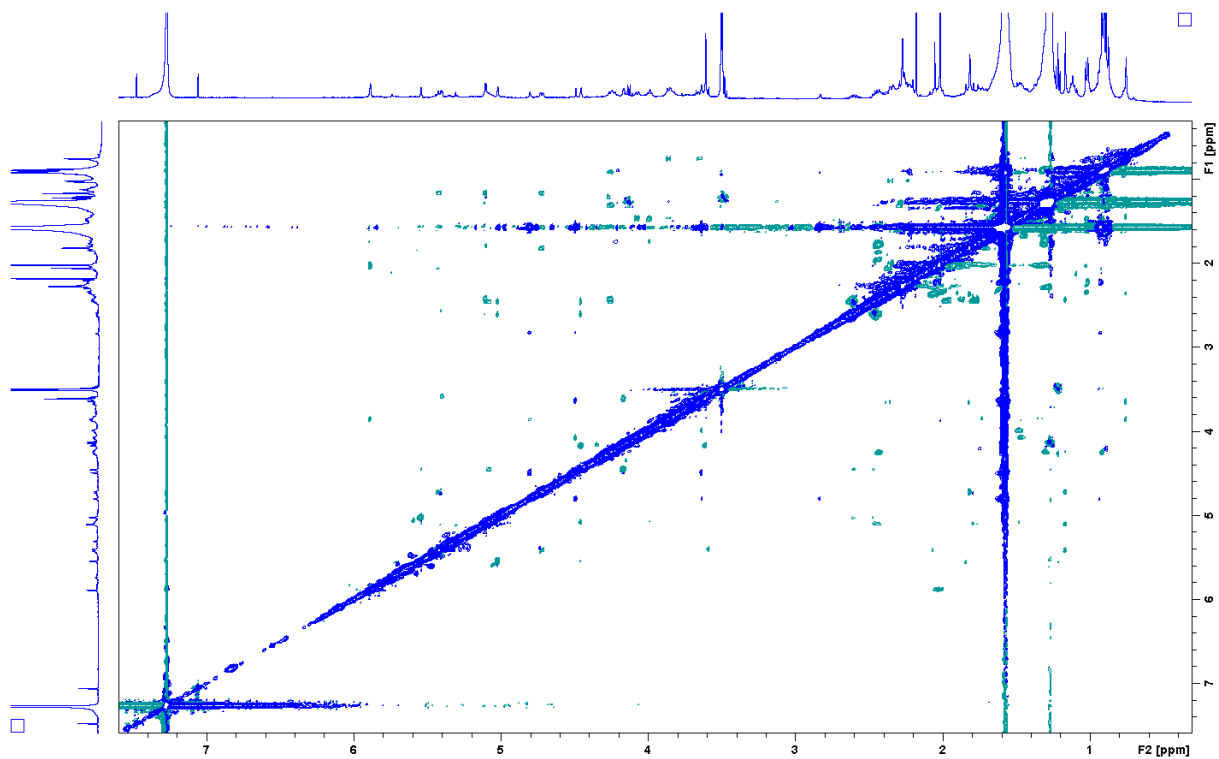

Supplementary Note Figure 26: NOESY spectrum of leptolyngbyalide B (11) from *Leptolyngbya* sp. PCC 7375 in CDCl<sub>3</sub> (n = 1).



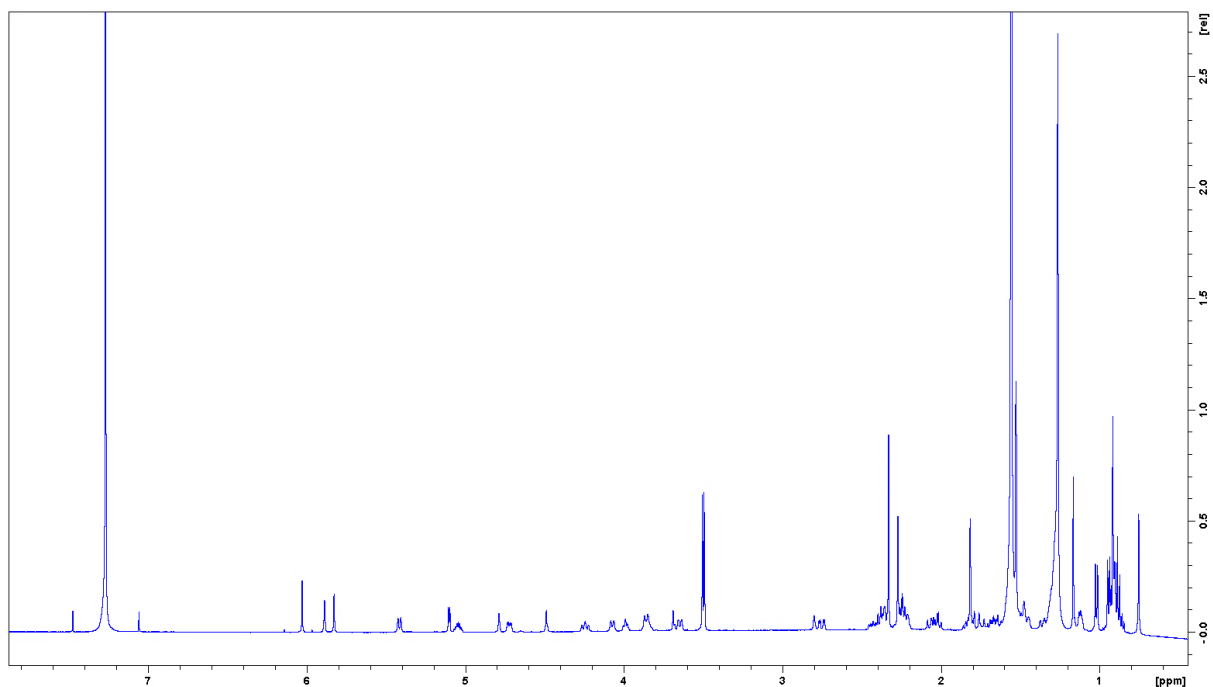

Supplementary Note Figure 27:  $^1\text{H}$  NMR spectrum of leptolyngbyalide C (12) from *Leptolyngbya* sp. PCC 7375 in  $\text{CDCl}_3$  ( $n = 1$ ).

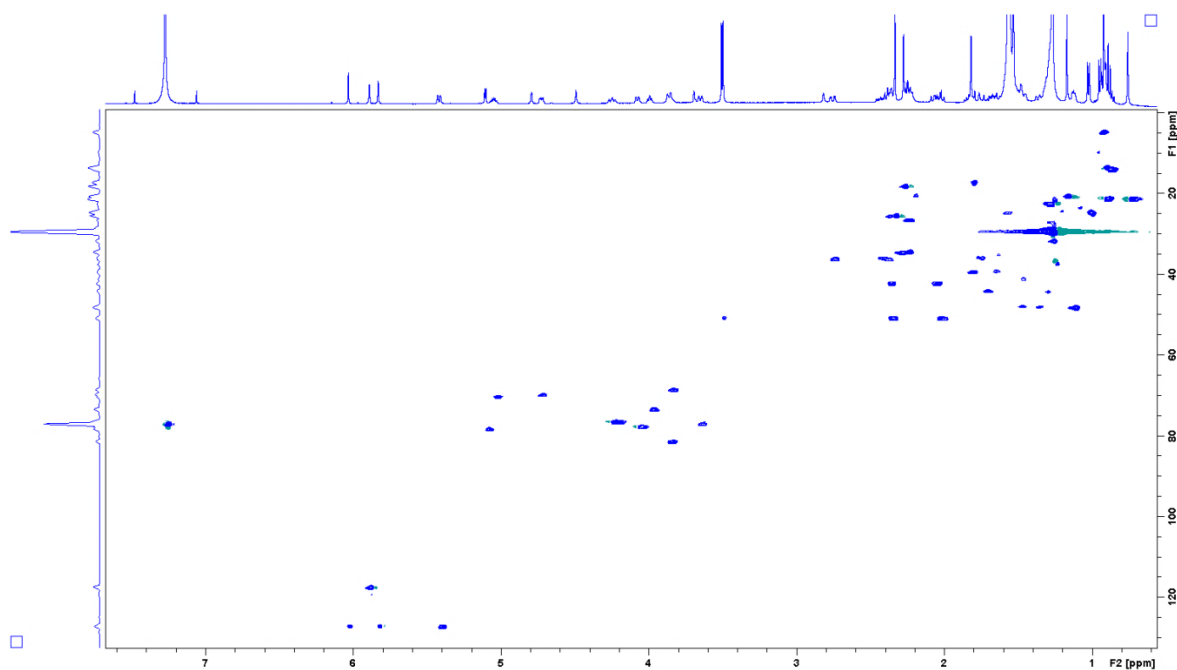

Supplementary Note Figure 28: HSQC spectrum of leptolyngbyalide C (12) from *Leptolyngbya* sp. PCC 7375 in  $\text{CDCl}_3$  ( $n = 1$ ).

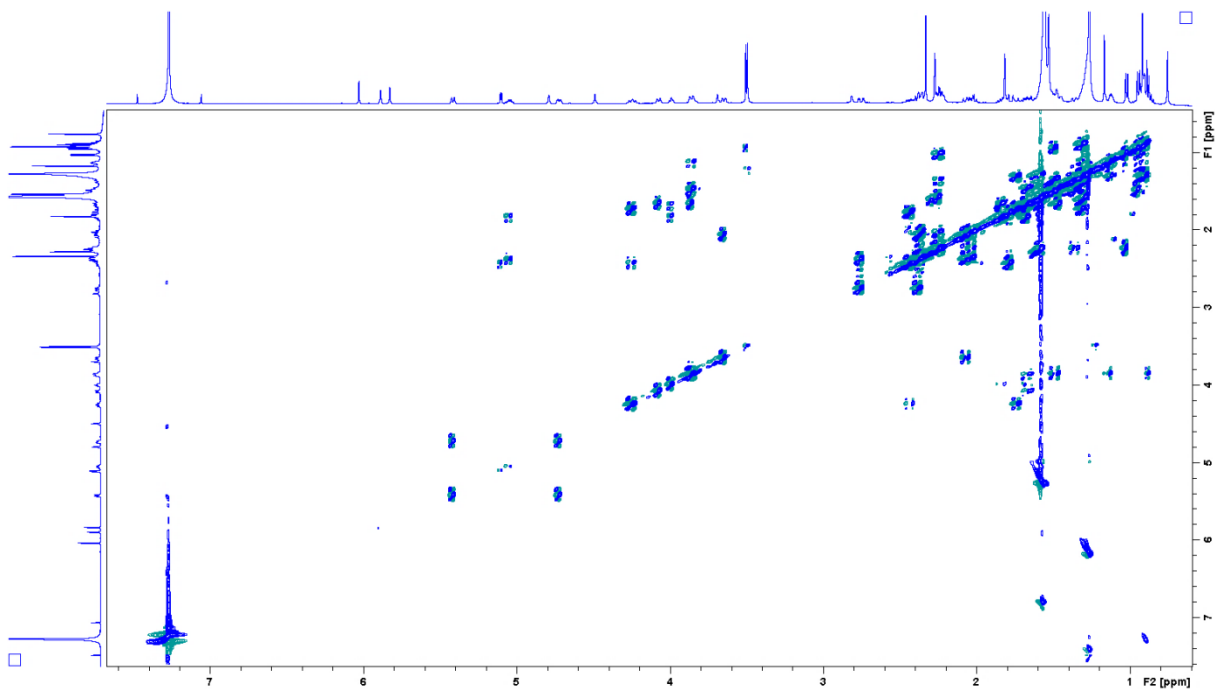

Supplementary Note Figure 29: COSY spectrum of leptolyngbyalide C (12) from *Leptolyngbya* sp. PCC 7375 in CDCl<sub>3</sub> (n = 1).

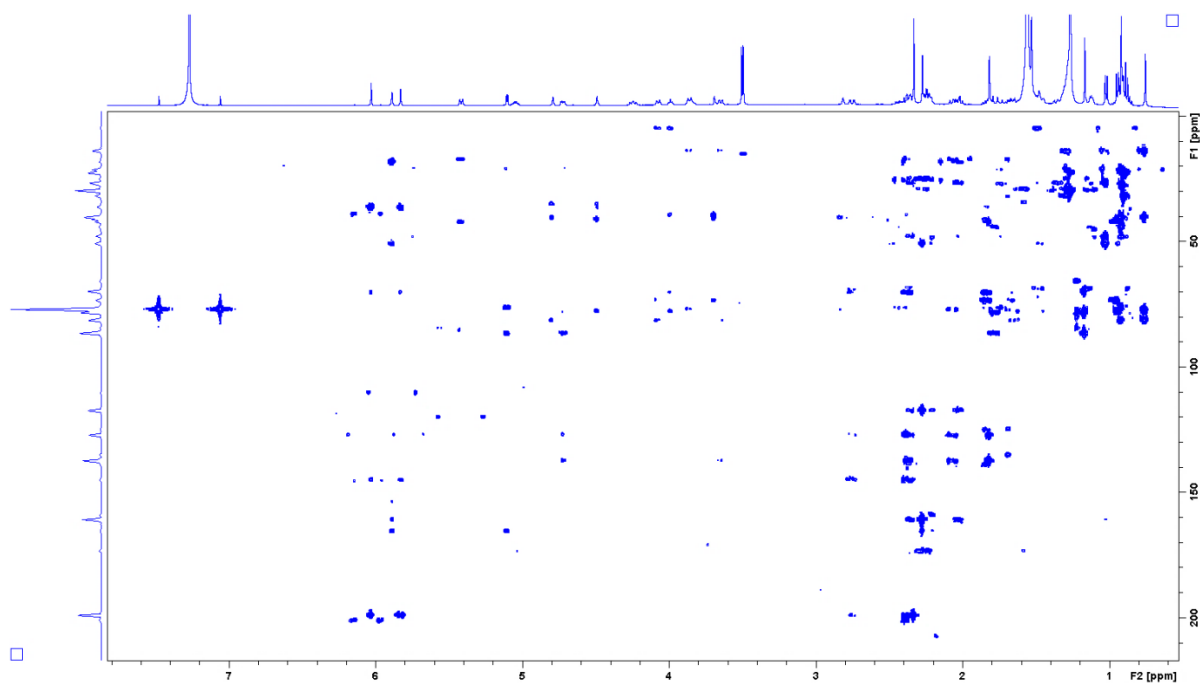

Supplementary Note Figure 30: HMBC spectrum of leptolyngbyalide C (12) from *Leptolyngbya* sp. PCC 7375 in CDCl<sub>3</sub> (n = 1).

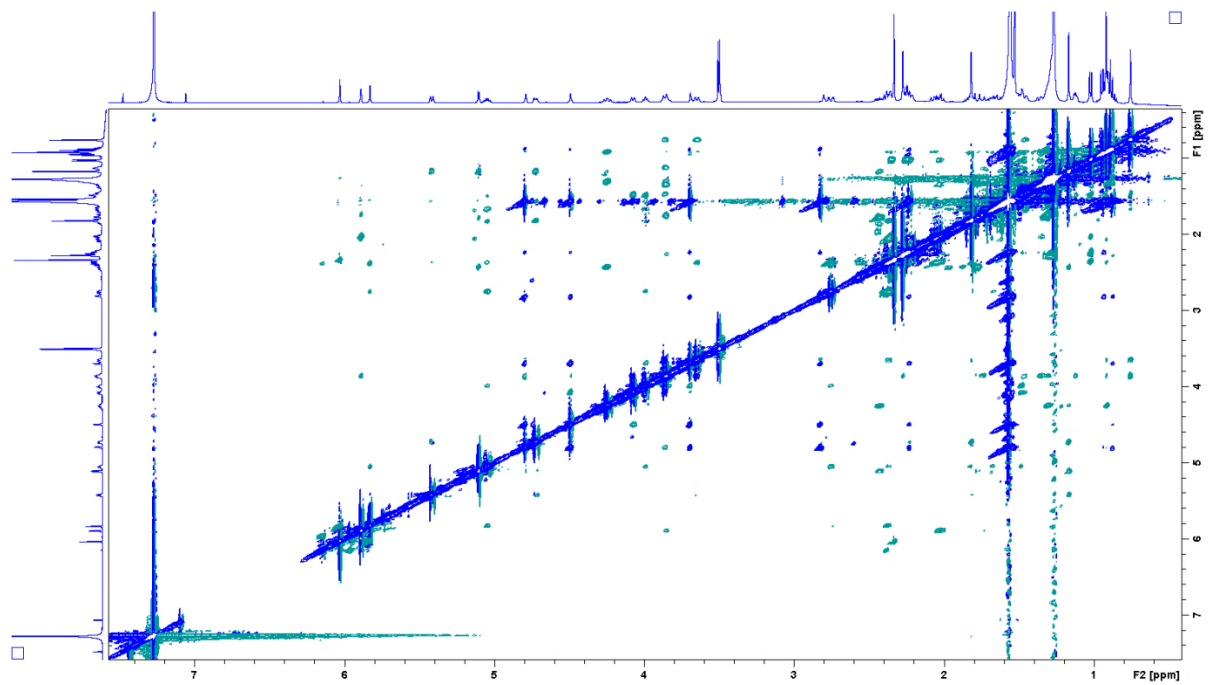

Supplementary Note Figure 31: NOESY spectrum of leptolyngbyalide C (12) from *Leptolyngbya* sp. PCC 7375 in CDCl<sub>3</sub> (n = 1).

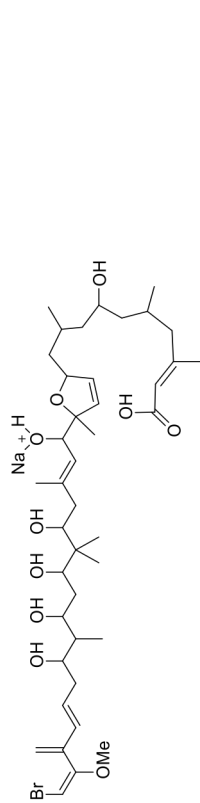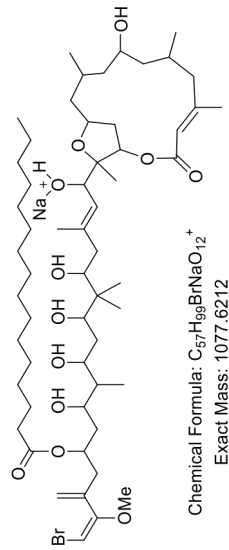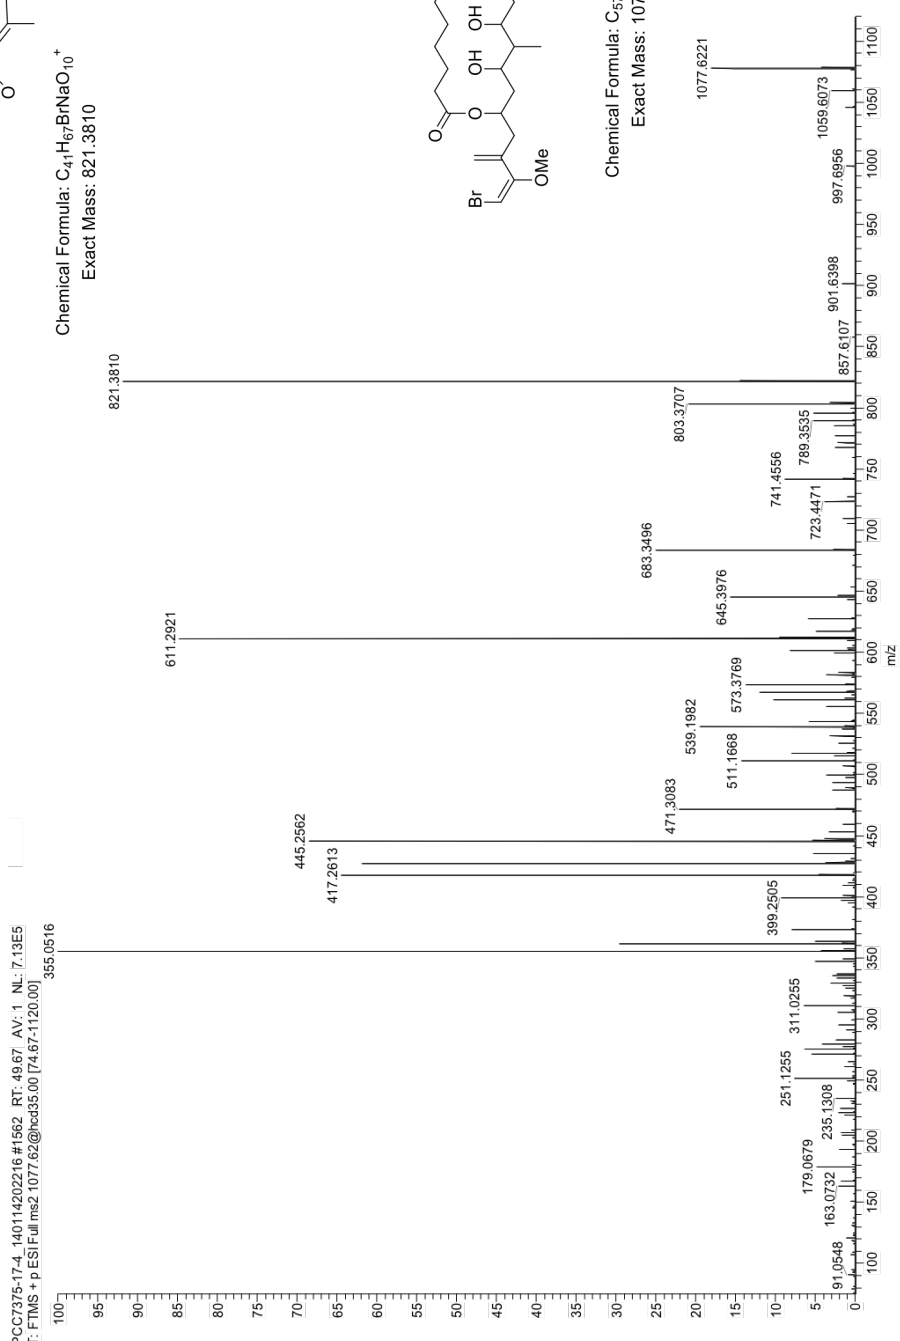

Supplementary Note Figure 32: HR-ESI-MS<sup>2</sup> spectrum of leptolynbyalide A (10) (n = 1).

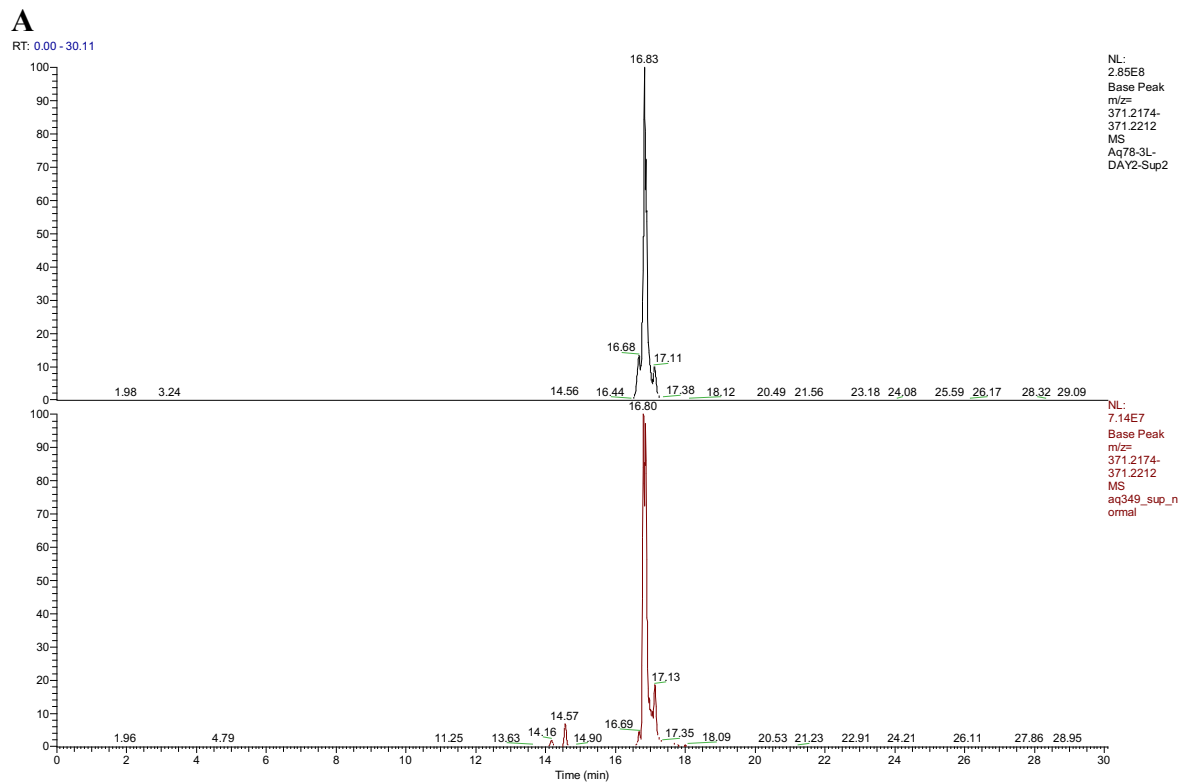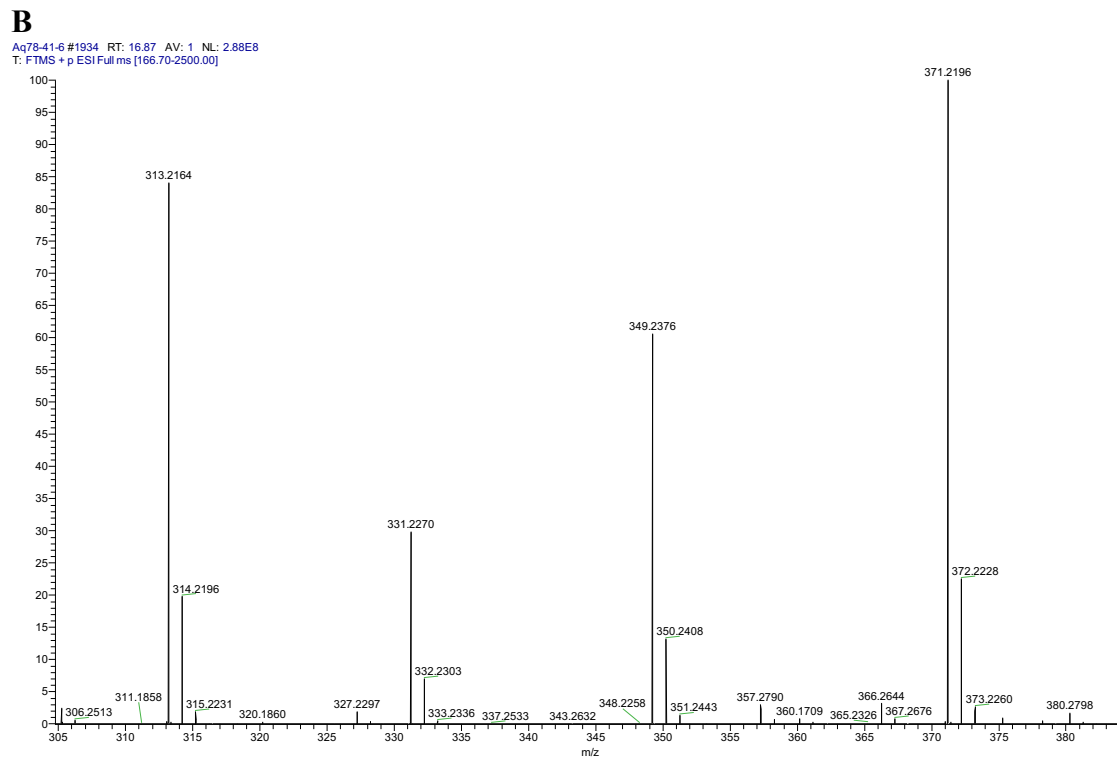

**Supplementary Note Figure 33: HR-ESI-MS spectra of cuniculene 6A from *Aquimarinina* sp. Aq78 and *Aquimarinina* sp. Aq349. A:** Extracted ion chromatogram ( $m/z$  371.2174-371.2212) of the extract from *Aquimarinina* sp. Aq78 (upper) and *Aquimarinina* sp. Aq349 (lower). **B:** HR-ESI-MS spectrum of cuniculene 6A (**14**) from *Aquimarinina* sp. Aq78 ( $m/z$  349.2376  $[M+H]^+$ ,  $m/z$  371.2196  $[M+Na]^+$ ,  $m/z$  331.2270  $[M+H-H_2O]^+$ ,  $m/z$  313.2164  $[M+H-2H_2O]^+$ ) ( $n = 1$ ).

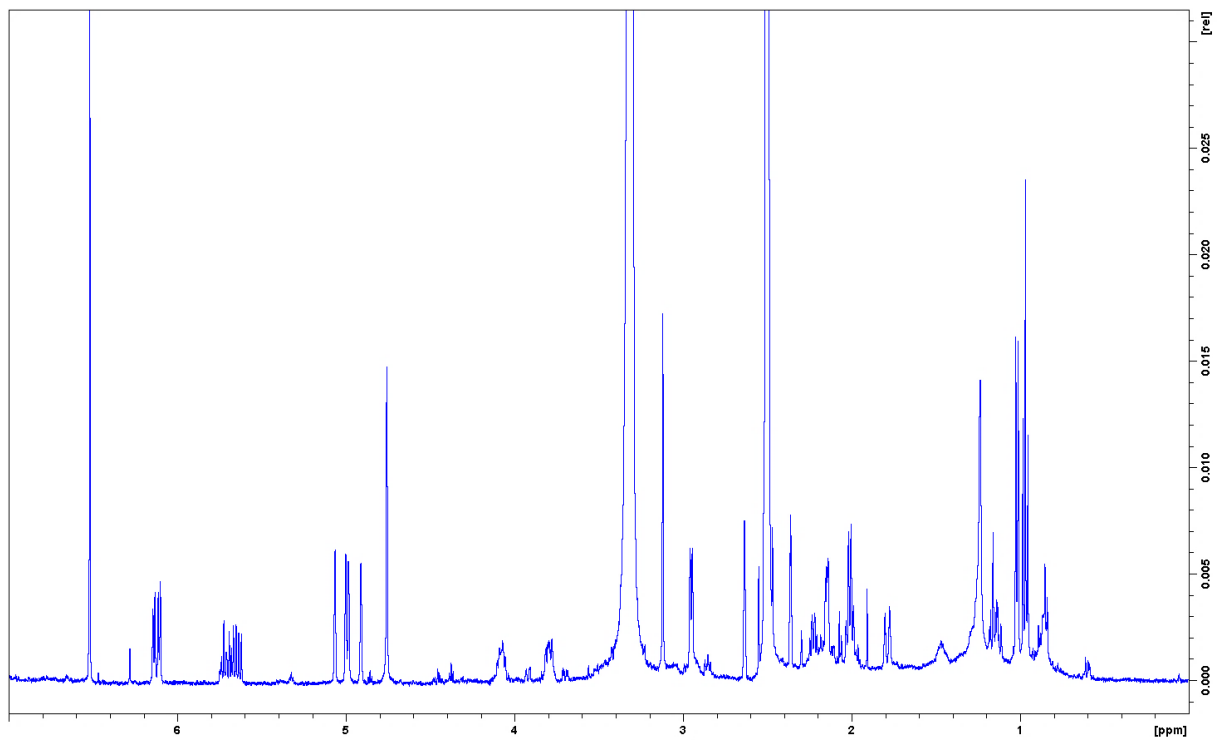

Supplementary Note Figure 34:  $^1\text{H}$  NMR spectrum of cuniculene 6A (14) from *Aquimarina* sp. Aq78 in  $\text{DMSO-}d_6$  ( $n = 1$ ).

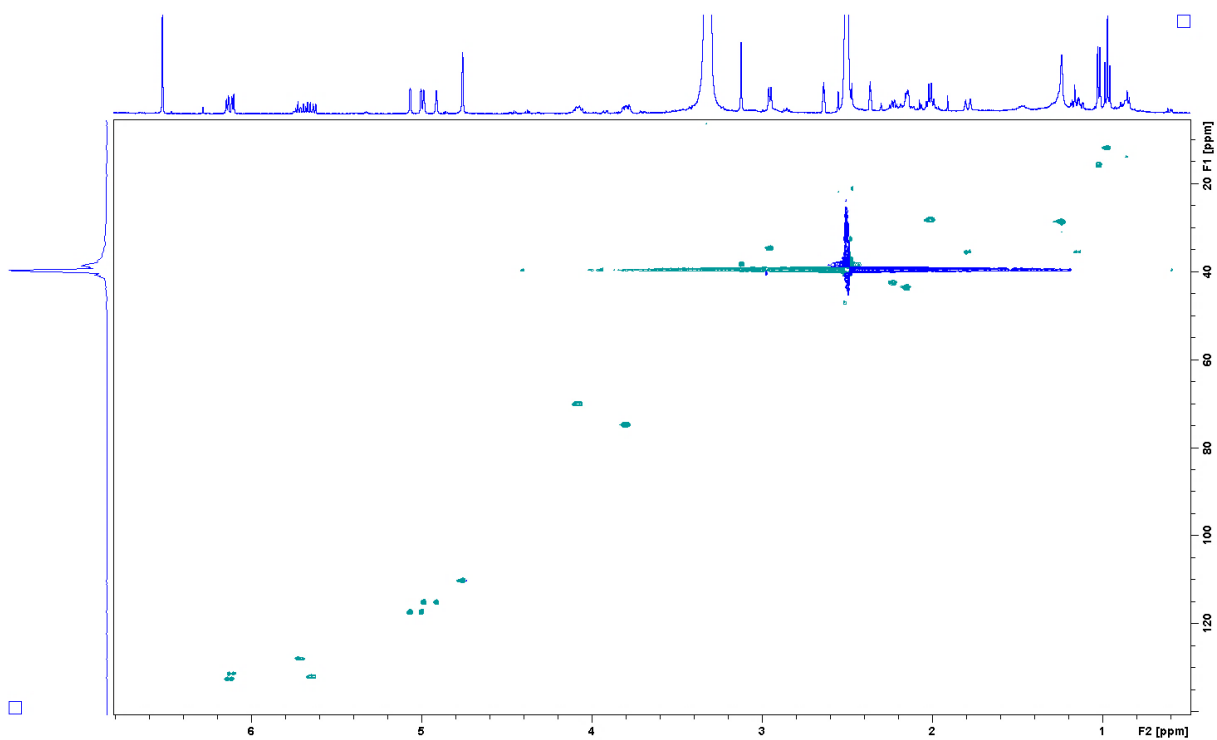

Supplementary Note Figure 35: HSQC spectrum of cuniculene 6A (14) from *Aquimarina* sp. Aq78 in  $\text{DMSO-}d_6$  ( $n = 1$ ).

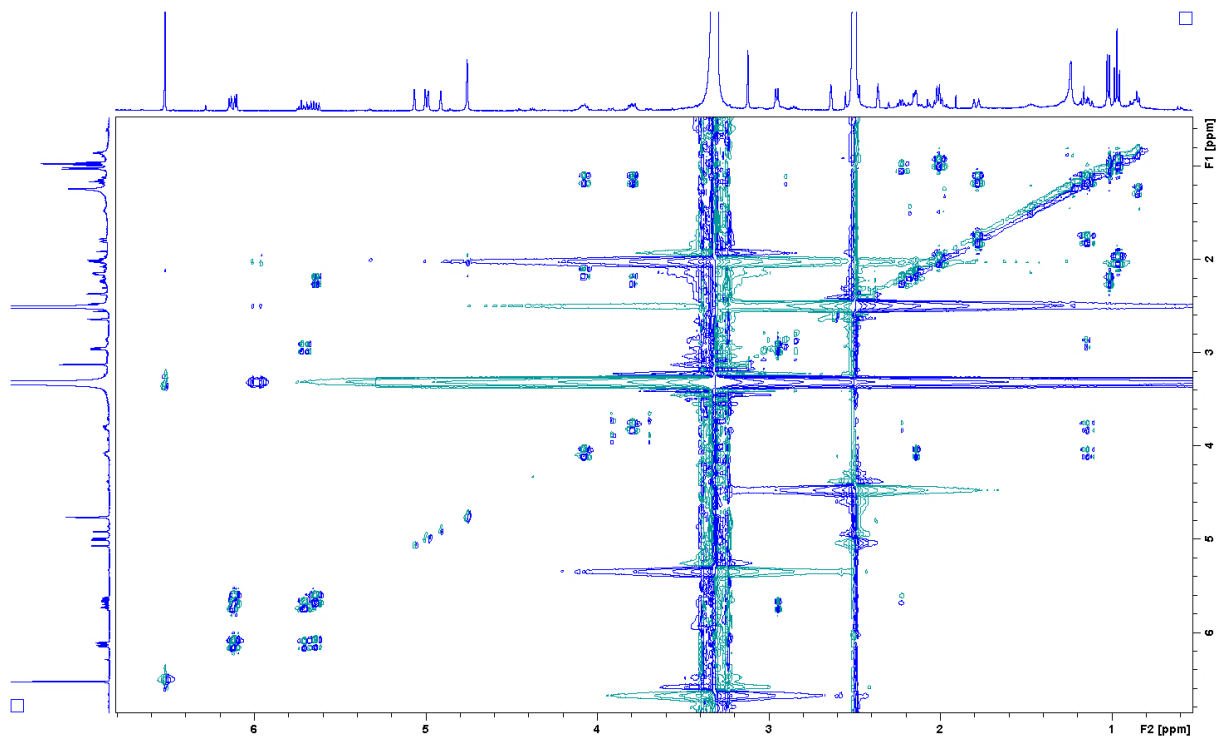

Supplementary Note Figure 36: COSY spectrum of cuniculene 6A (14) from *Aquimarina* sp. Aq78 in DMSO-*d*<sub>6</sub> (n = 1).

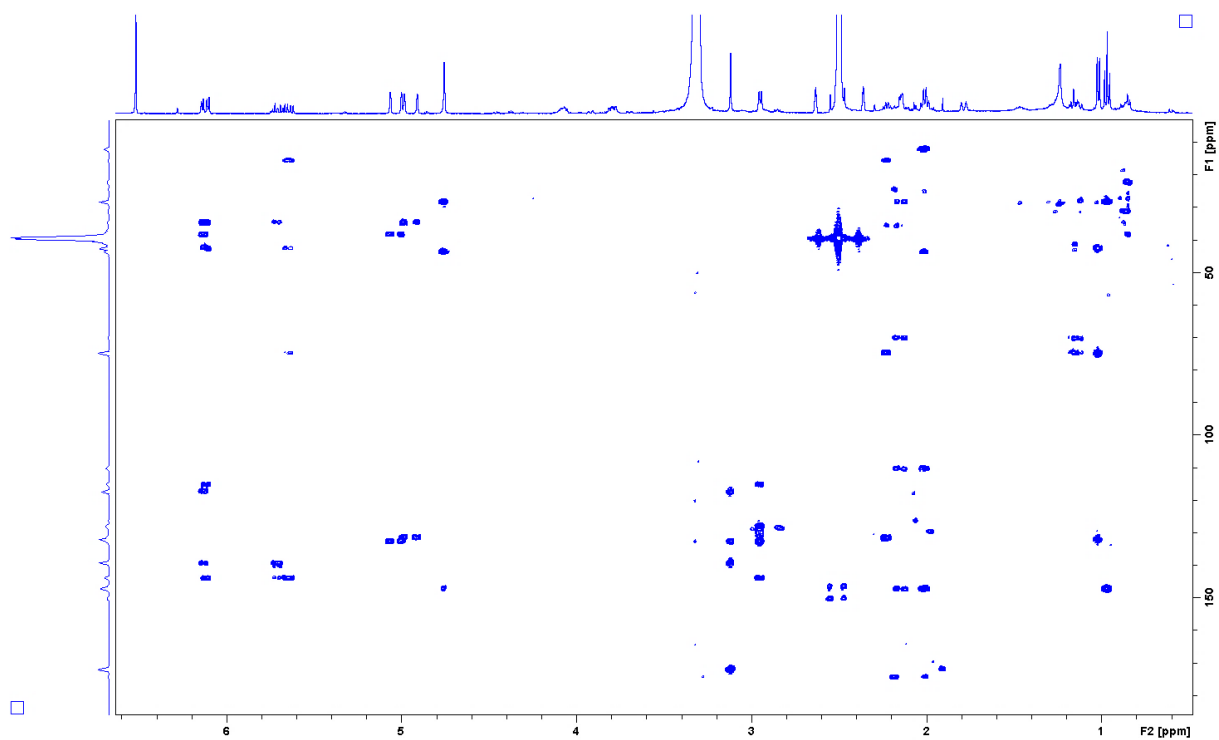

Supplementary Note Figure 37: HMBC spectrum of cuniculene 6A (14) from *Aquimarina* sp. Aq78 in DMSO-*d*<sub>6</sub> (n = 1).

Aq78-3L-DAY2-Sup2#1850 RT: 16.14 AV: 1 NL: 3.98E8  
T: FTMS + p ESI Full ms [166.70-2500.00]

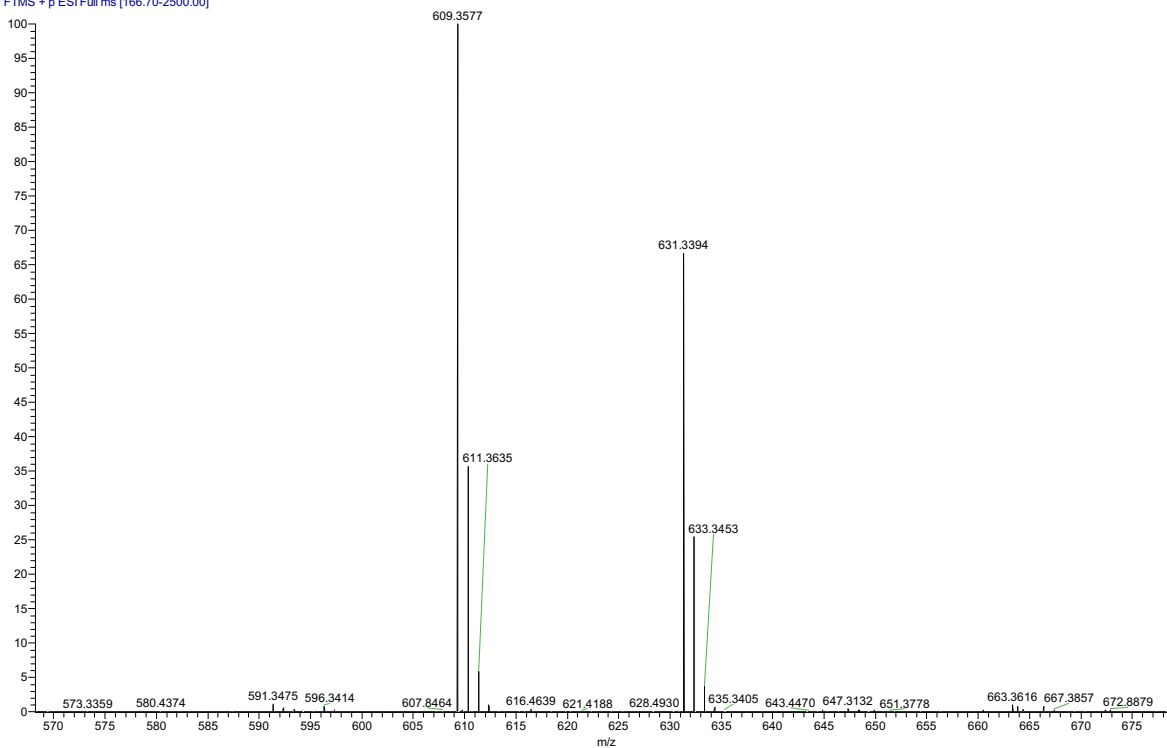

Supplementary Note Figure 38: HR-ESI-MS spectrum of cuniculene 6B (15) from *Aquimarina* sp. Aq78 ( $m/z$  609.3577  $[M+H]^+$ ,  $m/z$  631.3394  $[M+Na]^+$ ) ( $n = 1$ ).

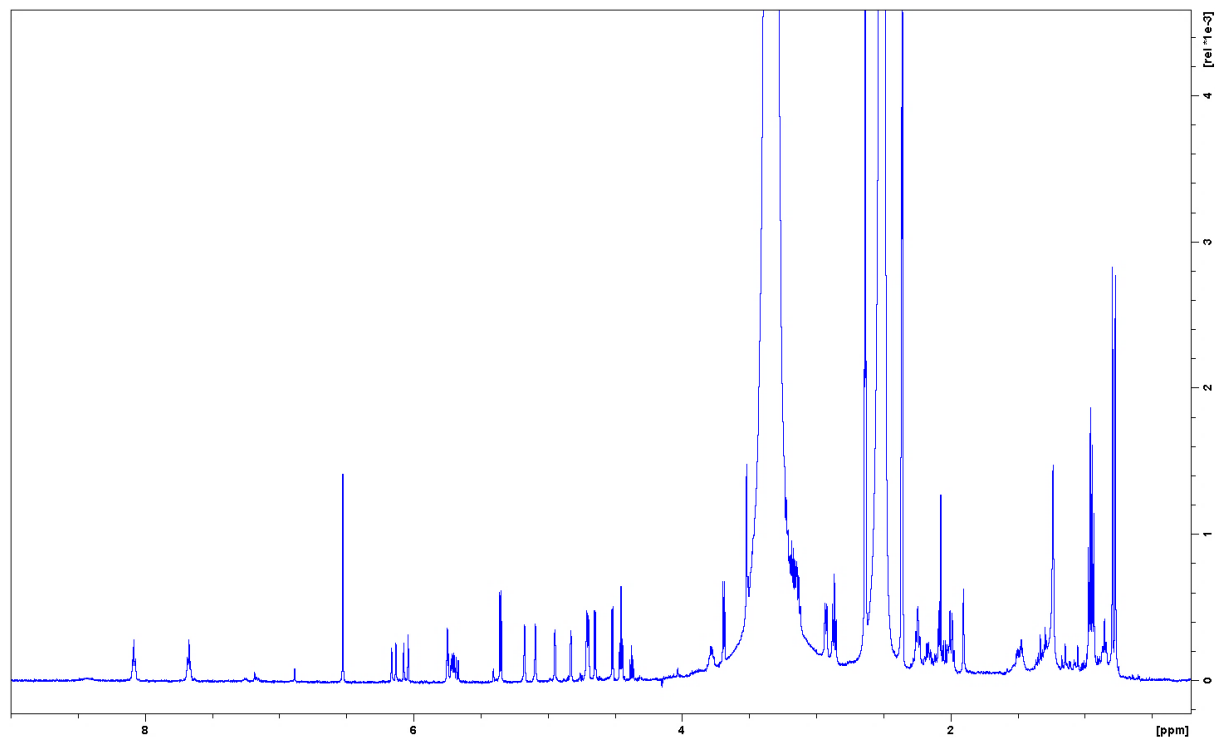

Supplementary Note Figure 39:  $^1H$  NMR spectrum of cuniculene 6B (15) from *Aquimarina* sp. Aq78 in  $DMSO-d_6$  ( $n = 1$ ).



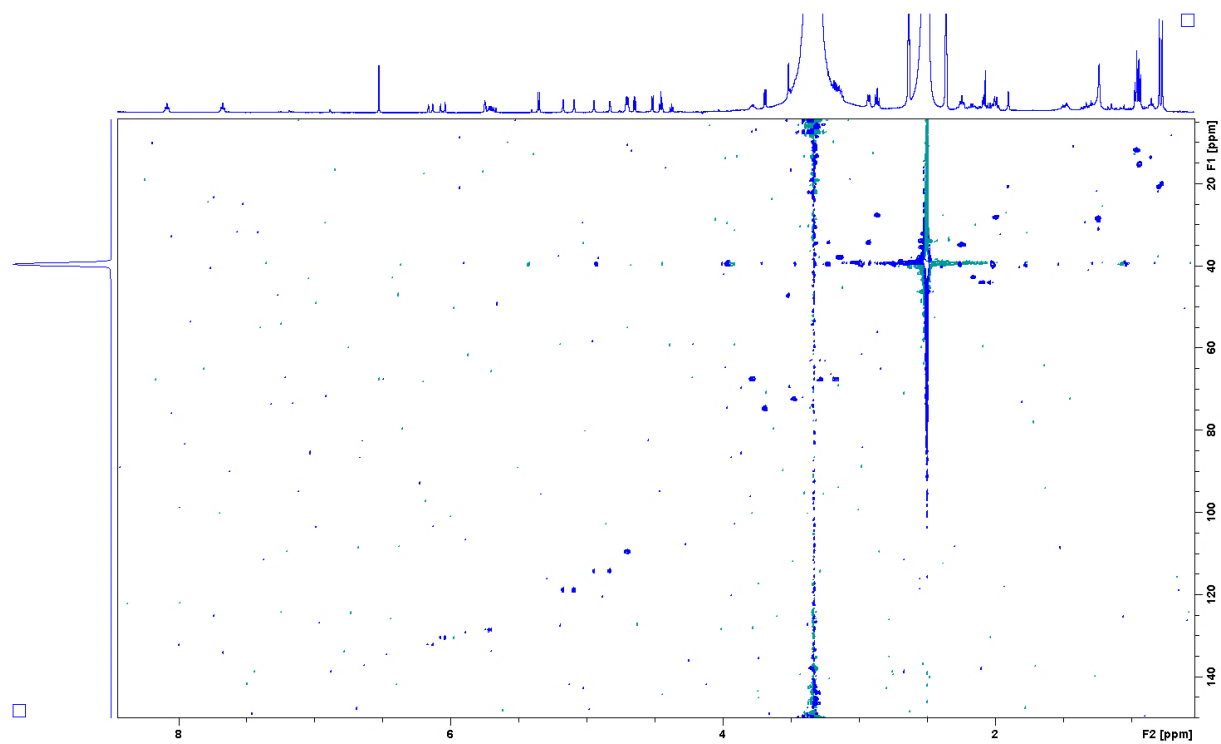

Supplementary Note Figure 40: HSQC spectrum of cuniculene 6B (15) from *Aquimarina* sp. Aq78 in DMSO-*d*<sub>6</sub> (n = 1).

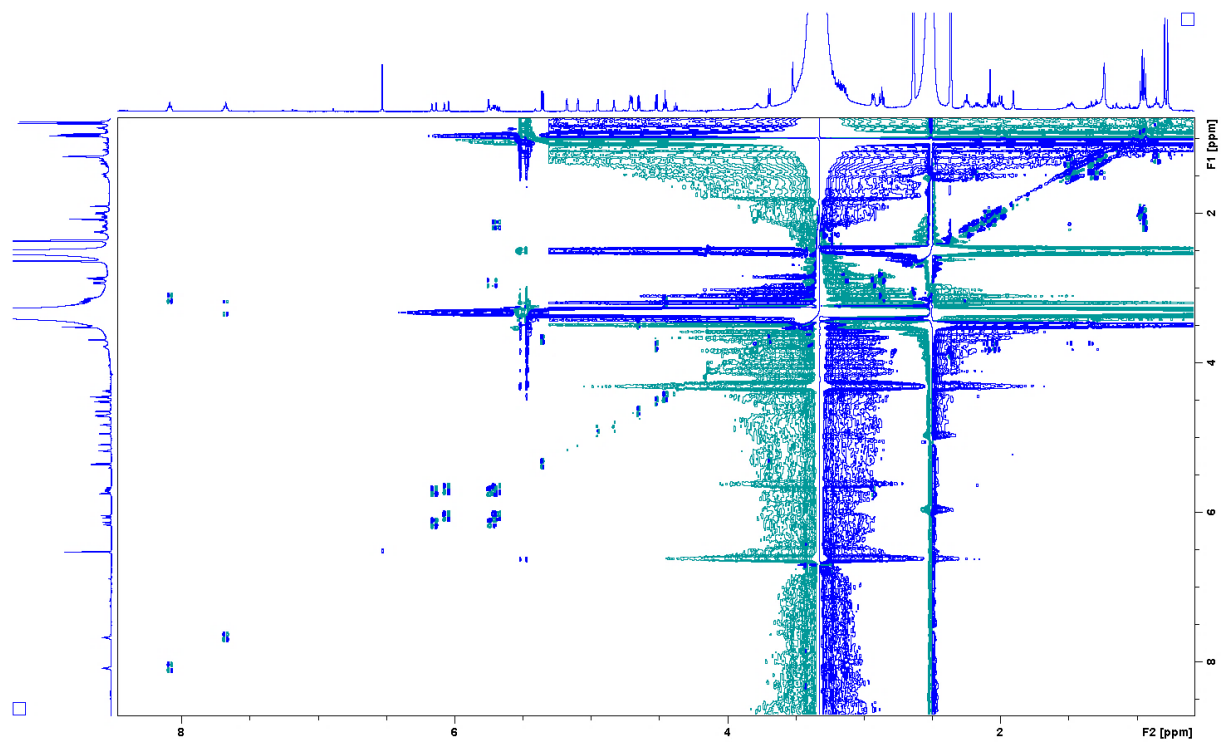

Supplementary Note Figure 41: COSY spectrum of cuniculene 6B (15) from *Aquimarina* sp. Aq78 in DMSO-*d*<sub>6</sub> (n = 1).

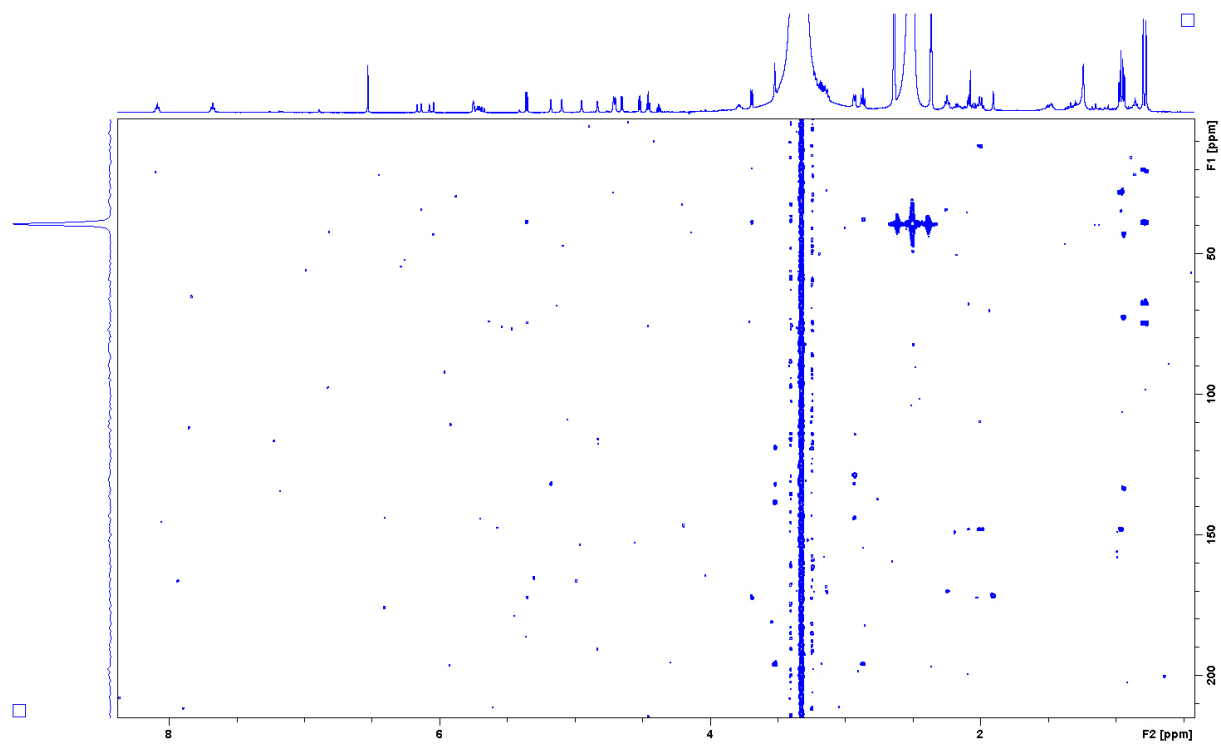

Supplementary Note Figure 42: HMBC spectrum of cuniculene 6B (15) from *Aquimarina* sp. Aq78 in DMSO- $d_6$  ( $n = 1$ ).

**Supplementary Note Table 1: NMR chemical shifts of tartrolons F (5) and G (6) in CD<sub>3</sub>OD.**

| Compound 5 |            |                       | Compound 6 |            |                       |            |                            |
|------------|------------|-----------------------|------------|------------|-----------------------|------------|----------------------------|
| No.        | $\delta_C$ | $\delta_H$ , mult.    | No.        | $\delta_C$ | $\delta_H$ , mult.    | $\delta_C$ | $\delta_H$ , mult.         |
| 1          | 172.2      |                       | 1'         | 172.4      |                       | 172.5      |                            |
| 2          | 74.5       | 4.15 s                | 2'         | 74.7       | 4.18 s                | 74.6       | 4.17 s                     |
| 3          | 99.3       |                       | 3'         | 99.1       |                       | 99.2       |                            |
| 4          | 35.3       | 2.05 ovlp             | 4'         | 35.4       | 2.05 ovlp             | 35.5       | 2.09 m                     |
| 5          | 28.9       | 1.54 ovlp             | 5'         | 28.9       | 1.54 ovlp             | 28.9       | 1.55 ovlp                  |
|            |            | 1.70 ovlp             |            |            | 1.70 ovlp             |            | 1.70 ovlp                  |
| 6          | 33.0       | 1.24 m                | 6'         | 33.0       | 1.24 m                | 33.2       | 1.24 ovlp                  |
|            |            |                       |            |            |                       |            | 1.53 ovlp                  |
| 7          | 68.2       | 4.27 m                | 7'         | 67.5       | 4.03 m                | 67.1       | 4.02 ovlp                  |
| 8          | 49.9       | 2.40 (dd, 4.2, 14.9)  | 8'         | 44.8       | 1.44 (dd, 6.1, 6.1)   | 45.1       | 1.40 m                     |
|            |            | 2.54 (dd, 8.8, 14.9)  |            |            |                       |            |                            |
| 9          | 211.3      |                       | 9'         | 67.9       | 3.97 m                | 67.1       | 4.02 ovlp                  |
|            |            | 2.53 (dd, 8.8, 15.8)  |            |            |                       |            |                            |
| 10         | 52.3       | 2.63 (dd, 3.9, 15.8)  | 10'        | 45.2       | 1.53 ovlp             | 45.4       | 1.46 ovlp                  |
|            |            |                       |            |            |                       |            | 1.55 ovlp                  |
| 11         | 67.7       | 4.08 m                | 11'        | 70.8       | 3.75 m                | 70.5       | 3.76 m                     |
| 12         | 37.7       | 1.52 ovlp             | 12'        | 37.7       | 1.52 ovlp             | 37.3       | 1.48 ovlp                  |
|            |            | 1.57 ovlp             |            |            | 1.57 ovlp             |            | 1.61 m                     |
| 13         | 29.7       | 2.18 ovlp             | 13'        | 29.7       | 2.18 ovlp             | 30.0       | 2.14 ovlp                  |
|            |            | 2.25 ovlp             |            |            | 2.25 ovlp             |            | 2.26 m                     |
|            |            |                       |            | 135.6      |                       | 135.6      | 5.68 (ddd, 7.8, 7.8, 15.0) |
| 14         | 135.6      | 5.70 ovlp             | 14'        | 6          | 5.70 ovlp             | 6          |                            |
|            |            |                       |            | 126.8      |                       | 126.8      | 6.36 (dd, 11.0, 15.0)      |
| 15         | 126.8      | 6.36 ovlp             | 15'        | 8          | 6.36 ovlp             | 8          |                            |
|            |            | 5.99 (dd, 10.8, 10.8) |            | 130.7      | 5.99 (dd, 10.8, 10.8) | 130.6      | 5.98 (dd, 11.0, 11.0)      |
| 16         | 130.7      |                       | 16'        | 7          |                       | 6          |                            |
|            |            |                       |            | 129.2      |                       | 129.0      |                            |
| 17         | 129.2      | 5.29 ovlp             | 17'        | 2          | 5.29 ovlp             | 0          | 5.26 m                     |
| 18         | 24.6       | 2.24 ovlp             | 18'        | 24.6       | 2.24 ovlp             | 24.4       | 2.19 m                     |
|            |            | 2.30 ovlp             |            |            | 2.30 ovlp             |            | 2.38 m                     |
| 19         | 36.7       | 1.63 ovlp             | 19'        | 36.7       | 1.63 ovlp             | 36.3       | 1.65 m                     |
|            |            | 1.75 ovlp             |            |            | 1.75 ovlp             |            | 1.76 m                     |
| 20         | 72.7       | 4.99 ovlp             | 20'        | 72.7       | 4.97 ovlp             | 72.4       | 4.95 m                     |
| 21         | 20.4       | 1.29 (d, 6.2)         | 21'        | 20.3       | 1.27 (d, 6.3)         | 20.4       | 1.26 (d, 6.1)              |
| 22         | 16.7       | 0.99 (d, 6.7)         | 22'        | 16.7       | 1.00 (d, 6.7)         | 16.6       | 0.99 (d, 6.7)              |

**Supplementary Note Table 2: NMR chemical shifts of leptolyngbyalides A-C (10-12) in CDCl<sub>3</sub>.**

| No. | Compound 10 |                                      | Compound 11 |                                    | Compound 12 |                                              |
|-----|-------------|--------------------------------------|-------------|------------------------------------|-------------|----------------------------------------------|
|     | $\delta_C$  | $\delta_H$ , mult.                   | $\delta_C$  | $\delta_H$ , mult.                 | $\delta_C$  | $\delta_H$ , mult.                           |
| 1   | 165.9       |                                      | 165.9       |                                    | 166.0       |                                              |
| 2   | 117.7       | 5.89 s                               | 117.7       | 5.89 s                             | 117.7       | 5.89 s                                       |
| 3   | 161.3       |                                      | 161.3       |                                    | 161.3       |                                              |
| 4   | 51.0        | 2.03 (dd, 11.8, 11.8)<br>2.37 ovlp   | 51.1        | 2.02 (dd, 11.7, 11.7)<br>2.35 ovlp | 51.0        | 2.03 ovlp<br>2.37 ovlp                       |
| 5   | 26.8        | 2.26 ovlp                            | 26.8        | 2.24 m                             | 26.8        | 2.26 ovlp                                    |
| 6   | 48.2        | 1.37 ovlp<br>1.49 ovlp               | 48.2        | 1.36 ovlp<br>1.48 ovlp             | 48.2        | 1.37 ovlp<br>1.49 ovlp                       |
| 7   | 68.8        | 3.86 ovlp                            | 68.9        | 3.86 ovlp                          | 68.8        | 3.86 ovlp                                    |
| 8   | 48.4        | 1.12 m                               | 48.4        | 1.12 m                             | 48.4        | 1.12 m                                       |
| 9   | 27.3        | 1.29 ovlp                            | 27.2        | 1.30 ovlp                          | 27.2        | 1.32 ovlp                                    |
| 10  | 44.4        | 1.32 ovlp<br>1.73 m                  | 44.4        | 1.29 ovlp<br>1.74 ovlp             | 44.4        | 1.32 ovlp<br>1.73 m                          |
| 11  | 76.7        | 4.25 (dd, 10.3, 10.3)                | 76.7        | 4.27 br                            | 76.7        | 4.25 br                                      |
| 12  | 36.1        | 1.78 m<br>2.43 (ddd, 4.4, 8.7, 13.1) | 36.1        | 1.78 ovlp<br>2.44 m                | 36.1        | 1.76 ovlp<br>2.43 (ddd, 4.5, 8.9, 14.4)      |
| 13  | 78.6        | 5.10 (d, 4.3)                        | 78.6        | 5.10 (d, 4.3)                      | 78.6        | 5.10 (d, 4.3)                                |
| 14  | 87.0        |                                      | 86.8        |                                    | 86.9        |                                              |
| 15  | 70.1        | 4.73 (dd, 3.7, 9.0)                  | 70.1        | 4.72 (dd, 3.4, 8.9)                | 70.0        | 4.73 (dd, 3.7, 8.9)                          |
| 16  | 127.5       | 5.42 (d, 9.0)                        | 127.5       | 5.42 (d, 8.9)                      | 127.4       | 5.42 (d, 8.9)                                |
| 17  | 137.7       |                                      | 137.7       |                                    | 137.8       |                                              |
| 18  | 42.3        | 2.06 (dd, 10.9, 13.1)<br>2.37 ovlp   | 42.4        | 2.06 (dd, 10.9, 13.2)<br>2.37 ovlp | 42.3        | 2.06 (dd, 11.1, 13.1)<br>2.38 ovlp           |
| 19  | 77.3        | 3.65 (d, 10.9)                       | 77.2        | 3.65 ovlp                          | 77.2        | 3.66 (d, 10.6)                               |
| 20  | 40.6        |                                      | 40.5        |                                    | 40.6        |                                              |
| 21  | 81.6        | 3.86 ovlp                            | 81.6        | 3.86 ovlp                          | 81.5        | 3.86 ovlp                                    |
| 22  | 35.1        | 1.48 ovlp<br>1.65 ovlp               | 35.2        | 1.46 ovlp<br>1.66 ovlp             | 35.0        | 1.47 ovlp<br>1.66 ovlp                       |
| 23  | 78.0        | 4.08 (d, 9.7)                        | 78.0        | 4.07 (d, 9.8)                      | 77.9        | 4.08 (d, 9.9)                                |
| 24  | 41.3        | 1.48 ovlp                            | 41.3        | 1.48 ovlp                          | 41.3        | 1.49 ovlp                                    |
| 25  | 73.7        | 3.99 (dd, 6.4, 6.4)                  | 73.9        | 3.99 (dd, 6.7, 6.7)                | 73.9        | 3.98 (dd, 6.2, 6.2)                          |
| 26  | 39.5        | 1.66 ovlp<br>1.82 ovlp               | 39.1        | 1.75 ovlp<br>1.80 ovlp             | 39.2        | 1.78 ovlp                                    |
| 27  | 70.5        | 5.05 m                               | 71.1        | 5.07 m                             | 70.5        | 4.99 m                                       |
| 28  | 36.4        | 2.39 ovlp<br>2.76 (dd, 3.4, 13.9)    | 39.1        | 2.45<br>2.61 (dd, 6.9, 14.1)       | 39.4        | 2.55 (dd, 6.2, 14.3)<br>2.60 (dd, 6.8, 14.3) |
| 29  | 145.4       |                                      | 139.2       |                                    | 138.4       |                                              |
| 30  | 199.5       |                                      | 160.1       |                                    | 158.6       |                                              |
| 31  | 25.7        | 2.33 s                               | 83.6        | 4.17 brd                           | 78.9        | 5.34 s                                       |

|       |           |               |           |               |           |               |
|-------|-----------|---------------|-----------|---------------|-----------|---------------|
|       |           |               |           | 4.46 (d, 2.7) |           |               |
| 32    | 18.5      | 2.27 brs      | 18.5      | 2.27 brs      | 18.4      | 2.27 brs      |
| 33    | 24.9      | 1.02 (d, 6.9) | 25.0      | 1.02 (d, 6.8) | 24.9      | 1.02 (d, 6.8) |
| 34    | 21.4      | 0.91 ovlp     | 21.4      | 0.92 ovlp     | 21.4      | 0.91 ovlp     |
| 35    | 20.9      | 1.17 s        | 21.0      | 1.17 s        | 20.9      | 1.17 s        |
| 36    | 17.4      | 1.82 brs      | 17.5      | 1.82 brs      | 17.5      | 1.82 brs      |
| 37    | 21.5      | 0.76 s        | 21.6      | 0.75 s        | 21.5      | 0.76 s        |
| 38    | 13.8      | 0.92 s        | 14.0      | 0.92 s        | 13.9      | 0.92 s        |
| 39    | 5.0       | 0.94 (d, 7.0) | 4.9       | 0.92 ovlp     | 4.9       | 0.94 (d, 7.2) |
| 40    | 127.3     | 5.83 s        | 115.8     | 5.02 brs      | 122.2     | 5.39 brs      |
|       |           | 6.03 s        |           | 5.54 brd      |           | 5.43 brs      |
| 41    | 173.8     |               | 173.8     |               | 173.8     |               |
| 42    | 34.7      | 2.24 m        | 34.8      | 2.28 ovlp     | 34.8      | 2.29 ovlp     |
| 43    | 25.1      | 1.59 ovlp     | 25.2      | 1.62 ovlp     | 24.9      | 1.62 ovlp     |
| 44    | 29.4      | 1.31 ovlp     | 29.2      | 1.30 ovlp     | 29.3      | 1.31 ovlp     |
| 45-53 | 28.4-30.5 | 1.28 ovlp     | 29.2-30.2 | 1.27 ovlp     | 28.7-30.7 | 1.28 ovlp     |
| 54    | 31.9      | 1.28 ovlp     | 32.0      | 1.27 ovlp     | 31.9      | 1.29 ovlp     |
| 55    | 22.7      | 1.29 ovlp     | 22.8      | 1.29 ovlp     | 22.7      | 1.29 ovlp     |
| 56    | 14.1      | 0.88 (t, 7.3) | 14.2      | 0.89 (t, 7.1) | 14.2      | 0.89 (t, 7.2) |
| 57    |           |               | 55.1      | 3.61 s        | 55.7      | 3.60 s        |
| 19-OH |           | 2.80 br       |           |               |           |               |
| 21-OH |           | 4.79 br       |           | 4.80 br       |           | 4.79 br       |
| 23-OH |           | 4.49 br       |           | 4.49 br       |           | 4.46 br       |
| 25-OH |           | 3.69 br       |           | 3.64 br       |           | 3.59 br       |

**Supplementary Note Table 3: NMR chemical shifts of cuniculene 6A (14) in DMSO-*d*<sub>6</sub>.**

| Compound 14 |            |                      |
|-------------|------------|----------------------|
| No.         | $\delta_C$ | $\delta_H$ , mult.   |
| 1           | 172.1      |                      |
| 2           | 38.3       | 3.12 s               |
| 3           | 139.3      |                      |
| 4           | 132.6      | 6.13 (d, 15.8)       |
| 5           | 127.9      | 5.71 (dt, 6.8, 15.8) |
| 6           | 34.6       | 2.95 (d, 6.8)        |
| 7           | 143.9      |                      |
| 8           | 131.3      | 6.12 (d, 15.8)       |
| 9           | 132.1      | 5.64 (dd, 8.0, 15.8) |
| 10          | 42.4       | 2.23 m               |
| 11          | 74.7       | 3.80 m               |
| 12          | 35.5       | 1.14 m               |
|             |            | 1.79 brddd           |
| 13          | 70.1       | 4.08 m               |
| 14          | 43.5       | 2.15 m               |
|             |            |                      |
| 15          | 147.0      |                      |
| 16          | 28.2       | 2.01 (q, 7.4)        |
| 17          | 11.9       | 0.97 (t, 7.4)        |
| 18          | 117.3      | 5.00 brs             |
|             |            | 5.07 brs             |
| 19          | 115.1      | 4.91 brs             |
|             |            | 4.98 brs             |
| 20          | 15.6       | 1.02 (d, 6.7)        |
| 21          | 110.2      | 4.76 brs             |

**Supplementary Note Table 4: NMR chemical shifts of cuniculene 6B (15) in DMSO-*d*<sub>6</sub>.**

| Compound 15 |            |                      |       |            |                     |
|-------------|------------|----------------------|-------|------------|---------------------|
| No.         | $\delta_C$ | $\delta_H$ , mult.   | No.   | $\delta_C$ | $\delta_H$ , mult.  |
| 1           | 196.2      |                      | 1'    | 67.7       | 3.17 m              |
| 2           | 47.2       | 3.52 s               |       |            | 3.28 ovlp.          |
| 3           | 138.6      |                      | 1'-OH |            | 4.45 (dd, 5.6, 5.6) |
| 4           | 132.1      | 6.15 (d, 15.9)       | 2'    | 39.0       |                     |
| 5           | 128.5      | 5.72 (dt, 6.7, 15.9) | 3'    | 74.7       | 3.69 (d, 5.6)       |
| 6           | 34.3       | 2.93 (d, 6.7)        | 3'-OH |            | 5.35 (d, 5.6)       |
| 7           | 144.1      |                      | 4'    | 172.6      |                     |
| 8           | 130.4      | 6.06 (d, 15.9)       | 5'-NH |            | 7.67 brt            |
| 9           | 133.7      | 5.69 (dd, 8.0, 15.9) | 6'    | 34.4       | 3.27 ovlp.          |
| 10          | 42.8       | 2.16 m               | 7'    | 34.8       | 2.24 m              |
| 11          | 72.4       | 3.48 m               | 8'    | 170.4      |                     |
| 12          |            | 1.32 m               | 9'-NH |            | 8.08 brt            |
|             |            | 1.48 m               | 10'   | 37.8       | 3.14 m              |
| 13          | 67.6       | 3.78 m               | 11'   | 27.7       | 2.87 (t, 7.0)       |
| 14          | 44.1       | 2.04 m               | 12'   | 20.0       | 0.77 s              |
|             |            | 2.09 m               | 13'   | 20.7       | 0.79 s              |
| 15          |            |                      |       |            |                     |
| 16          | 28.2       | 2.00 (q, 7.4)        |       |            |                     |
| 17          | 11.8       | 0.96 (t, 7.4)        |       |            |                     |
| 18          | 118.8      | 5.09 brs             |       |            |                     |
|             |            | 5.17 brs             |       |            |                     |
| 19          | 114.2      | 4.83 brs             |       |            |                     |
|             |            | 4.95 brs             |       |            |                     |
| 20          | 15.2       | 0.94 (d, 6.3)        |       |            |                     |
| 21          | 109.5      | 4.70 brd             |       |            |                     |
| 11-OH       |            | 4.65 (d, 4.7)        |       |            |                     |
| 13-OH       |            | 4.52 (d, 4.5)        |       |            |                     |
